# Supplementary material for: ER-Golgi and lysosomal pathways together drive fibrous tissue formation
Source: Research Square preprint supplement (doi:10.21203/rs.3.rs-1336021/v1), 2022-03-03
Supplement: Supplementary file 1 [file ff54a0d8db1364c12cbb4158.xlsx]

## Sheet: Supplementary Table 1
Table 1: Proteins identified in lysosomal fractions	Number of Unique peptides
Identified Proteins (2155)	Lysosome Fractions 6	Lysosome Fractions 7
AHNAK nucleoprotein (desmoyokin) OS=Mus musculus GN=Ahnak PE=1 SV=1	244	255
Plectin OS=Mus musculus GN=Plec PE=1 SV=3	171	176
Myosin-9 OS=Mus musculus GN=Myh9 PE=1 SV=4	121	117
Spectrin alpha chain, non-erythrocytic 1 OS=Mus musculus GN=Sptan1 PE=1 SV=1	110	119
Cytoplasmic dynein 1 heavy chain 1 OS=Mus musculus GN=Dync1h1 PE=1 SV=2	99	117
Spectrin beta chain, non-erythrocytic 1 OS=Mus musculus GN=Sptbn1 PE=1 SV=2	95	94
Filamin, alpha OS=Mus musculus GN=Flna PE=2 SV=1	91	90
Fibronectin OS=Mus musculus GN=Fn1 PE=1 SV=1	88	80
Low density lipoprotein receptor-related protein 1 OS=Mus musculus GN=Lrp1 PE=1 SV=1	83	77
Filamin-B OS=Mus musculus GN=Flnb PE=1 SV=3	82	81
Myof protein OS=Mus musculus GN=Myof PE=2 SV=1	61	63
Leucine-rich PPR motif-containing protein, mitochondrial OS=Mus musculus GN=Lrpprc PE=1 SV=2	54	54
Collagen alpha-1(I) chain OS=Mus musculus GN=Col1a1 PE=1 SV=4	52	45
Ras GTPase-activating-like protein IQGAP1 OS=Mus musculus GN=Iqgap1 PE=1 SV=2	52	51
Uncharacterized protein OS=Mus musculus GN=Tln1 PE=2 SV=1	50	52
Microtubule-actin cross-linking factor 1 (Fragment) OS=Mus musculus GN=Macf1 PE=1 SV=1	48	48
Ribosome-binding protein 1 OS=Mus musculus GN=Rrbp1 PE=1 SV=1	48	49
Collagen, type VI, alpha 3 OS=Mus musculus GN=Col6a3 PE=1 SV=2	47	38
Collagen alpha-1(III) chain OS=Mus musculus GN=Col3a1 PE=1 SV=4	46	40
Inositol 1,4,5-trisphosphate receptor type 3 OS=Mus musculus GN=Itpr3 PE=1 SV=3	46	48
Endoplasmin OS=Mus musculus GN=Hsp90b1 PE=1 SV=2	45	40
60 kDa heat shock protein, mitochondrial OS=Mus musculus GN=Hspd1 PE=1 SV=1	45	41
Aconitate hydratase, mitochondrial OS=Mus musculus GN=Aco2 PE=1 SV=1	42	35
78 kDa glucose-regulated protein OS=Mus musculus GN=Hspa5 PE=1 SV=3	42	41
Collagen alpha-2(I) chain OS=Mus musculus GN=Col1a2 PE=1 SV=2	42	41
Utrophin OS=Mus musculus GN=Utrn PE=1 SV=1	42	45
Monofunctional C1-tetrahydrofolate synthase, mitochondrial OS=Mus musculus GN=Mthfd1l PE=1 SV=2	41	34
Stress-70 protein, mitochondrial OS=Mus musculus GN=Hspa9 PE=1 SV=3	41	38
Mitochondrial 10-formyltetrahydrofolate dehydrogenase OS=Mus musculus GN=Aldh1l2 PE=1 SV=2	41	41
ATP synthase subunit alpha, mitochondrial OS=Mus musculus GN=Atp5a1 PE=1 SV=1	40	31
Myosin-10 OS=Mus musculus GN=Myh10 PE=1 SV=2	40	40
Clathrin heavy chain 1 OS=Mus musculus GN=Cltc PE=1 SV=3	40	45
Glycerol-3-phosphate dehydrogenase OS=Mus musculus GN=Gpd2 PE=1 SV=1	39	38
Protein disulfide-isomerase A3 OS=Mus musculus GN=Pdia3 PE=1 SV=2	39	39
Protein disulfide-isomerase OS=Mus musculus GN=P4hb PE=1 SV=2	38	34
Vimentin OS=Mus musculus GN=Vim PE=1 SV=1	38	37
Elongation factor 2 OS=Mus musculus GN=Eef2 PE=1 SV=2	38	39
Trifunctional enzyme subunit alpha, mitochondrial OS=Mus musculus GN=Hadha PE=1 SV=1	37	30
Lon protease homolog, mitochondrial OS=Mus musculus GN=Lonp1 PE=1 SV=2	37	34
Alpha-actinin-4 OS=Mus musculus GN=Actn4 PE=1 SV=1	35	34
UDP-glucose:glycoprotein glucosyltransferase 1 OS=Mus musculus GN=Uggt1 PE=1 SV=4	34	38
Kinectin OS=Mus musculus GN=Ktn1 PE=1 SV=1	33	17
Cytoskeleton-associated protein 4 OS=Mus musculus GN=Ckap4 PE=1 SV=2	33	29
Delta-1-pyrroline-5-carboxylate synthase OS=Mus musculus GN=Aldh18a1 PE=1 SV=2	33	34
Neutral alpha-glucosidase AB OS=Mus musculus GN=Ganab PE=1 SV=1	32	30
2-oxoglutarate dehydrogenase, mitochondrial OS=Mus musculus GN=Ogdh PE=1 SV=3	32	34
Basement membrane-specific heparan sulfate proteoglycan core protein OS=Mus musculus GN=Hspg2 PE=1 SV=1	31	27
Glutamate dehydrogenase 1, mitochondrial OS=Mus musculus GN=Glud1 PE=1 SV=1	31	30
MICOS complex subunit Mic60 OS=Mus musculus GN=Immt PE=1 SV=1	31	31
Protein disulfide-isomerase A4 OS=Mus musculus GN=Pdia4 PE=1 SV=1	31	32
eIF-2-alpha kinase activator GCN1 OS=Mus musculus GN=Gcn1 PE=1 SV=1	31	35
Filamin-C OS=Mus musculus GN=Flnc PE=1 SV=3	31	39
Tubulin beta-5 chain OS=Mus musculus GN=Tubb5 PE=1 SV=1	30	25
Uncharacterized protein OS=Mus musculus GN=Trap1 PE=2 SV=1	30	29
Moesin OS=Mus musculus GN=Msn PE=1 SV=3	30	31
Heat shock protein HSP 90-beta OS=Mus musculus GN=Hsp90ab1 PE=1 SV=3	30	37
Golgi autoantigen, golgin subfamily b, macrogolgin 1 OS=Mus musculus GN=Golgb1 PE=1 SV=1	29	13
Aspartate aminotransferase, mitochondrial OS=Mus musculus GN=Got2 PE=1 SV=1	29	26
Sarcoplasmic/endoplasmic reticulum calcium ATPase 2 OS=Mus musculus GN=Atp2a2 PE=1 SV=2	29	30
Golgi apparatus protein 1 (Fragment) OS=Mus musculus GN=Glg1 PE=1 SV=1	28	23
Actin, cytoplasmic 1 OS=Mus musculus GN=Actb PE=1 SV=1	28	24
Uncharacterized protein OS=Mus musculus GN=Snd1 PE=2 SV=1	28	25
Serine hydroxymethyltransferase OS=Mus musculus GN=Shmt2 PE=2 SV=1	28	28
Very long-chain specific acyl-CoA dehydrogenase, mitochondrial OS=Mus musculus GN=Acadvl PE=1 SV=3	28	30
Unconventional myosin-Ic OS=Mus musculus GN=Myo1c PE=1 SV=2	28	30
Calcium-binding mitochondrial carrier protein Aralar1 OS=Mus musculus GN=Slc25a12 PE=1 SV=1	27	22
Pyruvate kinase PKM OS=Mus musculus GN=Pkm PE=1 SV=4	27	23
Calreticulin OS=Mus musculus GN=Calr PE=1 SV=1	27	26
High density lipoprotein (HDL) binding protein, isoform CRA_d OS=Mus musculus GN=Hdlbp PE=1 SV=1	27	30
Hypoxia up-regulated protein 1 OS=Mus musculus GN=Hyou1 PE=1 SV=1	26	19
Annexin A2 OS=Mus musculus GN=Anxa2 PE=1 SV=2	26	24
Isocitrate dehydrogenase [NADP], mitochondrial OS=Mus musculus GN=Idh2 PE=1 SV=3	26	25
Succinate dehydrogenase [ubiquinone] flavoprotein subunit, mitochondrial OS=Mus musculus GN=Sdha PE=1 SV=1	26	25
Uncharacterized protein OS=Mus musculus GN=Pck2 PE=2 SV=1	26	25
Aldehyde dehydrogenase, mitochondrial OS=Mus musculus GN=Aldh2 PE=1 SV=1	26	25
Heat shock cognate 71 kDa protein OS=Mus musculus GN=Hspa8 PE=1 SV=1	26	26
Dolichyl-diphosphooligosaccharide--protein glycosyltransferase subunit 1 OS=Mus musculus GN=Rpn1 PE=2 SV=1	26	26
Sodium/potassium-transporting ATPase subunit alpha-1 OS=Mus musculus GN=Atp1a1 PE=1 SV=1	26	27
Plasma membrane calcium-transporting ATPase 1 OS=Mus musculus GN=Atp2b1 PE=1 SV=1	26	31
Laminin B1 subunit 1 OS=Mus musculus GN=Lamb1 PE=2 SV=1	25	20
Ornithine aminotransferase, mitochondrial OS=Mus musculus GN=Oat PE=1 SV=1	25	22
ADP/ATP translocase 1 OS=Mus musculus GN=Slc25a4 PE=1 SV=4	24	18
Septin-7 OS=Mus musculus GN=Sept7 PE=1 SV=2	24	19
NADPH--cytochrome P450 reductase OS=Mus musculus GN=Por PE=1 SV=2	24	21
Presequence protease, mitochondrial OS=Mus musculus GN=Pitrm1 PE=1 SV=1	24	21
Uncharacterized protein OS=Mus musculus GN=Serpinh1 PE=2 SV=1	24	22
Elongation factor Tu, mitochondrial OS=Mus musculus GN=Tufm PE=1 SV=1	24	22
NADH-ubiquinone oxidoreductase 75 kDa subunit, mitochondrial OS=Mus musculus GN=Ndufs1 PE=1 SV=2	24	22
NAD(P) transhydrogenase, mitochondrial OS=Mus musculus GN=Nnt PE=1 SV=2	24	25
Ankycorbin OS=Mus musculus GN=Rai14 PE=1 SV=1	24	25
Fructose-bisphosphate aldolase A OS=Mus musculus GN=Aldoa PE=1 SV=2	24	26
Glutaminase kidney isoform, mitochondrial OS=Mus musculus GN=Gls PE=1 SV=1	23	20
Epoxide hydrolase 1 OS=Mus musculus GN=Ephx1 PE=1 SV=2	23	21
Putative gag-pol protein OS=Mus musculus GN=gag-pol PE=4 SV=1	23	21
3-ketoacyl-CoA thiolase, mitochondrial OS=Mus musculus GN=Acaa2 PE=1 SV=3	23	22
Aspartyl/asparaginyl beta-hydroxylase OS=Mus musculus GN=Asph PE=1 SV=1	23	22
Phosphoglycerate kinase 1 OS=Mus musculus GN=Pgk1 PE=1 SV=4	23	23
Septin-9 OS=Mus musculus GN=Sept9 PE=1 SV=1	23	23
Catenin alpha-1 OS=Mus musculus GN=Ctnna1 PE=1 SV=1	23	25
Desmoplakin OS=Mus musculus GN=Dsp PE=1 SV=1	23	28
Fatty acid synthase OS=Mus musculus GN=Fasn PE=1 SV=2	23	35
Ogdhl protein OS=Mus musculus GN=Ogdhl PE=2 SV=1	22	19
Acyl-coenzyme A thioesterase 9, mitochondrial OS=Mus musculus GN=Acot9 PE=1 SV=1	22	20
Dystonin OS=Mus musculus GN=Dst PE=1 SV=1	22	20
Malate dehydrogenase, mitochondrial OS=Mus musculus GN=Mdh2 PE=1 SV=3	22	21
Uncharacterized protein OS=Mus musculus GN=Rpl3 PE=2 SV=1	22	21
ATP synthase subunit beta, mitochondrial OS=Mus musculus GN=Atp5b PE=1 SV=2	22	22
Keratin, type I cytoskeletal 17 OS=Mus musculus GN=Krt17 PE=1 SV=3	22	22
Complement C3 OS=Mus musculus GN=C3 PE=1 SV=3	22	24
Hexokinase 1, isoform CRA_f OS=Mus musculus GN=Hk1 PE=1 SV=1	22	24
Transitional endoplasmic reticulum ATPase OS=Mus musculus GN=Vcp PE=1 SV=4	22	26
Lanosterol 14-alpha demethylase OS=Mus musculus GN=Cyp51a1 PE=1 SV=1	21	20
Trifunctional enzyme subunit beta, mitochondrial OS=Mus musculus GN=Hadhb PE=1 SV=1	21	20
Glutamyl-prolyl-tRNA synthetase OS=Mus musculus GN=Eprs PE=2 SV=1	21	34
Pyruvate carboxylase OS=Mus musculus GN=Pcx PE=1 SV=1	20	14
Procollagen-lysine,2-oxoglutarate 5-dioxygenase 3 OS=Mus musculus GN=Plod3 PE=1 SV=1	20	15
Succinyl-CoA:3-ketoacid-coenzyme A transferase OS=Mus musculus GN=Oxct1 PE=2 SV=1	20	18
Heat shock protein HSP 90-alpha OS=Mus musculus GN=Hsp90aa1 PE=1 SV=4	20	18
Dynamin-like 120 kDa protein, mitochondrial OS=Mus musculus GN=Opa1 PE=1 SV=1	20	18
Peroxiredoxin-1 OS=Mus musculus GN=Prdx1 PE=1 SV=1	20	19
Thioredoxin domain-containing protein 5 OS=Mus musculus GN=Txndc5 PE=1 SV=1	20	19
Procollagen-lysine,2-oxoglutarate 5-dioxygenase 1 OS=Mus musculus GN=Plod1 PE=1 SV=1	20	19
Glyceraldehyde-3-phosphate dehydrogenase OS=Mus musculus GN=GAPDH PE=2 SV=1	20	20
Uncharacterized protein OS=Mus musculus GN=Sqor PE=2 SV=1	20	20
Alpha-actinin-1 OS=Mus musculus GN=Actn1 PE=1 SV=1	20	20
Nucleobindin-1 OS=Mus musculus GN=Nucb1 PE=1 SV=2	20	20
Laminin subunit gamma-1 OS=Mus musculus GN=Lamc1 PE=1 SV=1	20	20
Chaperonin subunit 8 (Theta), isoform CRA_a OS=Mus musculus GN=Cct8 PE=1 SV=1	20	21
Polyadenylate-binding protein 1 OS=Mus musculus GN=Pabpc1 PE=1 SV=2	20	23
Protein disulfide-isomerase A5 OS=Mus musculus GN=Pdia5 PE=1 SV=1	19	16
Dihydrolipoyllysine-residue acetyltransferase component of pyruvate dehydrogenase complex, mitochondrial OS=Mus musculus GN=Dlat PE=1 SV=2	19	16
Nucleolin OS=Mus musculus GN=Ncl PE=1 SV=2	19	17
Catenin delta-1 OS=Mus musculus GN=Ctnnd1 PE=1 SV=2	19	17
Acetyl-CoA acetyltransferase, mitochondrial OS=Mus musculus GN=Acat1 PE=1 SV=1	19	18
Annexin A1 OS=Mus musculus GN=Anxa1 PE=1 SV=2	19	18
Transport and Golgi organization protein 1 homolog OS=Mus musculus GN=Mia3 PE=1 SV=2	19	18
Prolyl 4-hydroxylase subunit alpha-1 OS=Mus musculus GN=P4ha1 PE=1 SV=2	19	19
Amine oxidase [flavin-containing] A OS=Mus musculus GN=Maoa PE=1 SV=3	19	19
Uncharacterized protein OS=Mus musculus GN=Uqcrc1 PE=2 SV=1	19	20
Calnexin OS=Mus musculus GN=Canx PE=1 SV=1	19	21
Alpha-enolase OS=Mus musculus GN=Eno1 PE=1 SV=3	19	21
MKIAA0719 protein (Fragment) OS=Mus musculus GN=Tomm70a PE=2 SV=1	19	21
C-1-tetrahydrofolate synthase, cytoplasmic OS=Mus musculus GN=Mthfd1 PE=1 SV=4	19	21
Plexin-B2 OS=Mus musculus GN=Plxnb2 PE=1 SV=1	19	21
Nodal modulator 1 OS=Mus musculus GN=Nomo1 PE=1 SV=1	19	24
Tensin 1 OS=Mus musculus GN=Tns1 PE=1 SV=1	18	12
Prostacyclin synthase OS=Mus musculus GN=Ptgis PE=1 SV=1	18	14
Peroxisomal multifunctional enzyme type 2 OS=Mus musculus GN=Hsd17b4 PE=1 SV=3	18	15
Cytochrome b-c1 complex subunit 2, mitochondrial OS=Mus musculus GN=Uqcrc2 PE=1 SV=1	18	16
Caldesmon 1 OS=Mus musculus GN=Cald1 PE=1 SV=1	18	16
Arginine--tRNA ligase, cytoplasmic OS=Mus musculus GN=Rars PE=1 SV=2	18	16
Tubulin alpha chain OS=Mus musculus GN=Tuba1c PE=2 SV=1	18	17
Procollagen galactosyltransferase 1 OS=Mus musculus GN=Colgalt1 PE=1 SV=2	18	17
Fibulin-2 OS=Mus musculus GN=Fbln2 PE=1 SV=2	18	17
Cytosol aminopeptidase OS=Mus musculus GN=Lap3 PE=1 SV=3	18	17
Alpha-mannosidase 2 OS=Mus musculus GN=Man2a1 PE=1 SV=2	18	17
Alpha v integrin OS=Mus musculus GN=Itgav PE=2 SV=1	18	18
Elongation factor 1-alpha 1 OS=Mus musculus GN=Eef1a1 PE=1 SV=3	18	19
Keratin, type II cytoskeletal 6A OS=Mus musculus GN=Krt6a PE=1 SV=3	18	19
Uncharacterized protein OS=Mus musculus GN=Rps3 PE=2 SV=1	18	19
Gelsolin, isoform CRA_c OS=Mus musculus GN=Gsn PE=2 SV=1	18	21
Reticulon-4 OS=Mus musculus GN=Rtn4 PE=1 SV=2	18	22
AP-2 complex subunit alpha-1 OS=Mus musculus GN=Ap2a1 PE=1 SV=1	18	22
Coatomer subunit alpha OS=Mus musculus GN=Copa PE=1 SV=2	18	25
Oxygen-dependent coproporphyrinogen-III oxidase, mitochondrial OS=Mus musculus GN=Cpox PE=1 SV=2	17	10
Mitochondrial-processing peptidase subunit alpha OS=Mus musculus GN=Pmpca PE=1 SV=1	17	12
DnaJ homolog subfamily C member 10 OS=Mus musculus GN=Dnajc10 PE=1 SV=2	17	12
Short-chain specific acyl-CoA dehydrogenase, mitochondrial OS=Mus musculus GN=Acads PE=1 SV=2	17	13
Elongation factor G, mitochondrial OS=Mus musculus GN=Gfm1 PE=1 SV=1	17	13
Isocitrate dehydrogenase [NAD] subunit, mitochondrial OS=Mus musculus GN=Idh3b PE=1 SV=1	17	13
Voltage-dependent anion-selective channel protein 1 OS=Mus musculus GN=Vdac1 PE=1 SV=3	17	14
Prohibitin-2 OS=Mus musculus GN=Phb2 PE=1 SV=1	17	14
Long-chain specific acyl-CoA dehydrogenase, mitochondrial OS=Mus musculus GN=Acadl PE=1 SV=2	17	14
Ribosomal protein L4 OS=Mus musculus GN=Rpl4 PE=1 SV=1	17	14
Fumarate hydratase, mitochondrial OS=Mus musculus GN=Fh PE=1 SV=3	17	14
Uncharacterized protein OS=Mus musculus GN=Sgpl1 PE=2 SV=1	17	14
MCG11348 OS=Mus musculus GN=Rpl7a PE=1 SV=1	17	16
Erythrocyte protein band 4.1-like 2 OS=Mus musculus GN=Epb41l2 PE=2 SV=1	17	20
Electron transfer flavoprotein-ubiquinone oxidoreductase, mitochondrial OS=Mus musculus GN=Etfdh PE=1 SV=1	16	11
NADH dehydrogenase [ubiquinone] flavoprotein 1, mitochondrial OS=Mus musculus GN=Ndufv1 PE=1 SV=1	16	11
Peptidyl-prolyl cis-trans isomerase B OS=Mus musculus GN=Ppib PE=1 SV=2	16	12
NAD-dependent malic enzyme, mitochondrial OS=Mus musculus GN=Me2 PE=1 SV=1	16	12
Extended synaptotagmin-1 OS=Mus musculus GN=Esyt1 PE=1 SV=2	16	12
Prolyl 3-hydroxylase 1 OS=Mus musculus GN=P3h1 PE=1 SV=1	16	13
Isoleucine--tRNA ligase, mitochondrial OS=Mus musculus GN=Iars2 PE=1 SV=1	16	13
130kDa Protein 4.1B MEF cell isoform OS=Mus musculus GN=Epb41l3 PE=1 SV=1	16	13
Protein disulfide-isomerase A6 OS=Mus musculus GN=Pdia6 PE=1 SV=3	16	14
Uncharacterized protein OS=Mus musculus GN=P4ha2 PE=2 SV=1	16	14
Alkylglycerone-phosphate synthase OS=Mus musculus GN=Agps PE=1 SV=1	16	14
Citrate synthase, mitochondrial OS=Mus musculus GN=Cs PE=1 SV=1	16	15
Dihydrolipoyl dehydrogenase, mitochondrial OS=Mus musculus GN=Dld PE=1 SV=2	16	16
Eukaryotic initiation factor 4A-I OS=Mus musculus GN=Eif4a1 PE=1 SV=1	16	16
Phosphate carrier protein, mitochondrial OS=Mus musculus GN=Slc25a3 PE=1 SV=1	16	17
Septin-11 OS=Mus musculus GN=Sept11 PE=1 SV=1	16	17
Peptidyl-prolyl cis-trans isomerase FKBP10 OS=Mus musculus GN=Fkbp10 PE=1 SV=2	16	17
ATP-citrate synthase OS=Mus musculus GN=Acly PE=1 SV=1	16	17
AHNAK nucleoprotein 2 (Fragment) OS=Mus musculus GN=Ahnak2 PE=1 SV=1	16	18
Proliferation-associated protein 2G4 OS=Mus musculus GN=Pa2g4 PE=1 SV=3	16	18
Microtubule-associated protein 4 OS=Mus musculus GN=Map4 PE=1 SV=3	16	19
Methylmalonyl-CoA mutase, mitochondrial OS=Mus musculus GN=Mut PE=1 SV=2	16	19
AP-2 complex subunit beta OS=Mus musculus GN=Ap2b1 PE=1 SV=1	16	23
Uncharacterized protein OS=Mus musculus GN=Rpl8 PE=2 SV=1	15	9
Electron transfer flavoprotein subunit beta OS=Mus musculus GN=Etfb PE=1 SV=3	15	10
RAB2, member RAS oncogene family OS=Mus musculus GN=Rab2a PE=1 SV=1	15	11
AFG3-like protein 2 OS=Mus musculus GN=Afg3l2 PE=1 SV=1	15	11
Prohibitin OS=Mus musculus GN=Phb PE=1 SV=1	15	12
Mannosyl-oligosaccharide glucosidase OS=Mus musculus GN=Mogs PE=1 SV=1	15	12
Ddx3x protein OS=Mus musculus GN=Ddx3x PE=2 SV=1	15	13
EH domain-containing protein 2 OS=Mus musculus GN=Ehd2 PE=1 SV=1	15	13
Voltage-dependent anion-selective channel protein 2 OS=Mus musculus GN=Vdac2 PE=1 SV=1	15	14
40S ribosomal protein S3a OS=Mus musculus GN=Rps3a1 PE=2 SV=1	15	14
Adenylyl cyclase-associated protein OS=Mus musculus GN=Cap1 PE=2 SV=1	15	14
Collagen alpha-1(VI) chain OS=Mus musculus GN=Col6a1 PE=1 SV=1	15	14
UDP-glucose 6-dehydrogenase OS=Mus musculus GN=Ugdh PE=2 SV=1	15	14
Guanine nucleotide-binding protein G(i) subunit alpha-2 OS=Mus musculus GN=Gnai2 PE=1 SV=5	15	15
Glucosidase 2 subunit beta OS=Mus musculus GN=Prkcsh PE=1 SV=1	15	15
Isocitrate dehydrogenase [NAD] subunit, mitochondrial OS=Mus musculus GN=Idh3a PE=1 SV=1	15	15
Mitochondrial proton/calcium exchanger protein OS=Mus musculus GN=Letm1 PE=1 SV=1	15	15
Prostaglandin F2 receptor negative regulator OS=Mus musculus GN=Ptgfrn PE=1 SV=2	15	15
Electron transfer flavoprotein subunit alpha, mitochondrial OS=Mus musculus GN=Etfa PE=1 SV=2	15	16
17beta-hydroxysteroid dehydrogenase type 10/short chain L-3-hydroxyacyl-CoA dehydrogenase OS=Mus musculus GN=Hsd17b10 PE=1 SV=1	15	16
Pyruvate dehydrogenase E1 component subunit alpha, somatic form, mitochondrial OS=Mus musculus GN=Pdha1 PE=1 SV=1	15	16
MCG130610 OS=Mus musculus GN=Rab7 PE=1 SV=1	15	16
Septin-2 OS=Mus musculus GN=Sept2 PE=1 SV=2	15	16
D-3-phosphoglycerate dehydrogenase OS=Mus musculus GN=Phgdh PE=1 SV=3	15	16
Eukaryotic translation initiation factor 4 gamma 1 OS=Mus musculus GN=Eif4g1 PE=1 SV=1	15	17
Receptor of activated protein C kinase 1 OS=Mus musculus GN=Rack1 PE=1 SV=3	15	18
EH domain-containing protein 1 OS=Mus musculus GN=Ehd1 PE=1 SV=1	15	18
Kinesin-1 heavy chain OS=Mus musculus GN=Kif5b PE=1 SV=3	15	18
T-complex protein 1 subunit gamma OS=Mus musculus GN=Cct3 PE=1 SV=1	15	19
Tankyrase 1 binding protein 1 OS=Mus musculus GN=Tnks1bp1 PE=2 SV=1	15	19
Catalase OS=Mus musculus GN=Cat PE=2 SV=1	15	20
Valyl-tRNA synthetase 2, isoform CRA_b OS=Mus musculus GN=Vars PE=1 SV=1	15	20
Vesicle-fusing ATPase OS=Mus musculus GN=Nsf PE=1 SV=2	15	22
Vinculin OS=Mus musculus GN=Vcl PE=1 SV=4	15	22
Hydroxyacyl-coenzyme A dehydrogenase, mitochondrial OS=Mus musculus GN=Hadh PE=1 SV=2	14	10
DnaJ (Hsp40) homolog, subfamily A, member 3, isoform CRA_b OS=Mus musculus GN=Dnaja3 PE=2 SV=1	14	10
28S ribosomal protein S30, mitochondrial OS=Mus musculus GN=Mrps30 PE=1 SV=1	14	10
ATP synthase subunit O, mitochondrial OS=Mus musculus GN=Atp5o PE=1 SV=1	14	11
60S acidic ribosomal protein P0 OS=Mus musculus GN=Rplp0 PE=2 SV=1	14	11
Uncharacterized protein OS=Mus musculus GN=Cct7 PE=2 SV=1	14	11
Uncharacterized protein OS=Mus musculus GN=Vdac3 PE=2 SV=1	14	12
Acyl-CoA thioesterase 2 OS=Mus musculus GN=Acot2 PE=2 SV=1	14	12
Prostaglandin G/H synthase 1 OS=Mus musculus GN=Ptgs1 PE=1 SV=1	14	12
Lanosterol synthase OS=Mus musculus GN=Lss PE=1 SV=2	14	12
Fibronectin type III domain-containing protein 3B OS=Mus musculus GN=Fndc3b PE=1 SV=1	14	12
Tln2 protein OS=Mus musculus GN=Tln2 PE=2 SV=1	14	12
Elongation factor 1-gamma OS=Mus musculus GN=Eef1g PE=1 SV=3	14	13
Pyruvate dehydrogenase E1 component subunit beta, mitochondrial OS=Mus musculus GN=Pdhb PE=1 SV=1	14	13
Caveolae-associated protein 1 OS=Mus musculus GN=Cavin1 PE=1 SV=1	14	14
Metalloreductase STEAP3 OS=Mus musculus GN=Steap3 PE=1 SV=1	14	14
Non-specific lipid-transfer protein OS=Mus musculus GN=Scp2 PE=1 SV=3	14	14
Transducin beta-like protein 2 OS=Mus musculus GN=Tbl2 PE=1 SV=2	14	14
Chaperonin subunit 2 (Beta), isoform CRA_a OS=Mus musculus GN=Cct2 PE=1 SV=1	14	14
Calumenin OS=Mus musculus GN=Calu PE=1 SV=1	14	15
Mitochondrial-processing peptidase subunit beta OS=Mus musculus GN=Pmpcb PE=1 SV=1	14	15
Succinate--CoA ligase [GDP-forming] subunit beta, mitochondrial OS=Mus musculus GN=Suclg2 PE=1 SV=3	14	15
Long-chain-fatty-acid--CoA ligase 3 OS=Mus musculus GN=Acsl3 PE=1 SV=2	14	15
C230096C10Rik protein OS=Mus musculus GN=Emc1 PE=2 SV=1	14	15
Insulin-like growth factor 2 receptor OS=Mus musculus GN=Igf2r PE=2 SV=1	14	15
Uncharacterized protein OS=Mus musculus GN=Vat1 PE=2 SV=1	14	16
Plastin-3 (Fragment) OS=Mus musculus GN=Pls3 PE=1 SV=1	14	16
NADH-cytochrome b5 reductase 3 OS=Mus musculus GN=Cyb5r3 PE=1 SV=3	14	17
40S ribosomal protein S4 OS=Mus musculus GN=Rps4x PE=1 SV=1	14	17
Junction plakoglobin OS=Mus musculus GN=Jup PE=1 SV=3	14	17
Heterogeneous nuclear ribonucleoprotein Q OS=Mus musculus GN=Syncrip PE=1 SV=1	14	17
Niban-like protein 1 OS=Mus musculus GN=Fam129b PE=1 SV=2	14	18
Unconventional myosin-Ib OS=Mus musculus GN=Myo1b PE=1 SV=3	14	19
Collagen alpha-1(XVI) chain OS=Mus musculus GN=Col16a1 PE=1 SV=2	13	7
Polypeptide N-acetylgalactosaminyltransferase (Fragment) OS=Mus musculus GN=Galnt2 PE=2 SV=1	13	9
Sideroflexin-3 OS=Mus musculus GN=Sfxn3 PE=1 SV=1	13	10
Uncharacterized protein OS=Mus musculus GN=Rpl7 PE=2 SV=1	13	10
Protein LYRIC OS=Mus musculus GN=Mtdh PE=1 SV=1	13	10
Short/branched chain specific acyl-CoA dehydrogenase, mitochondrial OS=Mus musculus GN=Acadsb PE=1 SV=1	13	10
ATPase family AAA domain-containing protein 3 OS=Mus musculus GN=Atad3 PE=1 SV=1	13	10
Protein-lysine 6-oxidase OS=Mus musculus GN=Lox PE=1 SV=1	13	11
3-ketoacyl-CoA thiolase A, peroxisomal OS=Mus musculus GN=Acaa1a PE=1 SV=1	13	11
Transmembrane protein 43 OS=Mus musculus GN=Tmem43 PE=1 SV=1	13	11
WD repeat domain 1 OS=Mus musculus GN=Wdr1 PE=1 SV=1	13	11
Cysteine desulfurase, mitochondrial OS=Mus musculus GN=Nfs1 PE=1 SV=3	13	11
Procollagen-lysine,2-oxoglutarate 5-dioxygenase 2 OS=Mus musculus GN=Plod2 PE=1 SV=1	13	11
Phosphatidylinositide phosphatase SAC1 OS=Mus musculus GN=Sacm1l PE=1 SV=1	13	12
Methylmalonate-semialdehyde dehydrogenase [acylating], mitochondrial OS=Mus musculus GN=Aldh6a1 PE=1 SV=1	13	12
Dolichyl-diphosphooligosaccharide--protein glycosyltransferase subunit 2 OS=Mus musculus GN=Rpn2 PE=1 SV=1	13	13
Uncharacterized protein OS=Mus musculus GN=Rps2 PE=2 SV=1	13	13
Carnitine O-palmitoyltransferase 2, mitochondrial OS=Mus musculus GN=Cpt2 PE=1 SV=2	13	13
Apoptosis-inducing factor 1, mitochondrial OS=Mus musculus GN=Aifm1 PE=1 SV=1	13	13
Sorting and assembly machinery component 50 homolog OS=Mus musculus GN=Samm50 PE=1 SV=1	13	13
Carbonyl reductase [NADPH] 2 OS=Mus musculus GN=Cbr2 PE=1 SV=1	13	14
Protein ERGIC-53 OS=Mus musculus GN=Lman1 PE=1 SV=1	13	14
Protein transport protein Sec31A OS=Mus musculus GN=Sec31a PE=1 SV=2	13	14
Integrin beta-1 OS=Mus musculus GN=Itgb1 PE=1 SV=1	13	15
Transketolase OS=Mus musculus GN=Tkt PE=1 SV=1	13	16
Actin-related protein 3 OS=Mus musculus GN=Actr3 PE=1 SV=3	13	17
NADPH:adrenodoxin oxidoreductase, mitochondrial OS=Mus musculus GN=Fdxr PE=1 SV=1	12	6
Gamma-aminobutyraldehyde dehydrogenase OS=Mus musculus GN=Aldh9a1 PE=2 SV=1	12	7
39S ribosomal protein L37, mitochondrial OS=Mus musculus GN=Mrpl37 PE=1 SV=1	12	8
Arginine-rich, mutated in early stage tumors, isoform CRA_b OS=Mus musculus GN=Manf PE=1 SV=1	12	9
3-hydroxyisobutyrate dehydrogenase, mitochondrial OS=Mus musculus GN=Hibadh PE=1 SV=1	12	9
Heme oxygenase 2 OS=Mus musculus GN=Hmox2 PE=1 SV=1	12	9
[Pyruvate dehydrogenase (acetyl-transferring)] kinase isozyme 3, mitochondrial OS=Mus musculus GN=Pdk3 PE=1 SV=1	12	9
Acyl-Coenzyme A dehydrogenase family, member 8 OS=Mus musculus GN=Acad8 PE=1 SV=1	12	9
Succinate-CoA ligase subunit beta (Fragment) OS=Mus musculus GN=Sucla2 PE=2 SV=1	12	9
Alanine aminotransferase 2 OS=Mus musculus GN=Gpt2 PE=1 SV=1	12	9
Septin-8 OS=Mus musculus GN=Sept8 PE=1 SV=1	12	9
Nucleobindin-2 OS=Mus musculus GN=Nucb2 PE=1 SV=2	12	9
Mitochondrial carrier homolog 2 OS=Mus musculus GN=Mtch2 PE=1 SV=1	12	10
Reticulocalbin-1 OS=Mus musculus GN=Rcn1 PE=1 SV=1	12	10
Collagen alpha-2(VI) chain OS=Mus musculus GN=Col6a2 PE=1 SV=3	12	10
Uncharacterized protein OS=Mus musculus GN=Rpl5 PE=2 SV=1	12	11
Guanine nucleotide-binding protein G(I)/G(S)/G(T) subunit beta-1 OS=Mus musculus GN=Gnb1 PE=1 SV=3	12	11
GrpE protein homolog 1, mitochondrial OS=Mus musculus GN=Grpel1 PE=1 SV=1	12	11
Actin-related protein 2 OS=Mus musculus GN=Actr2 PE=1 SV=1	12	11
Septin-5 OS=Mus musculus GN=Sept5 PE=1 SV=2	12	11
Collagen alpha-2(V) chain OS=Mus musculus GN=Col5a2 PE=1 SV=1	12	11
Lysine--tRNA ligase OS=Mus musculus GN=Kars PE=1 SV=1	12	11
2-amino-3-ketobutyrate coenzyme A ligase, mitochondrial OS=Mus musculus GN=Gcat PE=1 SV=2	12	11
Calcium-binding mitochondrial carrier protein Aralar2 OS=Mus musculus GN=Slc25a13 PE=1 SV=1	12	11
2-oxoisovalerate dehydrogenase subunit alpha, mitochondrial OS=Mus musculus GN=Bckdha PE=1 SV=1	12	11
Peroxiredoxin-4 OS=Mus musculus GN=Prdx4 PE=1 SV=1	12	12
ATP synthase subunit gamma, mitochondrial OS=Mus musculus GN=Atp5c1 PE=1 SV=1	12	12
Peptidyl-prolyl cis-trans isomerase FKBP9 OS=Mus musculus GN=Fkbp9 PE=1 SV=1	12	12
4F2 cell-surface antigen heavy chain OS=Mus musculus GN=Slc3a2 PE=1 SV=1	12	12
Procollagen C-endopeptidase enhancer 1 OS=Mus musculus GN=Pcolce PE=1 SV=1	12	12
14-3-3 protein epsilon OS=Mus musculus GN=Ywhae PE=1 SV=1	12	12
Medium-chain specific acyl-CoA dehydrogenase, mitochondrial OS=Mus musculus GN=Acadm PE=1 SV=1	12	12
Sterol-4-alpha-carboxylate 3-dehydrogenase, decarboxylating OS=Mus musculus GN=Nsdhl PE=1 SV=1	12	12
ATP-binding cassette, sub-family D (ALD), member 3 OS=Mus musculus GN=Abcd3 PE=2 SV=1	12	12
DnaJ homolog subfamily C member 11 OS=Mus musculus GN=Dnajc11 PE=1 SV=2	12	12
Enoyl-CoA hydratase, mitochondrial OS=Mus musculus GN=Echs1 PE=1 SV=1	12	13
Coatomer subunit beta OS=Mus musculus GN=Copb1 PE=1 SV=1	12	13
Programmed cell death 6-interacting protein OS=Mus musculus GN=Pdcd6ip PE=1 SV=3	12	13
Prelamin-A/C OS=Mus musculus GN=Lmna PE=1 SV=2	12	13
Coatomer subunit beta' OS=Mus musculus GN=Copb2 PE=1 SV=2	12	13
RAB14 protein OS=Mus musculus GN=Rab14 PE=1 SV=1	12	14
ERO1-like protein alpha OS=Mus musculus GN=Ero1a PE=1 SV=2	12	14
Coiled-coil domain-containing protein 47 OS=Mus musculus GN=Ccdc47 PE=1 SV=2	12	14
Cordon-bleu protein-like 1 OS=Mus musculus GN=Cobll1 PE=1 SV=1	12	14
V-type proton ATPase catalytic subunit A OS=Mus musculus GN=Atp6v1a PE=1 SV=2	12	15
Heterogeneous nuclear ribonucleoprotein K OS=Mus musculus GN=Hnrnpk PE=1 SV=1	12	15
Heat shock 70 kDa protein 4 OS=Mus musculus GN=Hspa4 PE=1 SV=1	12	16
Tyrosine--tRNA ligase OS=Mus musculus GN=Yars PE=1 SV=1	12	21
ATP synthase F(0) complex subunit B1, mitochondrial OS=Mus musculus GN=Atp5f1 PE=1 SV=1	11	7
Uncharacterized protein OS=Mus musculus GN=Mrpl39 PE=2 SV=1	11	7
Nicalin OS=Mus musculus GN=Ncln PE=1 SV=1	11	7
MKIAA4032 protein (Fragment) OS=Mus musculus GN=Mfn1 PE=2 SV=1	11	7
40S ribosomal protein S7 OS=Mus musculus GN=Rps7 PE=2 SV=1	11	8
A-kinase anchor protein 9 OS=Mus musculus GN=Akap9 PE=1 SV=1	11	8
Ribosomal protein 10 OS=Mus musculus GN=RP23-436K3.4-001 PE=4 SV=1	11	9
Vesicle-trafficking protein SEC22b OS=Mus musculus GN=Sec22b PE=1 SV=3	11	9
Calcium-binding mitochondrial carrier protein SCaMC-1 OS=Mus musculus GN=Slc25a24 PE=1 SV=1	11	9
Transcription factor A, mitochondrial OS=Mus musculus GN=Tfam PE=1 SV=1	11	9
Neurolysin, mitochondrial OS=Mus musculus GN=Nln PE=1 SV=1	11	9
MFLJ00139 protein (Fragment) OS=Mus musculus GN=Micall2 PE=2 SV=1	11	9
Dihydropyrimidinase-related protein 3 OS=Mus musculus GN=Dpysl3 PE=1 SV=1	11	9
Peptidyl-prolyl cis-trans isomerase A OS=Mus musculus GN=Ppia PE=1 SV=2	11	10
Isocitrate dehydrogenase [NAD] subunit gamma 1, mitochondrial OS=Mus musculus GN=Idh3g PE=1 SV=1	11	10
T-complex protein 1 subunit epsilon OS=Mus musculus GN=Cct5 PE=1 SV=1	11	10
Rab GDP dissociation inhibitor beta OS=Mus musculus GN=Gdi2 PE=1 SV=1	11	10
Uncharacterized protein OS=Mus musculus GN=Aars PE=2 SV=1	11	10
E3 UFM1-protein ligase 1 OS=Mus musculus GN=Ufl1 PE=1 SV=2	11	10
Predicted gene 20425 OS=Mus musculus GN=Gm20425 PE=4 SV=1	11	10
Inhibitor of nuclear factor kappa-B kinase-interacting protein OS=Mus musculus GN=Ikbip PE=1 SV=1	11	10
Vesicle-associated membrane protein-associated protein A OS=Mus musculus GN=Vapa PE=1 SV=2	11	11
Dolichyl-diphosphooligosaccharide--protein glycosyltransferase 48 kDa subunit OS=Mus musculus GN=Ddost PE=1 SV=2	11	11
Phosphoglycerate mutase 1 OS=Mus musculus GN=Pgam1 PE=1 SV=3	11	11
Pyrroline-5-carboxylate reductase 2 OS=Mus musculus GN=Pycr2 PE=1 SV=1	11	11
Acyl-CoA dehydrogenase family member 9, mitochondrial OS=Mus musculus GN=Acad9 PE=1 SV=2	11	11
Very-long-chain 3-oxoacyl-CoA reductase OS=Mus musculus GN=Hsd17b12 PE=1 SV=1	11	11
Growth arrest-specific protein 7 OS=Mus musculus GN=Gas7 PE=1 SV=1	11	11
DEAD (Asp-Glu-Ala-Asp) box polypeptide 5 OS=Mus musculus GN=Ddx5 PE=2 SV=1	11	11
AP-2 complex subunit mu OS=Mus musculus GN=Ap2m1 PE=1 SV=1	11	11
Annexin A3 OS=Mus musculus GN=Anxa3 PE=1 SV=4	11	11
Vesicular integral-membrane protein VIP36 OS=Mus musculus GN=Lman2 PE=1 SV=2	11	11
EGF-containing fibulin-like extracellular matrix protein 1 OS=Mus musculus GN=Efemp1 PE=1 SV=1	11	11
Coronin-1C OS=Mus musculus GN=Coro1c PE=1 SV=2	11	11
Unconventional myosin-Va OS=Mus musculus GN=Myo5a PE=1 SV=1	11	11
Cytochrome c, somatic OS=Mus musculus GN=Cycs PE=1 SV=2	11	12
60S ribosomal protein L6 OS=Mus musculus GN=Rpl6 PE=1 SV=1	11	12
Branched-chain-amino-acid aminotransferase OS=Mus musculus GN=Bcat2 PE=1 SV=1	11	12
Myosin phosphatase Rho-interacting protein OS=Mus musculus GN=Mprip PE=1 SV=2	11	12
Peroxisomal carnitine O-octanoyltransferase OS=Mus musculus GN=Crot PE=1 SV=1	11	12
Cytoskeleton-associated protein 5 OS=Mus musculus GN=Ckap5 PE=1 SV=1	11	12
Leucine-rich repeat-containing protein 59 OS=Mus musculus GN=Lrrc59 PE=1 SV=1	11	13
AP-2 complex subunit alpha-2 OS=Mus musculus GN=Ap2a2 PE=1 SV=2	11	13
Dedicator of cytokinesis protein 7 OS=Mus musculus GN=Dock7 PE=1 SV=1	11	15
Xanthine dehydrogenase/oxidase OS=Mus musculus GN=Xdh PE=1 SV=5	11	15
von Willebrand factor A domain-containing protein 8 OS=Mus musculus GN=Vwa8 PE=1 SV=2	10	3
Dynamin-1 OS=Mus musculus GN=Dnm1 PE=1 SV=2	10	6
Fatty aldehyde dehydrogenase OS=Mus musculus GN=Aldh3a2 PE=1 SV=2	10	7
KDEL (Lys-Asp-Glu-Leu) containing 2, isoform CRA_b OS=Mus musculus GN=Kdelc2 PE=1 SV=1	10	7
Peptidyl-prolyl cis-trans isomerase C OS=Mus musculus GN=Ppic PE=1 SV=1	10	7
Inorganic pyrophosphatase 2, mitochondrial OS=Mus musculus GN=Ppa2 PE=1 SV=1	10	7
LRP chaperone MESD OS=Mus musculus GN=Mesd PE=1 SV=1	10	8
MCG23457 OS=Mus musculus GN=Rps11 PE=1 SV=1	10	8
Tyrosine--tRNA ligase, mitochondrial OS=Mus musculus GN=Yars2 PE=1 SV=2	10	8
3-hydroxyisobutyryl-CoA hydrolase, mitochondrial OS=Mus musculus GN=Hibch PE=1 SV=1	10	8
Hydroxymethylglutaryl-CoA lyase, mitochondrial OS=Mus musculus GN=Hmgcl PE=1 SV=2	10	8
Golgin subfamily A member 5 OS=Mus musculus GN=Golga5 PE=1 SV=2	10	8
Regulator of nonsense transcripts 1 OS=Mus musculus GN=Upf1 PE=1 SV=2	10	8
Mitochondrial carrier homolog 1 OS=Mus musculus GN=Mtch1 PE=1 SV=1	10	8
MCG23455, isoform CRA_e OS=Mus musculus GN=Rpl13a PE=1 SV=1	10	9
MCG5400 OS=Mus musculus GN=Myl12a PE=1 SV=1	10	9
Pyruvate dehydrogenase protein X component, mitochondrial OS=Mus musculus GN=Pdhx PE=1 SV=1	10	9
Prolyl 3-hydroxylase 3 OS=Mus musculus GN=P3h3 PE=1 SV=1	10	9
Tpm3 protein OS=Mus musculus GN=Tpm3 PE=2 SV=1	10	9
MCG142017, isoform CRA_a OS=Mus musculus GN=Tmtc3 PE=1 SV=1	10	9
Serine (or cysteine) peptidase inhibitor, clade B, member 6a OS=Mus musculus GN=Serpinb6a PE=1 SV=1	10	9
NAD kinase 2, mitochondrial OS=Mus musculus GN=Nadk2 PE=1 SV=2	10	9
Bifunctional purine biosynthesis protein PURH OS=Mus musculus GN=Atic PE=1 SV=2	10	9
Succinate--CoA ligase [ADP/GDP-forming] subunit alpha, mitochondrial OS=Mus musculus GN=Suclg1 PE=1 SV=4	10	10
ADP/ATP translocase 2 OS=Mus musculus GN=Slc25a5 PE=1 SV=3	10	10
Dihydrolipoyllysine-residue succinyltransferase component of 2-oxoglutarate dehydrogenase complex, mitochondrial OS=Mus musculus GN=Dlst PE=1 SV=1	10	10
MCG123443 OS=Mus musculus GN=Rps16 PE=1 SV=1	10	10
Atlastin-3 OS=Mus musculus GN=Atl3 PE=1 SV=1	10	10
Poly(rC)-binding protein 1 OS=Mus musculus GN=Pcbp1 PE=1 SV=1	10	10
H2-D1 protein (Fragment) OS=Mus musculus GN=H2-D1 PE=2 SV=1	10	10
Succinate dehydrogenase [ubiquinone] iron-sulfur subunit, mitochondrial (Fragment) OS=Mus musculus GN=Sdhb PE=2 SV=1	10	10
Uncharacterized protein OS=Mus musculus GN=Lima1 PE=2 SV=1	10	10
Delta(3,5)-Delta(2,4)-dienoyl-CoA isomerase, mitochondrial OS=Mus musculus GN=Ech1 PE=1 SV=1	10	10
Erlin-2 OS=Mus musculus GN=Erlin2 PE=1 SV=1	10	10
Transmembrane protein 214 OS=Mus musculus GN=Tmem214 PE=1 SV=3	10	10
Glutamine--tRNA ligase OS=Mus musculus GN=Qars PE=1 SV=2	10	10
Mitofusin-2 OS=Mus musculus GN=Mfn2 PE=1 SV=3	10	10
10 kDa heat shock protein, mitochondrial OS=Mus musculus GN=Hspe1 PE=1 SV=2	10	11
Adenylate kinase 2, mitochondrial OS=Mus musculus GN=Ak2 PE=1 SV=5	10	11
60S ribosomal protein L18a OS=Mus musculus GN=Rpl18a PE=1 SV=1	10	11
RAB1, member RAS oncogene family, isoform CRA_a OS=Mus musculus GN=Rab1a PE=1 SV=1	10	11
Endoplasmic reticulum resident protein 44 OS=Mus musculus GN=Erp44 PE=1 SV=1	10	11
Alpha-soluble NSF attachment protein OS=Mus musculus GN=Napa PE=1 SV=1	10	11
Tyrosine-protein kinase OS=Mus musculus GN=Jak1 PE=1 SV=1	10	11
Insulin-like growth factor 2 mRNA-binding protein 3 OS=Mus musculus GN=Igf2bp3 PE=1 SV=1	10	12
Dynactin subunit 1 OS=Mus musculus GN=Dctn1 PE=1 SV=3	10	12
Annexin A5 OS=Mus musculus GN=Anxa5 PE=1 SV=1	10	12
Biglycan OS=Mus musculus GN=Bgn PE=1 SV=1	10	12
Integrin alpha-5 OS=Mus musculus GN=Itga5 PE=1 SV=3	10	12
Heterogeneous nuclear ribonucleoprotein U OS=Mus musculus GN=Hnrnpu PE=1 SV=1	10	13
Long-chain-fatty-acid--CoA ligase 1 OS=Mus musculus GN=Acsl1 PE=1 SV=2	10	13
Triosephosphate isomerase OS=Mus musculus GN=Tpi1 PE=1 SV=4	10	14
Annexin A6 OS=Mus musculus GN=Anxa6 PE=1 SV=3	10	15
T-complex protein 1 subunit delta OS=Mus musculus GN=Cct4 PE=2 SV=1	10	17
Monoacylglycerol lipase ABHD12 OS=Mus musculus GN=Abhd12 PE=1 SV=2	9	4
Mitochondrial antiviral-signaling protein OS=Mus musculus GN=Mavs PE=1 SV=1	9	4
Endonuclease domain-containing 1 protein OS=Mus musculus GN=Endod1 PE=1 SV=2	9	5
Haloacid dehalogenase-like hydrolase domain-containing protein 3 OS=Mus musculus GN=Hdhd3 PE=1 SV=1	9	6
Steryl-sulfatase OS=Mus musculus GN=Sts PE=1 SV=1	9	6
Alanine--tRNA ligase, mitochondrial OS=Mus musculus GN=Aars2 PE=1 SV=1	9	6
Pccb protein (Fragment) OS=Mus musculus GN=Pccb PE=2 SV=1	9	6
Disks large homolog 1 OS=Mus musculus GN=Dlg1 PE=1 SV=1	9	6
Stomatin-like protein 2, mitochondrial OS=Mus musculus GN=Stoml2 PE=1 SV=1	9	6
Propionyl-CoA carboxylase alpha chain, mitochondrial OS=Mus musculus GN=Pcca PE=1 SV=2	9	6
Rpl17 protein (Fragment) OS=Mus musculus GN=Rpl17 PE=2 SV=1	9	7
Thioredoxin-dependent peroxide reductase, mitochondrial OS=Mus musculus GN=Prdx3 PE=1 SV=1	9	7
ATP-dependent zinc metalloprotease YME1L1 OS=Mus musculus GN=Yme1l1 PE=1 SV=1	9	7
Follistatin-related protein 1 OS=Mus musculus GN=Fstl1 PE=1 SV=2	9	7
NADH-cytochrome b5 reductase 1 OS=Mus musculus GN=Cyb5r1 PE=1 SV=1	9	7
Prolactin regulatory element-binding protein OS=Mus musculus GN=Preb PE=1 SV=1	9	7
Uncharacterized protein OS=Mus musculus GN=Rpl24 PE=2 SV=1	9	7
Mitochondrial ribosomal protein S9, isoform CRA_b OS=Mus musculus GN=Mrps9 PE=2 SV=1	9	7
28S ribosomal protein S29, mitochondrial OS=Mus musculus GN=Dap3 PE=1 SV=1	9	7
Collagen, type V, alpha 1 OS=Mus musculus GN=Col5a1 PE=1 SV=1	9	7
Ubiquinone biosynthesis monooxygenase COQ6, mitochondrial OS=Mus musculus GN=Coq6 PE=1 SV=3	9	7
Keratin, type I cytoskeletal 10 OS=Mus musculus GN=Krt10 PE=1 SV=1	9	8
Ribosomal protein L23A, pseudogene 3 OS=Mus musculus GN=Rpl23a-ps3 PE=3 SV=1	9	8
Cytochrome c oxidase subunit IV isoform 1 OS=Mus musculus GN=Cox4i1 PE=1 SV=1	9	8
MICOS complex subunit Mic27 OS=Mus musculus GN=Apool PE=1 SV=1	9	8
Malectin OS=Mus musculus GN=Mlec PE=1 SV=2	9	8
Tight junction protein ZO-1 OS=Mus musculus GN=Tjp1 PE=1 SV=1	9	8
Glucose-6-phosphate isomerase OS=Mus musculus GN=Gpi PE=1 SV=4	9	8
Tensin-2 OS=Mus musculus GN=Tns2 PE=1 SV=1	9	8
Sulfite oxidase, mitochondrial OS=Mus musculus GN=Suox PE=1 SV=2	9	8
Long-chain-fatty-acid--CoA ligase 4 OS=Mus musculus GN=Acsl4 PE=1 SV=2	9	8
Bifunctional methylenetetrahydrofolate dehydrogenase/cyclohydrolase, mitochondrial OS=Mus musculus GN=Mthfd2 PE=1 SV=1	9	8
Uncharacterized protein OS=Mus musculus GN=Ppfibp1 PE=2 SV=1	9	8
ATP-dependent (S)-NAD(P)H-hydrate dehydratase OS=Mus musculus GN=Naxd PE=1 SV=1	9	8
Protein flightless-1 homolog OS=Mus musculus GN=Flii PE=1 SV=1	9	8
39S ribosomal protein L1, mitochondrial OS=Mus musculus GN=Mrpl1 PE=1 SV=2	9	8
ATP synthase subunit d, mitochondrial OS=Mus musculus GN=Atp5h PE=1 SV=3	9	9
Transmembrane emp24 domain-containing protein 10 OS=Mus musculus GN=Tmed10 PE=1 SV=1	9	9
MICOS complex subunit Mic19 OS=Mus musculus GN=Chchd3 PE=1 SV=1	9	9
MCG10205 OS=Mus musculus GN=Rps13 PE=1 SV=1	9	9
Mitochondrial 2-oxoglutarate/malate carrier protein OS=Mus musculus GN=Slc25a11 PE=1 SV=3	9	9
Fatty acid-binding protein, epidermal OS=Mus musculus GN=Fabp5 PE=1 SV=3	9	9
Protein canopy homolog 2 OS=Mus musculus GN=Cnpy2 PE=1 SV=1	9	9
2,4-dienoyl-CoA reductase, mitochondrial OS=Mus musculus GN=Decr1 PE=1 SV=1	9	9
PDZ and LIM domain protein 5 OS=Mus musculus GN=Pdlim5 PE=1 SV=4	9	9
MCG116671 OS=Mus musculus GN=Gm11361 PE=3 SV=1	9	9
Alpha-adducin OS=Mus musculus GN=Add1 PE=1 SV=2	9	9
40S ribosomal protein S9 OS=Mus musculus GN=Rps9 PE=1 SV=3	9	9
Cytosolic acyl coenzyme A thioester hydrolase OS=Mus musculus GN=Acot7 PE=1 SV=2	9	9
GTP-binding nuclear protein Ran OS=Mus musculus GN=Ran PE=2 SV=1	9	9
Paralemmin-1 OS=Mus musculus GN=Palm PE=1 SV=1	9	9
Prenylcysteine oxidase OS=Mus musculus GN=Pcyox1 PE=1 SV=1	9	9
Fatty acyl-CoA reductase 1 OS=Mus musculus GN=Far1 PE=1 SV=1	9	9
Mitochondrial Rho GTPase 1 OS=Mus musculus GN=Rhot1 PE=1 SV=1	9	9
E3 ubiquitin-protein ligase OS=Mus musculus GN=Nedd4 PE=1 SV=1	9	9
Extended synaptotagmin-2 OS=Mus musculus GN=Esyt2 PE=1 SV=1	9	9
Unconventional myosin-Id OS=Mus musculus GN=Myo1d PE=1 SV=1	9	9
Signal recognition particle receptor subunit alpha OS=Mus musculus GN=Srpra PE=1 SV=1	9	9
ER membrane protein complex subunit 2 OS=Mus musculus GN=Emc2 PE=1 SV=1	9	9
Uncharacterized protein OS=Mus musculus GN=Cttn PE=2 SV=1	9	9
Ribosomal protein OS=Mus musculus GN=Rpl10a PE=2 SV=1	9	10
40S ribosomal protein S19 OS=Mus musculus GN=Rps19 PE=1 SV=3	9	10
Transgelin-2 OS=Mus musculus GN=Tagln2 PE=1 SV=4	9	10
14-3-3 protein theta OS=Mus musculus GN=Ywhaq PE=1 SV=1	9	10
Translocation protein SEC63 homolog OS=Mus musculus GN=Sec63 PE=1 SV=4	9	10
6-phosphogluconate dehydrogenase, decarboxylating OS=Mus musculus GN=Pgd PE=1 SV=3	9	10
Eukaryotic translation initiation factor 2 subunit 3, X-linked OS=Mus musculus GN=Eif2s3x PE=1 SV=2	9	10
Uncharacterized protein OS=Mus musculus GN=Stt3a PE=2 SV=1	9	10
TRIO and F-actin-binding protein OS=Mus musculus GN=Triobp PE=1 SV=1	9	10
Rho guanine nucleotide exchange factor 2 OS=Mus musculus GN=Arhgef2 PE=1 SV=4	9	10
Protein transport protein Sec23A OS=Mus musculus GN=Sec23a PE=1 SV=1	9	10
Solute carrier family 12 member 2 OS=Mus musculus GN=Slc12a2 PE=1 SV=1	9	11
RAS oncogene family protein OS=Mus musculus GN=Rab11b PE=2 SV=1	9	11
Uncharacterized protein OS=Mus musculus GN=Ddx39b PE=2 SV=1	9	11
tRNA-splicing ligase RtcB homolog OS=Mus musculus GN=Rtcb PE=2 SV=1	9	11
Uncharacterized protein OS=Mus musculus GN=Stip1 PE=2 SV=1	9	11
Isovaleryl-CoA dehydrogenase, mitochondrial OS=Mus musculus GN=Ivd PE=1 SV=1	9	12
General vesicular transport factor p115 OS=Mus musculus GN=Uso1 PE=1 SV=2	9	12
Eukaryotic translation initiation factor 2 subunit 1 OS=Mus musculus GN=Eif2s1 PE=1 SV=3	9	12
Dynamin-1-like protein OS=Mus musculus GN=Dnm1l PE=1 SV=1	9	12
Ephrin type-B receptor 3 OS=Mus musculus GN=Ephb3 PE=1 SV=2	9	12
Proteasome-associated protein ECM29 homolog OS=Mus musculus GN=Ecm29 PE=1 SV=3	9	13
Eukaryotic translation initiation factor 3 subunit A (Fragment) OS=Mus musculus GN=Eif3a PE=2 SV=1	9	13
Cullin-associated NEDD8-dissociated protein 1 OS=Mus musculus GN=Cand1 PE=1 SV=2	9	14
Hexokinase-2 OS=Mus musculus GN=Hk2 PE=1 SV=1	9	15
Glypican-1 OS=Mus musculus GN=Gpc1 PE=1 SV=1	8	2
Uncharacterized protein OS=Mus musculus GN=Mrpl19 PE=2 SV=1	8	4
MCG54027, isoform CRA_a OS=Mus musculus GN=Pdp1 PE=1 SV=2	8	4
MCG10266, isoform CRA_a OS=Mus musculus GN=Rpl9 PE=1 SV=1	8	5
Nucleoporin NDC1 OS=Mus musculus GN=Ndc1 PE=1 SV=1	8	5
Protein arginine methyltransferase NDUFAF7, mitochondrial OS=Mus musculus GN=Ndufaf7 PE=1 SV=4	8	5
Peroxidasin homolog (Drosophila) OS=Mus musculus GN=Pxdn PE=2 SV=1	8	5
Caseinolytic peptidase B protein homolog OS=Mus musculus GN=Clpb PE=1 SV=1	8	5
Serine protease HTRA2, mitochondrial OS=Mus musculus GN=Htra2 PE=1 SV=1	8	5
DnaJ homolog subfamily C member 3 OS=Mus musculus GN=Dnajc3 PE=1 SV=1	8	5
Pgam5 protein (Fragment) OS=Mus musculus GN=Pgam5 PE=2 SV=1	8	6
Platelet-derived growth factor receptor beta OS=Mus musculus GN=Pdgfrb PE=1 SV=1	8	6
Calcium uniporter protein, mitochondrial OS=Mus musculus GN=Mcu PE=1 SV=2	8	6
Acyl-CoA synthetase family member 2, mitochondrial OS=Mus musculus GN=Acsf2 PE=1 SV=1	8	6
Peptidyl-prolyl cis-trans isomerase FKBP11 OS=Mus musculus GN=Fkbp11 PE=1 SV=1	8	6
Dihydroorotate dehydrogenase (quinone), mitochondrial OS=Mus musculus GN=Dhodh PE=1 SV=2	8	6
Reticulocalbin-3 (Fragment) OS=Mus musculus GN=Rcn3 PE=1 SV=1	8	6
Fascin OS=Mus musculus GN=Fscn1 PE=1 SV=4	8	6
Acylglycerol kinase, mitochondrial OS=Mus musculus GN=Agk PE=1 SV=1	8	6
Keratin, type I cytoskeletal 14 OS=Mus musculus GN=Krt14 PE=1 SV=2	8	7
Mitochondrial import receptor subunit TOM40 homolog OS=Mus musculus GN=Tomm40 PE=1 SV=3	8	7
RAS-related C3 botulinum substrate 1 OS=Mus musculus GN=Rac1 PE=1 SV=1	8	7
Enoyl-CoA delta isomerase 1, mitochondrial OS=Mus musculus GN=Eci1 PE=1 SV=2	8	7
IgE-binding protein OS=Mus musculus GN=Iap PE=2 SV=1	8	7
S-methyl-5'-thioadenosine phosphorylase OS=Mus musculus GN=Mtap PE=1 SV=1	8	7
Cysteine-rich with EGF-like domain protein 2 OS=Mus musculus GN=Creld2 PE=1 SV=1	8	7
Timm44 protein (Fragment) OS=Mus musculus GN=Timm44 PE=2 SV=1	8	7
Protein-glutamine gamma-glutamyltransferase 2 OS=Mus musculus GN=Tgm2 PE=1 SV=4	8	7
Serine/threonine-protein phosphatase PP1-alpha catalytic subunit OS=Mus musculus GN=Ppp1ca PE=1 SV=1	8	7
39S ribosomal protein L38, mitochondrial OS=Mus musculus GN=Mrpl38 PE=1 SV=2	8	7
Uncharacterized protein OS=Mus musculus GN=Tmed9 PE=2 SV=1	8	7
ADP-ribosylation factor GTPase-activating protein 3 OS=Mus musculus GN=Arfgap3 PE=1 SV=1	8	7
Latent-transforming growth factor beta-binding protein 3 OS=Mus musculus GN=Ltbp3 PE=1 SV=1	8	7
FAS-associated factor 2 OS=Mus musculus GN=Faf2 PE=1 SV=2	8	7
28S ribosomal protein S22, mitochondrial OS=Mus musculus GN=Mrps22 PE=1 SV=1	8	7
Enoyl-CoA delta isomerase 2, mitochondrial OS=Mus musculus GN=Eci2 PE=1 SV=2	8	7
Galectin-3 OS=Mus musculus GN=Lgals3 PE=1 SV=3	8	8
Plasminogen activator inhibitor 1 RNA-binding protein OS=Mus musculus GN=Serbp1 PE=1 SV=2	8	8
Polyribonucleotide nucleotidyltransferase 1, mitochondrial OS=Mus musculus GN=Pnpt1 PE=1 SV=1	8	8
Long-chain fatty acid transport protein 4 OS=Mus musculus GN=Slc27a4 PE=1 SV=1	8	8
Elongation factor 1-delta OS=Mus musculus GN=Eef1d PE=1 SV=1	8	8
UDP-glucuronosyltransferase 1-7C OS=Mus musculus GN=Ugt1a7c PE=1 SV=1	8	8
Carboxypeptidase OS=Mus musculus GN=Ctsa PE=1 SV=1	8	8
Uncharacterized protein OS=Mus musculus GN=Rasa3 PE=2 SV=1	8	8
Granulins OS=Mus musculus GN=Grn PE=1 SV=2	8	8
Dolichyl-diphosphooligosaccharide--protein glycosyltransferase subunit STT3B OS=Mus musculus GN=Stt3b PE=1 SV=1	8	8
Chloride intracellular channel protein 1 OS=Mus musculus GN=Clic1 PE=1 SV=3	8	8
RAB18, member RAS oncogene family, isoform CRA_a OS=Mus musculus GN=Rab18 PE=1 SV=1	8	9
Cathepsin L1 OS=Mus musculus GN=Ctsl PE=1 SV=2	8	9
Persulfide dioxygenase ETHE1, mitochondrial OS=Mus musculus GN=Ethe1 PE=1 SV=2	8	9
Milk fat globule-EGF factor 8 protein, isoform CRA_a OS=Mus musculus GN=Mfge8 PE=2 SV=1	8	9
Uncharacterized protein OS=Mus musculus GN=Hnrnpa1 PE=2 SV=1	8	9
CCA tRNA nucleotidyltransferase 1, mitochondrial OS=Mus musculus GN=Trnt1 PE=1 SV=1	8	9
Dynactin subunit 2 OS=Mus musculus GN=Dctn2 PE=1 SV=3	8	9
Asparagine--tRNA ligase, cytoplasmic OS=Mus musculus GN=Nars PE=1 SV=2	8	9
Acetolactate synthase-like protein OS=Mus musculus GN=Ilvbl PE=1 SV=1	8	9
Keratin, type II cytoskeletal 5 OS=Mus musculus GN=Krt5 PE=1 SV=1	8	10
L-lactate dehydrogenase OS=Mus musculus GN=Ldha PE=1 SV=1	8	10
Catenin beta-1 OS=Mus musculus GN=Ctnnb1 PE=1 SV=1	8	10
Adipocyte enhancer-binding protein 1 OS=Mus musculus GN=Aebp1 PE=1 SV=1	8	10
Insulin-like growth factor 2 mRNA-binding protein 2 OS=Mus musculus GN=Igf2bp2 PE=1 SV=1	8	10
Manganese-transporting ATPase 13A1 OS=Mus musculus GN=Atp13a1 PE=1 SV=2	8	10
Prostaglandin E synthase 2 OS=Mus musculus GN=Ptges2 PE=1 SV=3	8	10
Paralemmin A kinase anchor protein (Fragment) OS=Mus musculus GN=Pakap PE=1 SV=1	8	11
Mitogen-activated protein kinase 1 OS=Mus musculus GN=Mapk1 PE=1 SV=3	8	11
Uncharacterized protein OS=Mus musculus GN=Sh3kbp1 PE=2 SV=1	8	11
Syntrophin, basic 2 OS=Mus musculus GN=Sntb2 PE=1 SV=1	8	11
Serine/threonine-protein phosphatase 2A 65 kDa regulatory subunit A alpha isoform OS=Mus musculus GN=Ppp2r1a PE=1 SV=3	8	11
Uncharacterized protein OS=Mus musculus GN=Uba1 PE=2 SV=1	8	11
Actin-related protein 2/3 complex subunit 1B OS=Mus musculus GN=Arpc1b PE=1 SV=4	8	12
T-complex protein 1 subunit alpha OS=Mus musculus GN=Tcp1 PE=1 SV=3	8	12
Peripheral plasma membrane protein CASK (Fragment) OS=Mus musculus GN=Cask PE=1 SV=1	8	12
ATP-binding cassette, sub-family B (MDR/TAP), member 1B OS=Mus musculus GN=Abcb1b PE=1 SV=1	8	12
Eukaryotic translation initiation factor 3 subunit C OS=Mus musculus GN=Eif3c PE=1 SV=1	8	12
Dihydropyrimidinase-related protein 2 OS=Mus musculus GN=Dpysl2 PE=1 SV=2	8	12
Laminin subunit beta-2 OS=Mus musculus GN=Lamb2 PE=1 SV=2	7
NADH dehydrogenase [ubiquinone] 1 beta subcomplex subunit 9 OS=Mus musculus GN=Ndufb9 PE=1 SV=3	7	3
Complement component 4B (Childo blood group) OS=Mus musculus GN=C4b PE=2 SV=1	7	4
Uncharacterized protein (Fragment) OS=Mus musculus GN=Sardh PE=2 SV=1	7	4
NADH dehydrogenase [ubiquinone] iron-sulfur protein 3, mitochondrial OS=Mus musculus GN=Ndufs3 PE=1 SV=2	7	4
Carbonyl reductase family member 4 OS=Mus musculus GN=Cbr4 PE=1 SV=2	7	4
Mitochondrial ribosomal protein L9 OS=Mus musculus GN=Mrpl9 PE=1 SV=1	7	4
Galectin OS=Mus musculus GN=Lgals9 PE=1 SV=1	7	4
Glutaryl-CoA dehydrogenase, mitochondrial OS=Mus musculus GN=Gcdh PE=1 SV=1	7	4
Carnitine O-acetyltransferase OS=Mus musculus GN=Crat PE=1 SV=3	7	4
MCG13441 OS=Mus musculus GN=Rps27a PE=2 SV=1	7	5
60S ribosomal protein L13 OS=Mus musculus GN=Rpl13 PE=1 SV=3	7	5
Predicted gene 10036 OS=Mus musculus GN=Gm10036 PE=3 SV=1	7	5
Testis expressed gene 264 OS=Mus musculus GN=Tex264 PE=2 SV=1	7	5
Polyadenylate-binding protein OS=Mus musculus GN=Pabpc4 PE=1 SV=1	7	5
Hydroxysteroid dehydrogenase-like protein 2 OS=Mus musculus GN=Hsdl2 PE=1 SV=1	7	5
Mitochondrial import inner membrane translocase subunit TIM50 OS=Mus musculus GN=Timm50 PE=1 SV=1	7	5
28S ribosomal protein S35, mitochondrial OS=Mus musculus GN=Mrps35 PE=1 SV=1	7	5
40S ribosomal protein S12 OS=Mus musculus GN=Rps12 PE=1 SV=1	7	5
Valacyclovir hydrolase OS=Mus musculus GN=Bphl PE=1 SV=1	7	5
Lipase maturation factor 2 OS=Mus musculus GN=Lmf2 PE=1 SV=1	7	5
Rho-related GTP-binding protein RhoC OS=Mus musculus GN=Rhoc PE=1 SV=2	7	5
N-acetylated alpha-linked acidic dipeptidase 2, isoform CRA_a OS=Mus musculus GN=Naalad2 PE=1 SV=1	7	5
Long-chain-fatty-acid--CoA ligase 5 OS=Mus musculus GN=Acsl5 PE=1 SV=1	7	5
Golgi-specific brefeldin A-resistance factor 1 (Fragment) OS=Mus musculus GN=Gbf1 PE=1 SV=1	7	5
Ribosome-recycling factor, mitochondrial OS=Mus musculus GN=Mrrf PE=1 SV=1	7	5
Rab23 OS=Mus musculus GN=Rab23 PE=2 SV=1	7	5
Uncharacterized protein OS=Mus musculus GN=Rpl14 PE=2 SV=1	7	6
60S acidic ribosomal protein P2 OS=Mus musculus GN=Rplp2 PE=1 SV=3	7	6
Dephospho-CoA kinase domain-containing protein OS=Mus musculus GN=Dcakd PE=1 SV=1	7	6
Ribosomal protein S15A OS=Mus musculus GN=Rps15a PE=1 SV=1	7	6
Protein kinase C and casein kinase II substrate protein 3 OS=Mus musculus GN=Pacsin3 PE=1 SV=1	7	6
Heterogeneous nuclear ribonucleoprotein H OS=Mus musculus GN=Hnrnph1 PE=1 SV=3	7	6
Uncharacterized protein OS=Mus musculus GN=Lrpap1 PE=2 SV=1	7	6
RAB6, member RAS oncogene family, isoform CRA_a OS=Mus musculus GN=Rab6a PE=2 SV=1	7	6
Cold shock domain-containing protein E1 OS=Mus musculus GN=Csde1 PE=1 SV=1	7	6
Trimethyllysine dioxygenase, mitochondrial OS=Mus musculus GN=Tmlhe PE=1 SV=2	7	6
Cytochrome P450 20A1 OS=Mus musculus GN=Cyp20a1 PE=1 SV=1	7	6
Delta(24)-sterol reductase OS=Mus musculus GN=Dhcr24 PE=1 SV=1	7	6
Eukaryotic translation initiation factor 3 subunit I OS=Mus musculus GN=Eif3i PE=1 SV=1	7	6
Flotillin-2 OS=Mus musculus GN=Flot2 PE=1 SV=2	7	6
Microtubule-associated protein RP/EB family member 1 OS=Mus musculus GN=Mapre1 PE=1 SV=3	7	6
Calpastatin OS=Mus musculus GN=Cast PE=1 SV=2	7	6
28S ribosomal protein S23, mitochondrial OS=Mus musculus GN=Mrps23 PE=1 SV=1	7	6
Delta-6 desaturase (Fragment) OS=Mus musculus GN=Fads2 PE=2 SV=1	7	6
Cytochrome c1, heme protein, mitochondrial OS=Mus musculus GN=Cyc1 PE=1 SV=1	7	7
Endoplasmic reticulum resident protein 29 OS=Mus musculus GN=Erp29 PE=1 SV=2	7	7
Superoxide dismutase OS=Mus musculus GN=Sod2 PE=1 SV=1	7	7
Ribosomal protein L19 OS=Mus musculus GN=Rpl19 PE=1 SV=1	7	7
Vesicle-associated membrane protein, associated protein B and C OS=Mus musculus GN=Vapb PE=1 SV=1	7	7
CDGSH iron-sulfur domain-containing protein 1 OS=Mus musculus GN=Cisd1 PE=1 SV=1	7	7
Ras GTPase-activating protein-binding protein 1 OS=Mus musculus GN=G3bp1 PE=1 SV=1	7	7
Adenylate kinase 4, mitochondrial OS=Mus musculus GN=Ak4 PE=1 SV=1	7	7
RAB5C, member RAS oncogene family, isoform CRA_a OS=Mus musculus GN=Rab5c PE=1 SV=1	7	7
Coiled-coil domain-containing protein 58 OS=Mus musculus GN=Ccdc58 PE=1 SV=1	7	7
40S ribosomal protein S5 (Fragment) OS=Mus musculus GN=Rps5 PE=1 SV=1	7	7
Probable ATP-dependent RNA helicase DDX6 OS=Mus musculus GN=Ddx6 PE=1 SV=1	7	7
Eukaryotic peptide chain release factor subunit 1 OS=Mus musculus GN=Etf1 PE=1 SV=4	7	7
Uncharacterized protein OS=Mus musculus GN=Rps10 PE=2 SV=1	7	7
Tyrosine-protein phosphatase non-receptor type 1 OS=Mus musculus GN=Ptpn1 PE=1 SV=2	7	7
ATP-binding cassette sub-family F member 1 OS=Mus musculus GN=Abcf1 PE=1 SV=1	7	7
Malate dehydrogenase, cytoplasmic OS=Mus musculus GN=Mdh1 PE=1 SV=3	7	7
MCG116026, isoform CRA_a OS=Mus musculus GN=Rab9 PE=1 SV=1	7	7
Mrpl13 protein (Fragment) OS=Mus musculus GN=Mrpl13 PE=2 SV=1	7	7
Sec24 related gene family, member C (S. cerevisiae) OS=Mus musculus GN=Sec24c PE=1 SV=1	7	7
Uncharacterized protein (Fragment) OS=Mus musculus GN=Sumf2 PE=2 SV=1	7	7
Protein RCC2 OS=Mus musculus GN=Rcc2 PE=1 SV=1	7	7
GDH/6PGL endoplasmic bifunctional protein OS=Mus musculus GN=H6pd PE=1 SV=1	7	7
ATP-binding cassette sub-family F member 2 OS=Mus musculus GN=Abcf2 PE=1 SV=1	7	7
Alcohol dehydrogenase [NADP(+)] OS=Mus musculus GN=Akr1a1 PE=1 SV=3	7	7
Carboxylic ester hydrolase OS=Mus musculus GN=Ces2g PE=1 SV=1	7	7
Golgi-associated plant pathogenesis-related protein 1 OS=Mus musculus GN=Glipr2 PE=1 SV=3	7	7
Perilipin-3 OS=Mus musculus GN=Plin3 PE=1 SV=1	7	7
ATP-dependent Clp protease ATP-binding subunit clpX-like, mitochondrial OS=Mus musculus GN=Clpx PE=1 SV=2	7	7
Pigment epithelium-derived factor OS=Mus musculus GN=Serpinf1 PE=1 SV=2	7	7
Protein scribble homolog OS=Mus musculus GN=Scrib PE=1 SV=2	7	7
Plexin-A1 OS=Mus musculus GN=Plxna1 PE=1 SV=1	7	7
60S ribosomal protein L23 OS=Mus musculus GN=Rpl23 PE=1 SV=1	7	8
Ribosomal protein S14 OS=Mus musculus GN=rps14 PE=3 SV=1	7	8
Eukaryotic translation initiation factor 5A (Fragment) OS=Mus musculus GN=Eif5a PE=1 SV=1	7	8
Uncharacterized protein OS=Mus musculus GN=Capg PE=2 SV=1	7	8
Cofilin-1 OS=Mus musculus GN=Cfl1 PE=1 SV=3	7	8
14-3-3 protein zeta/delta OS=Mus musculus GN=Ywhaz PE=1 SV=1	7	8
Cytochrome P450, family 2, subfamily d, polypeptide 22 OS=Mus musculus GN=Cyp2d22 PE=2 SV=1	7	8
Proteasome subunit alpha type-6 OS=Mus musculus GN=Psma6 PE=1 SV=1	7	8
Zinc finger CCCH-type antiviral protein 1 OS=Mus musculus GN=Zc3hav1 PE=1 SV=1	7	8
Profilin-1 OS=Mus musculus GN=Pfn1 PE=1 SV=2	7	8
Peroxiredoxin-5, mitochondrial OS=Mus musculus GN=Prdx5 PE=1 SV=2	7	8
KN motif and ankyrin repeat domain-containing protein 2 OS=Mus musculus GN=Kank2 PE=1 SV=1	7	8
Uncharacterized protein OS=Mus musculus GN=Sars PE=2 SV=1	7	8
Solute carrier family 25 member 40 OS=Mus musculus GN=Slc25a40 PE=1 SV=1	7	8
Calponin-2 OS=Mus musculus GN=Cnn2 PE=1 SV=1	7	8
Platelet-derived growth factor receptor alpha OS=Mus musculus GN=Pdgfra PE=1 SV=3	7	8
60S ribosomal protein L26 (Fragment) OS=Mus musculus GN=Rpl26 PE=1 SV=1	7	9
Actin-related protein 2/3 complex subunit 2 OS=Mus musculus GN=Arpc2 PE=1 SV=3	7	9
Carnitine O-palmitoyltransferase 1, liver isoform OS=Mus musculus GN=Cpt1a PE=1 SV=4	7	9
Insulin-like growth factor 2 mRNA-binding protein 1 OS=Mus musculus GN=Igf2bp1 PE=1 SV=1	7	9
Transaldolase OS=Mus musculus GN=Taldo1 PE=1 SV=1	7	9
Striatin OS=Mus musculus GN=Strn PE=1 SV=2	7	9
S-formylglutathione hydrolase OS=Mus musculus GN=Esd PE=1 SV=1	7	9
Cytoplasmic FMR1-interacting protein 1 OS=Mus musculus GN=Cyfip1 PE=1 SV=1	7	9
Golgin subfamily A member 3 OS=Mus musculus GN=Golga3 PE=1 SV=3	7	9
Isoleucine--tRNA ligase, cytoplasmic OS=Mus musculus GN=Iars PE=1 SV=2	7	9
Glucose-6-phosphate 1-dehydrogenase X OS=Mus musculus GN=G6pdx PE=1 SV=3	7	10
Cartilage-associated protein OS=Mus musculus GN=Crtap PE=1 SV=3	7	10
Matrix metalloproteinase-14 OS=Mus musculus GN=Mmp14 PE=2 SV=3	7	10
DnaJ heat shock protein family (Hsp40) member C13 OS=Mus musculus GN=Dnajc13 PE=1 SV=1	7	10
MKIAA4137 protein (Fragment) OS=Mus musculus GN=Sel1l PE=2 SV=1	7	10
GTP:AMP phosphotransferase AK3, mitochondrial OS=Mus musculus GN=Ak3 PE=1 SV=3	7	11
Mitochondrial dicarboxylate carrier OS=Mus musculus GN=Slc25a10 PE=1 SV=2	7	11
Capping protein (Actin filament) muscle Z-line, beta, isoform CRA_a OS=Mus musculus GN=Capzb PE=1 SV=1	7	11
CAD protein OS=Mus musculus GN=Cad PE=1 SV=1	7	13
Importin-5 OS=Mus musculus GN=Ipo5 PE=1 SV=3	7	13
MKIAA1352 protein (Fragment) OS=Mus musculus GN=Lars PE=2 SV=1	7	14
Os9 protein (Fragment) OS=Mus musculus GN=Os9 PE=2 SV=1	6
Methionine-tRNA synthetase 2 (Mitochondrial) OS=Mus musculus GN=Mars2 PE=1 SV=1	6
MCG126194, isoform CRA_a OS=Mus musculus GN=Rpl31 PE=1 SV=1	6	2
Lclat1 protein OS=Mus musculus GN=Lclat1 PE=1 SV=1	6	2
2310014H01Rik protein OS=Mus musculus GN=Ppp1r18 PE=2 SV=1	6	2
Tapasin OS=Mus musculus GN=Tapbp PE=1 SV=1	6	2
Cytospin-B OS=Mus musculus GN=Specc1 PE=1 SV=1	6	2
Lysophospholipase D GDPD1 OS=Mus musculus GN=Gdpd1 PE=1 SV=1	6	2
Collagen, type IV, alpha 2 OS=Mus musculus GN=Col4a2 PE=1 SV=1	6	3
39S ribosomal protein L16, mitochondrial OS=Mus musculus GN=Mrpl16 PE=1 SV=1	6	3
Putative sodium-coupled neutral amino acid transporter 10 OS=Mus musculus GN=Slc38a10 PE=1 SV=1	6	3
Elongation factor Ts, mitochondrial OS=Mus musculus GN=Tsfm PE=2 SV=1	6	4
Pyrroline-5-carboxylate reductase 1, mitochondrial OS=Mus musculus GN=Pycr1 PE=1 SV=1	6	4
Endoplasmic reticulum-Golgi intermediate compartment protein 1 OS=Mus musculus GN=Ergic1 PE=1 SV=1	6	4
Cytochrome c oxidase assembly factor 7 OS=Mus musculus GN=Coa7 PE=1 SV=1	6	4
Glutathione peroxidase 7 OS=Mus musculus GN=Gpx7 PE=1 SV=1	6	4
Glycine--tRNA ligase OS=Mus musculus GN=Gars PE=1 SV=1	6	4
Heterogeneous nuclear ribonucleoprotein A3 OS=Mus musculus GN=Hnrnpa3 PE=1 SV=1	6	4
Sperm-specific antigen 2 homolog OS=Mus musculus GN=Ssfa2 PE=1 SV=1	6	4
Ataxin-10 OS=Mus musculus GN=Atxn10 PE=1 SV=2	6	4
Interferon-inducible double-stranded RNA-dependent protein kinase activator A OS=Mus musculus GN=Prkra PE=1 SV=1	6	4
Dehydrogenase/reductase SDR family member 1 OS=Mus musculus GN=Dhrs1 PE=1 SV=1	6	4
Septin-10 OS=Mus musculus GN=Sept10 PE=1 SV=1	6	4
Uncharacterized protein OS=Mus musculus GN=Amfr PE=2 SV=1	6	4
Tyrosine-protein kinase OS=Mus musculus GN=Src PE=1 SV=1	6	4
Uncharacterized protein OS=Mus musculus GN=Umps PE=2 SV=1	6	4
Uncharacterized protein OS=Mus musculus GN=Tpp1 PE=2 SV=1	6	4
NSR1 OS=Mus musculus GN=Scarf2 PE=1 SV=1	6	4
MAP7 domain-containing protein 1 OS=Mus musculus GN=Map7d1 PE=1 SV=1	6	4
26S proteasome non-ATPase regulatory subunit 3 OS=Mus musculus GN=Psmd3 PE=1 SV=3	6	4
60S ribosomal protein L21 OS=Mus musculus GN=Rpl21 PE=1 SV=1	6	5
MCG1036414 OS=Mus musculus GN=Rpl35a PE=1 SV=1	6	5
Guanine nucleotide-binding protein G(I)/G(S)/G(T) subunit beta-2 OS=Mus musculus GN=Gnb2 PE=1 SV=1	6	5
Dolichol-phosphate mannosyltransferase subunit 1 OS=Mus musculus GN=Dpm1 PE=1 SV=1	6	5
Stromal cell-derived factor 2-like protein 1 OS=Mus musculus GN=Sdf2l1 PE=1 SV=2	6	5
39S ribosomal protein L24, mitochondrial OS=Mus musculus GN=Mrpl24 PE=1 SV=1	6	5
Aminoacyl tRNA synthase complex-interacting multifunctional protein 1 OS=Mus musculus GN=Aimp1 PE=1 SV=2	6	5
Mitochondrial amidoxime reducing component 2 OS=Mus musculus GN=Marc2 PE=1 SV=1	6	5
FAST kinase domain-containing protein 4 OS=Mus musculus GN=Tbrg4 PE=1 SV=1	6	5
ATP-binding cassette sub-family B member 10, mitochondrial OS=Mus musculus GN=Abcb10 PE=1 SV=1	6	5
Farnesyl pyrophosphate synthase OS=Mus musculus GN=Fdps PE=1 SV=1	6	5
[Pyruvate dehydrogenase (acetyl-transferring)] kinase isozyme 1, mitochondrial OS=Mus musculus GN=Pdk1 PE=1 SV=2	6	5
Sec1 family domain-containing protein 1 OS=Mus musculus GN=Scfd1 PE=1 SV=1	6	5
Heterogeneous nuclear ribonucleoprotein D0 OS=Mus musculus GN=Hnrnpd PE=1 SV=2	6	5
Uncharacterized protein OS=Mus musculus GN=Atp6v1b2 PE=2 SV=1	6	5
Large subunit GTPase 1 homolog OS=Mus musculus GN=Lsg1 PE=1 SV=2	6	5
Caprin-1 OS=Mus musculus GN=Caprin1 PE=1 SV=2	6	5
Tubulin beta chain OS=Mus musculus GN=Tubb6 PE=1 SV=1	6	5
Rho-associated protein kinase 2 OS=Mus musculus GN=Rock2 PE=1 SV=1	6	5
Coronin OS=Mus musculus GN=Coro1b PE=1 SV=1	6	5
cAMP-dependent protein kinase type II-beta regulatory subunit OS=Mus musculus GN=Prkar2b PE=1 SV=1	6	5
NADH dehydrogenase [ubiquinone] 1 alpha subcomplex subunit 10, mitochondrial OS=Mus musculus GN=Ndufa10 PE=1 SV=1	6	5
Retinol dehydrogenase 11 OS=Mus musculus GN=Rdh11 PE=1 SV=1	6	5
Probable Xaa-Pro aminopeptidase 3 OS=Mus musculus GN=Xpnpep3 PE=1 SV=1	6	5
Calponin OS=Mus musculus GN=Cnn3 PE=1 SV=1	6	5
Lamina-associated polypeptide 2, isoforms beta/delta/epsilon/gamma OS=Mus musculus GN=Tmpo PE=1 SV=4	6	5
V-type proton ATPase subunit H OS=Mus musculus GN=Atp6v1h PE=1 SV=1	6	5
Uncharacterized protein OS=Mus musculus GN=Rpl12 PE=2 SV=1	6	6
Keratin, type I cytoskeletal 16 OS=Mus musculus GN=Krt16 PE=1 SV=3	6	6
Brain acid soluble protein 1 OS=Mus musculus GN=Basp1 PE=1 SV=3	6	6
Tricarboxylate transport protein, mitochondrial OS=Mus musculus GN=Slc25a1 PE=1 SV=1	6	6
DnaJ homolog subfamily B member 11 OS=Mus musculus GN=Dnajb11 PE=1 SV=1	6	6
Peptidylprolyl isomerase OS=Mus musculus GN=Fkbp8 PE=2 SV=1	6	6
Cytochrome b-c1 complex subunit 7 OS=Mus musculus GN=Uqcrb PE=1 SV=1	6	6
RNA-binding protein FUS OS=Mus musculus GN=Fus PE=1 SV=1	6	6
Sulfurtransferase OS=Mus musculus GN=Mpst PE=1 SV=1	6	6
Nucleophosmin OS=Mus musculus GN=Npm1 PE=1 SV=1	6	6
40S ribosomal protein S6 OS=Mus musculus GN=Rps6 PE=1 SV=1	6	6
NADH dehydrogenase [ubiquinone] 1 beta subcomplex subunit 10 OS=Mus musculus GN=Ndufb10 PE=1 SV=3	6	6
Chaperonin containing Tcp1, subunit 6a (Zeta) OS=Mus musculus GN=Cct6a PE=2 SV=1	6	6
RAS related protein 1b OS=Mus musculus GN=Rap1b PE=1 SV=1	6	6
H2-K region expressed gene 6, isoform CRA_a OS=Mus musculus GN=H2-Ke6 PE=2 SV=1	6	6
Dynein cytoplasmic 1 intermediate chain 2 OS=Mus musculus GN=Dync1i2 PE=1 SV=1	6	6
ATP-binding cassette sub-family B member 7, mitochondrial OS=Mus musculus GN=Abcb7 PE=1 SV=3	6	6
ATP-binding cassette sub-family B member 8, mitochondrial OS=Mus musculus GN=Abcb8 PE=1 SV=1	6	6
Flotillin-1 OS=Mus musculus GN=Flot1 PE=1 SV=1	6	6
Harvey rat sarcoma oncogene, subgroup R OS=Mus musculus GN=Rras PE=1 SV=1	6	6
Ras homolog gene family, member G OS=Mus musculus GN=Rhog PE=1 SV=1	6	6
Thioredoxin-related transmembrane protein 1 OS=Mus musculus GN=Tmx1 PE=1 SV=1	6	6
Rab3 GTPase-activating protein catalytic subunit OS=Mus musculus GN=Rab3gap1 PE=1 SV=1	6	6
26S proteasome regulatory subunit 6A OS=Mus musculus GN=Psmc3 PE=1 SV=1	6	6
Dehydrogenase/reductase SDR family member 4 OS=Mus musculus GN=Dhrs4 PE=1 SV=3	6	6
Dipeptidyl peptidase 2 OS=Mus musculus GN=Dpp7 PE=1 SV=2	6	6
N-acetylglucosamine-6-sulfatase OS=Mus musculus GN=Gns PE=1 SV=1	6	6
Tight junction protein ZO-2 OS=Mus musculus GN=Tjp2 PE=1 SV=2	6	6
Fragile X mental retardation syndrome-related protein 1 OS=Mus musculus GN=Fxr1 PE=1 SV=1	6	6
Alpha-aminoadipic semialdehyde dehydrogenase OS=Mus musculus GN=Aldh7a1 PE=1 SV=4	6	6
Tyrosine-protein phosphatase non-receptor type 23 OS=Mus musculus GN=Ptpn23 PE=1 SV=2	6	6
Vesicle transport protein SEC20 OS=Mus musculus GN=Bnip1 PE=1 SV=1	6	6
Protein ABHD16A OS=Mus musculus GN=Abhd16a PE=1 SV=3	6	6
3-keto-steroid reductase OS=Mus musculus GN=Hsd17b7 PE=1 SV=1	6	6
Sideroflexin-1 OS=Mus musculus GN=Sfxn1 PE=1 SV=3	6	6
Sphingomyelin phosphodiesterase 2 OS=Mus musculus GN=Smpd2 PE=1 SV=1	6	6
Disabled homolog 2 OS=Mus musculus GN=Dab2 PE=1 SV=1	6	6
Histone H4 OS=Mus musculus GN=Hist2h4 PE=1 SV=1	6	7
Zinc metallopeptidase, STE24 homolog (S. cerevisiae) OS=Mus musculus GN=Zmpste24 PE=1 SV=1	6	7
Galectin-1 OS=Mus musculus GN=Lgals1 PE=1 SV=3	6	7
Cathepsin D OS=Mus musculus GN=Ctsd PE=1 SV=1	6	7
Ribosomal protein L15 OS=Mus musculus GN=Gm10020 PE=3 SV=1	6	7
Calcium/calmodulin-dependent protein kinase type II subunit delta OS=Mus musculus GN=Camk2d PE=1 SV=1	6	7
NADH dehydrogenase [ubiquinone] iron-sulfur protein 2, mitochondrial OS=Mus musculus GN=Ndufs2 PE=1 SV=1	6	7
Psap protein OS=Mus musculus GN=Psap PE=2 SV=1	6	7
Protein THEM6 OS=Mus musculus GN=Them6 PE=1 SV=1	6	7
ADP-ribosylation factor-like protein 8B OS=Mus musculus GN=Arl8b PE=1 SV=1	6	7
Myosin light polypeptide 6 OS=Mus musculus GN=Myl6 PE=1 SV=1	6	7
GDP-fucose protein O-fucosyltransferase 1 OS=Mus musculus GN=Pofut1 PE=1 SV=1	6	7
Alpha-1,3/1,6-mannosyltransferase ALG2 OS=Mus musculus GN=Alg2 PE=1 SV=2	6	7
Aminopeptidase (Fragment) OS=Mus musculus GN=Npepps PE=1 SV=1	6	7
Lipoma-preferred partner homolog OS=Mus musculus GN=Lpp PE=1 SV=1	6	7
Protein kinase C and casein kinase substrate in neurons protein 2 OS=Mus musculus GN=Pacsin2 PE=1 SV=1	6	7
Protein O-glucosyltransferase 1 OS=Mus musculus GN=Poglut1 PE=1 SV=2	6	7
28S ribosomal protein S7, mitochondrial OS=Mus musculus GN=Mrps7 PE=1 SV=1	6	7
Phenylalanine--tRNA ligase alpha subunit OS=Mus musculus GN=Farsa PE=1 SV=1	6	7
ATP-binding cassette sub-family E member 1 OS=Mus musculus GN=Abce1 PE=1 SV=1	6	7
Platelet-activating factor acetylhydrolase IB subunit alpha OS=Mus musculus GN=Pafah1b1 PE=1 SV=2	6	7
Probable histidine--tRNA ligase, mitochondrial OS=Mus musculus GN=Hars2 PE=1 SV=1	6	7
D-glutamate cyclase, mitochondrial OS=Mus musculus GN=Dglucy PE=1 SV=1	6	7
KDEL motif-containing protein 1 OS=Mus musculus GN=Kdelc1 PE=1 SV=1	6	7
GPI transamidase component PIG-S OS=Mus musculus GN=Pigs PE=1 SV=3	6	7
Y box protein 1 OS=Mus musculus GN=Ybx1 PE=1 SV=1	6	8
Asparagine synthetase [glutamine-hydrolyzing] OS=Mus musculus GN=Asns PE=1 SV=3	6	8
OCIA domain-containing protein 1 OS=Mus musculus GN=Ociad1 PE=1 SV=1	6	8
Serine/threonine-protein kinase DCLK1 OS=Mus musculus GN=Dclk1 PE=1 SV=1	6	8
Coatomer subunit gamma-1 OS=Mus musculus GN=Copg1 PE=1 SV=1	6	8
Supervillin OS=Mus musculus GN=Svil PE=1 SV=1	6	8
Epidermal growth factor receptor kinase substrate 8 OS=Mus musculus GN=Eps8 PE=1 SV=2	6	8
Uncharacterized protein (Fragment) OS=Mus musculus GN=Farsb PE=2 SV=1	6	8
Disintegrin and metalloproteinase domain-containing protein 10 OS=Mus musculus GN=Adam10 PE=1 SV=2	6	8
Acetoacetyl-CoA synthetase OS=Mus musculus GN=Aacs PE=1 SV=1	6	8
Exportin-2 OS=Mus musculus GN=Cse1l PE=1 SV=1	6	8
40S ribosomal protein S8 OS=Mus musculus GN=Rps8 PE=1 SV=1	6	9
Guanine nucleotide-binding protein G(s) subunit alpha isoforms XLas OS=Mus musculus GN=Gnas PE=1 SV=1	6	9
Eukaryotic translation initiation factor 2A OS=Mus musculus GN=Eif2a PE=1 SV=2	6	9
Erbb2 interacting protein OS=Mus musculus GN=Erbin PE=2 SV=1	6	9
CLIP-associating protein 1 OS=Mus musculus GN=Clasp1 PE=1 SV=2	6	9
Integrin-linked protein kinase OS=Mus musculus GN=Ilk PE=1 SV=2	6	9
CDC42 binding protein kinase beta OS=Mus musculus GN=Cdc42bpb PE=2 SV=1	6	9
Uncharacterized protein OS=Mus musculus GN=Tars PE=2 SV=1	6	9
26S proteasome regulatory subunit 7 OS=Mus musculus GN=Psmc2 PE=1 SV=5	6	9
Coatomer subunit delta OS=Mus musculus GN=Arcn1 PE=1 SV=2	6	10
Phosphoserine aminotransferase OS=Mus musculus GN=Psat1 PE=2 SV=1	6	10
Microtubule-associated protein 1B OS=Mus musculus GN=Map1b PE=2 SV=1	6	10
Eukaryotic translation initiation factor 2 subunit 2 OS=Mus musculus GN=Eif2s2 PE=1 SV=1	6	12
28S ribosomal protein S31, mitochondrial OS=Mus musculus GN=Mrps31 PE=1 SV=1	5	2
Dual specificity mitogen-activated protein kinase kinase 1 OS=Mus musculus GN=Map2k1 PE=1 SV=2	5	2
Glutamyl-tRNA(Gln) amidotransferase subunit A, mitochondrial OS=Mus musculus GN=Qrsl1 PE=1 SV=1	5	2
Torsin-1A-interacting protein 2 OS=Mus musculus GN=Tor1aip2 PE=1 SV=1	5	2
Uncharacterized protein (Fragment) OS=Mus musculus GN=Mrpl44 PE=2 SV=1	5	2
Transmembrane 9 superfamily member (Fragment) OS=Mus musculus GN=Tm9sf1 PE=1 SV=1	5	2
Wolfram syndrome 1 homolog (Human) OS=Mus musculus GN=Wfs1 PE=1 SV=1	5	2
Protein odr-4 homolog OS=Mus musculus GN=Odr4 PE=1 SV=2	5	2
Cytochrome c-type heme lyase OS=Mus musculus GN=Hccs PE=1 SV=2	5	3
39S ribosomal protein L15, mitochondrial OS=Mus musculus GN=Mrpl15 PE=1 SV=1	5	3
ER membrane protein complex subunit 8 OS=Mus musculus GN=Emc8 PE=1 SV=1	5	3
5-methylcytosine rRNA methyltransferase NSUN4 OS=Mus musculus GN=Nsun4 PE=1 SV=1	5	3
39S ribosomal protein L45, mitochondrial OS=Mus musculus GN=Mrpl45 PE=1 SV=1	5	3
Serine palmitoyltransferase, long chain base subunit 2, isoform CRA_a OS=Mus musculus GN=Sptlc2 PE=1 SV=1	5	3
Probable arginine--tRNA ligase, mitochondrial OS=Mus musculus GN=Rars2 PE=1 SV=1	5	3
Acyl-CoA-binding domain-containing protein 5 OS=Mus musculus GN=Acbd5 PE=1 SV=1	5	3
Flavin reductase (NADPH) OS=Mus musculus GN=Blvrb PE=1 SV=3	5	3
Lipoyl synthase, mitochondrial OS=Mus musculus GN=Lias PE=1 SV=1	5	3
Mitochondrial intermediate peptidase OS=Mus musculus GN=Mipep PE=1 SV=1	5	3
Cob(I)yrinic acid a,c-diamide adenosyltransferase, mitochondrial OS=Mus musculus GN=Mmab PE=1 SV=1	5	3
Leucine-rich repeat flightless-interacting protein 1 OS=Mus musculus GN=Lrrfip1 PE=1 SV=2	5	3
RIKEN cDNA 1810035L17, isoform CRA_a OS=Mus musculus GN=Slirp PE=2 SV=1	5	4
60S ribosomal protein L27a OS=Mus musculus GN=Rpl27a PE=1 SV=5	5	4
Cytochrome c oxidase subunit 6C OS=Mus musculus GN=Cox6c PE=1 SV=3	5	4
Multifunctional protein ADE2 OS=Mus musculus GN=Paics PE=1 SV=4	5	4
Histone H3.2 OS=Mus musculus GN=Hist2h3c1 PE=1 SV=1	5	4
Drebrin OS=Mus musculus GN=Dbn1 PE=1 SV=1	5	4
Brain-specific angiogenesis inhibitor 1-associated protein 2 OS=Mus musculus GN=Baiap2 PE=1 SV=2	5	4
39S ribosomal protein L22, mitochondrial OS=Mus musculus GN=Mrpl22 PE=1 SV=1	5	4
Synaptosomal-associated protein OS=Mus musculus GN=Snap23 PE=1 SV=1	5	4
26S proteasome non-ATPase regulatory subunit 11 OS=Mus musculus GN=Psmd11 PE=1 SV=3	5	4
39S ribosomal protein L12, mitochondrial OS=Mus musculus GN=Mrpl12 PE=1 SV=2	5	4
Tropomyosin alpha-1 chain OS=Mus musculus GN=Tpm1 PE=1 SV=1	5	4
Annexin A4 OS=Mus musculus GN=Anxa4 PE=1 SV=4	5	4
Catechol O-methyltransferase OS=Mus musculus GN=Comt PE=1 SV=2	5	4
Endoplasmic reticulum junction formation protein lunapark OS=Mus musculus GN=Lnpk PE=1 SV=1	5	4
Guanine nucleotide-binding protein subunit alpha-13 OS=Mus musculus GN=Gna13 PE=1 SV=1	5	4
Pentatricopeptide repeat domain-containing protein 3, mitochondrial OS=Mus musculus GN=Ptcd3 PE=1 SV=2	5	4
Lysophosphatidic acid phosphatase type 6 OS=Mus musculus GN=Acp6 PE=1 SV=1	5	4
Poly(A) RNA polymerase, mitochondrial OS=Mus musculus GN=Mtpap PE=1 SV=1	5	4
Calpain-2 catalytic subunit OS=Mus musculus GN=Capn2 PE=1 SV=4	5	4
Probable proline--tRNA ligase, mitochondrial OS=Mus musculus GN=Pars2 PE=1 SV=1	5	4
60S ribosomal protein L32 OS=Mus musculus GN=Rpl32 PE=1 SV=2	5	4
Acidic leucine-rich nuclear phosphoprotein 32 family member B OS=Mus musculus GN=Anp32b PE=1 SV=1	5	4
rRNA methyltransferase 3, mitochondrial OS=Mus musculus GN=Mrm3 PE=2 SV=1	5	4
Syntaxin-binding protein 1 OS=Mus musculus GN=Stxbp1 PE=1 SV=2	5	4
Torsin-1B OS=Mus musculus GN=Tor1b PE=1 SV=2	5	4
Transmembrane glycoprotein NMB OS=Mus musculus GN=Gpnmb PE=1 SV=2	5	4
Integrin alpha-6 OS=Mus musculus GN=Itga6 PE=1 SV=3	5	4
Carbonyl reductase [NADPH] 3 OS=Mus musculus GN=Cbr3 PE=1 SV=1	5	4
MKIAA1835 protein (Fragment) OS=Mus musculus GN=Rangap1 PE=2 SV=1	5	4
Wiskott-Aldrich syndrome protein family member 2 OS=Mus musculus GN=Wasf2 PE=1 SV=1	5	4
Glycogen synthase kinase-3 beta OS=Mus musculus GN=Gsk3b PE=1 SV=1	5	4
28S ribosomal protein S34, mitochondrial OS=Mus musculus GN=Mrps34 PE=1 SV=1	5	4
Discoidin domain-containing receptor 2 OS=Mus musculus GN=Ddr2 PE=1 SV=2	5	4
AP-1 complex subunit beta-1 OS=Mus musculus GN=Ap1b1 PE=1 SV=2	5	4
Major vault protein OS=Mus musculus GN=Mvp PE=1 SV=1	5	4
GPI-anchor transamidase OS=Mus musculus GN=Pigk PE=1 SV=2	5	4
SPRY domain-containing protein 4 OS=Mus musculus GN=Spryd4 PE=1 SV=1	5	4
Ecm1 protein OS=Mus musculus GN=Ecm1 PE=2 SV=1	5	4
Cathepsin Z OS=Mus musculus GN=Ctsz PE=1 SV=1	5	4
Threonine--tRNA ligase, mitochondrial OS=Mus musculus GN=Tars2 PE=1 SV=1	5	4
80K protein OS=Mus musculus GN=Marcks PE=2 SV=1	5	4
Complement component 1 Q subcomponent-binding protein, mitochondrial OS=Mus musculus GN=C1qbp PE=1 SV=1	5	5
ATP synthase subunit g, mitochondrial OS=Mus musculus GN=Atp5l PE=1 SV=1	5	5
Keratin, type I cytoskeletal 42 OS=Mus musculus GN=Krt42 PE=1 SV=1	5	5
Krt2 protein OS=Mus musculus GN=Krt2 PE=2 SV=1	5	5
Thioredoxin domain-containing protein 12 OS=Mus musculus GN=Txndc12 PE=1 SV=1	5	5
Aquaporin-1 OS=Mus musculus GN=Aqp1 PE=1 SV=3	5	5
60S ribosomal protein L27 OS=Mus musculus GN=Rpl27 PE=1 SV=1	5	5
28S ribosomal protein S36, mitochondrial OS=Mus musculus GN=Mrps36 PE=1 SV=1	5	5
Cytochrome b-c1 complex subunit 8 OS=Mus musculus GN=Uqcrq PE=1 SV=3	5	5
Stromal cell-derived factor 2 OS=Mus musculus GN=Sdf2 PE=1 SV=1	5	5
Histone H2B (Fragment) OS=Mus musculus GN=Hist1h2bj PE=2 SV=1	5	5
Signal sequence receptor, delta, isoform CRA_b OS=Mus musculus GN=Ssr4 PE=1 SV=1	5	5
Adipocyte plasma membrane-associated protein OS=Mus musculus GN=Apmap PE=1 SV=1	5	5
NAD(P)H-hydrate epimerase OS=Mus musculus GN=Naxe PE=1 SV=1	5	5
Phosphatidylethanolamine-binding protein 1 OS=Mus musculus GN=Pebp1 PE=1 SV=3	5	5
ADP-ribosylation factor 1 OS=Mus musculus GN=Arf1 PE=1 SV=2	5	5
Transmembrane p24-trafficking protein 7 OS=Mus musculus GN=Tmed7 PE=1 SV=1	5	5
Isocitrate dehydrogenase [NADP] cytoplasmic OS=Mus musculus GN=Idh1 PE=1 SV=2	5	5
Phospholipid phosphatase 3 OS=Mus musculus GN=Plpp3 PE=1 SV=1	5	5
Peptidyl-tRNA hydrolase 2, mitochondrial OS=Mus musculus GN=Ptrh2 PE=1 SV=1	5	5
Superoxide dismutase [Cu-Zn] OS=Mus musculus GN=Sod1 PE=1 SV=2	5	5
Vesicle-associated membrane protein 3 OS=Mus musculus GN=Vamp3 PE=1 SV=1	5	5
Protein NipSnap homolog 1 OS=Mus musculus GN=Nipsnap1 PE=1 SV=1	5	5
Polymerase delta-interacting protein 2 OS=Mus musculus GN=Poldip2 PE=1 SV=1	5	5
ADP-dependent glucokinase OS=Mus musculus GN=Adpgk PE=1 SV=1	5	5
Guanine nucleotide-binding protein G(k) subunit alpha OS=Mus musculus GN=Gnai3 PE=1 SV=3	5	5
Proteasome subunit beta type-1 OS=Mus musculus GN=Psmb1 PE=1 SV=1	5	5
Single-stranded DNA binding protein 1 OS=Mus musculus GN=Ssbp1 PE=1 SV=1	5	5
Tubulin beta-4B chain OS=Mus musculus GN=Tubb4b PE=1 SV=1	5	5
RNA-binding protein EWS OS=Mus musculus GN=Ewsr1 PE=1 SV=2	5	5
Amino acid transporter OS=Mus musculus GN=Slc1a5 PE=2 SV=1	5	5
60S ribosomal protein L34 OS=Mus musculus GN=Rpl34 PE=1 SV=2	5	5
Rab11 family-interacting protein 5 OS=Mus musculus GN=Rab11fip5 PE=1 SV=1	5	5
Probable peptidyl-tRNA hydrolase OS=Mus musculus GN=Ptrh1 PE=2 SV=1	5	5
60S ribosomal protein L36 OS=Mus musculus GN=Rpl36 PE=1 SV=1	5	5
Uncharacterized protein OS=Mus musculus GN=Rala PE=2 SV=1	5	5
Prostaglandin reductase-3 OS=Mus musculus GN=Zadh2 PE=1 SV=1	5	5
ADP-ribosylation factor 6 OS=Mus musculus GN=Arf6 PE=1 SV=2	5	5
Sorting nexin 12, isoform CRA_b OS=Mus musculus GN=Snx12 PE=1 SV=1	5	5
Calcium uniporter regulatory subunit MCUb, mitochondrial OS=Mus musculus GN=Mcub PE=1 SV=1	5	5
Ribonuclease inhibitor OS=Mus musculus GN=Rnh1 PE=1 SV=1	5	5
BAG family molecular chaperone regulator 2 OS=Mus musculus GN=Bag2 PE=1 SV=1	5	5
Adenylosuccinate lyase OS=Mus musculus GN=Adsl PE=1 SV=1	5	5
Tropomyosin alpha-4 chain OS=Mus musculus GN=Tpm4 PE=1 SV=3	5	5
Aladin OS=Mus musculus GN=Aaas PE=1 SV=1	5	5
Alpha-methylacyl-CoA racemase OS=Mus musculus GN=Amacr PE=1 SV=4	5	5
Lysosome-associated membrane glycoprotein 2 OS=Mus musculus GN=Lamp2 PE=1 SV=2	5	5
Cytospin-A OS=Mus musculus GN=Specc1l PE=1 SV=1	5	5
Large proline-rich protein BAG6 OS=Mus musculus GN=Bag6 PE=1 SV=1	5	5
Armadillo repeat-containing X-linked protein 3 OS=Mus musculus GN=Armcx3 PE=1 SV=1	5	5
Cysteine and glycine-rich protein 2 OS=Mus musculus GN=Csrp2 PE=1 SV=3	5	5
Cullin-3 OS=Mus musculus GN=Cul3 PE=1 SV=1	5	5
EH domain-containing protein 4 OS=Mus musculus GN=Ehd4 PE=1 SV=1	5	5
Signal transducer and activator of transcription OS=Mus musculus GN=Stat3 PE=2 SV=1	5	5
Casein kinase II subunit alpha OS=Mus musculus GN=Csnk2a1 PE=1 SV=2	5	5
Kinesin-like protein OS=Mus musculus GN=Kif2a PE=1 SV=1	5	5
Polycystin-2 OS=Mus musculus GN=Pkd2 PE=1 SV=2	5	5
ATP-dependent RNA helicase SUPV3L1, mitochondrial OS=Mus musculus GN=Supv3l1 PE=1 SV=1	5	5
AFG3-like protein 1 OS=Mus musculus GN=Afg3l1 PE=1 SV=2	5	5
Uncharacterized protein OS=Mus musculus GN=Mrps6 PE=1 SV=1	5	5
SPARC OS=Mus musculus GN=Sparc PE=1 SV=1	5	6
Histone H1.2 OS=Mus musculus GN=Hist1h1c PE=1 SV=2	5	6
Alpha-centractin OS=Mus musculus GN=Actr1a PE=1 SV=1	5	6
Membrane-associated progesterone receptor component 2 OS=Mus musculus GN=Pgrmc2 PE=1 SV=2	5	6
Uncharacterized protein OS=Mus musculus GN=Sec61a1 PE=2 SV=1	5	6
60S ribosomal protein L35 OS=Mus musculus GN=Rpl35 PE=1 SV=1	5	6
Emerin OS=Mus musculus GN=Emd PE=4 SV=1	5	6
Proteasome subunit alpha type-7 OS=Mus musculus GN=Psma7 PE=1 SV=1	5	6
Proteasome subunit alpha type-1 OS=Mus musculus GN=Psma1 PE=1 SV=1	5	6
NADH dehydrogenase [ubiquinone] 1 alpha subcomplex subunit 9, mitochondrial OS=Mus musculus GN=Ndufa9 PE=1 SV=1	5	6
N-myc downstream regulated gene 1 OS=Mus musculus GN=Ndrg1 PE=2 SV=1	5	6
DnaJ homolog subfamily A member 2 OS=Mus musculus GN=Dnaja2 PE=1 SV=1	5	6
Enoyl-[acyl-carrier-protein] reductase, mitochondrial OS=Mus musculus GN=Mecr PE=1 SV=2	5	6
Cathepsin B OS=Mus musculus GN=Ctsb PE=1 SV=2	5	6
Chloride intracellular channel protein 4 OS=Mus musculus GN=Clic4 PE=1 SV=3	5	6
Citramalyl-CoA lyase, mitochondrial OS=Mus musculus GN=Clybl PE=1 SV=2	5	6
Guanine nucleotide-binding protein G(o) subunit alpha OS=Mus musculus GN=Gnao1 PE=1 SV=3	5	6
Kin of IRRE-like protein 1 OS=Mus musculus GN=Kirrel1 PE=1 SV=1	5	6
Leucyl-cystinyl aminopeptidase OS=Mus musculus GN=Lnpep PE=1 SV=1	5	6
Integrin beta-3 OS=Mus musculus GN=Itgb3 PE=1 SV=2	5	6
Uncharacterized protein OS=Mus musculus GN=Rcn2 PE=2 SV=1	5	6
Slk protein OS=Mus musculus GN=Slk PE=2 SV=1	5	6
Melanoma inhibitory activity protein 2 OS=Mus musculus GN=Mia2 PE=1 SV=2	5	6
Clathrin light chain OS=Mus musculus GN=Clta PE=1 SV=1	5	6
Neutral cholesterol ester hydrolase 1 OS=Mus musculus GN=Nceh1 PE=1 SV=1	5	6
Proteasome subunit alpha type-3 OS=Mus musculus GN=Psma3 PE=1 SV=3	5	6
Adenosylhomocysteinase OS=Mus musculus GN=Ahcy PE=1 SV=1	5	6
39S ribosomal protein L47, mitochondrial OS=Mus musculus GN=Mrpl47 PE=1 SV=2	5	6
Endoplasmic reticulum protein SC65 OS=Mus musculus GN=P3h4 PE=1 SV=1	5	6
Ran-specific GTPase-activating protein OS=Mus musculus GN=Ranbp1 PE=1 SV=2	5	6
39S ribosomal protein L11, mitochondrial OS=Mus musculus GN=Mrpl11 PE=1 SV=1	5	6
Srp72 protein (Fragment) OS=Mus musculus GN=Srp72 PE=2 SV=1	5	6
Growth factor receptor-bound protein 10 OS=Mus musculus GN=Grb10 PE=1 SV=2	5	6
Protein Noxp20 OS=Mus musculus GN=Fam114a1 PE=1 SV=1	5	6
Uncharacterized protein OS=Mus musculus GN=Hars PE=2 SV=1	5	6
ATPase family AAA domain-containing protein 1 OS=Mus musculus GN=Atad1 PE=1 SV=1	5	6
Striatin-3 OS=Mus musculus GN=Strn3 PE=1 SV=1	5	6
Rpl30 protein OS=Mus musculus GN=Rpl30 PE=2 SV=1	5	7
RAB21, member RAS oncogene family OS=Mus musculus GN=Rab21 PE=1 SV=1	5	7
Thrombospondin-2 OS=Mus musculus GN=Thbs2 PE=1 SV=2	5	7
DNA damage-binding protein 1 OS=Mus musculus GN=Ddb1 PE=1 SV=2	5	7
14-3-3 protein beta/alpha OS=Mus musculus GN=Ywhab PE=1 SV=3	5	7
Eukaryotic translation initiation factor 3 subunit L OS=Mus musculus GN=Eif3l PE=1 SV=1	5	7
Glutathione S-transferase Mu 1 OS=Mus musculus GN=Gstm1 PE=1 SV=2	5	7
Cytoplasmic dynein 1 light intermediate chain 1 OS=Mus musculus GN=Dync1li1 PE=1 SV=1	5	7
14-3-3 protein eta OS=Mus musculus GN=Ywhah PE=1 SV=2	5	7
F-actin-capping protein subunit alpha-2 OS=Mus musculus GN=Capza2 PE=1 SV=3	5	7
Guanine nucleotide-binding protein subunit alpha-11 OS=Mus musculus GN=Gna11 PE=1 SV=1	5	7
von Willebrand factor A domain-containing protein 5A OS=Mus musculus GN=Vwa5a PE=1 SV=2	5	7
Glycylpeptide N-tetradecanoyltransferase 1 OS=Mus musculus GN=Nmt1 PE=1 SV=1	5	7
Nucleoside diphosphate kinase OS=Mus musculus GN=Gm20390 PE=3 SV=1	5	8
CTP synthase 1 OS=Mus musculus GN=Ctps1 PE=1 SV=2	5	8
Vacuolar protein sorting-associated protein 35 OS=Mus musculus GN=Vps35 PE=2 SV=1	5	8
Heterogeneous nuclear ribonucleoprotein A2/B1 OS=Mus musculus GN=Hnrnpa2b1 PE=2 SV=1	5	8
Acetyl-CoA acetyltransferase, cytosolic OS=Mus musculus GN=Acat2 PE=1 SV=2	5	8
Aspartyl aminopeptidase OS=Mus musculus GN=Dnpep PE=1 SV=2	5	8
28S ribosomal protein S27, mitochondrial OS=Mus musculus GN=Mrps27 PE=1 SV=2	5	8
Protein disulfide-isomerase TMX3 OS=Mus musculus GN=Tmx3 PE=1 SV=2	5	9
Constitutive coactivator of PPAR-gamma-like protein 1 OS=Mus musculus GN=FAM120A PE=1 SV=2	5	9
Importin subunit beta-1 OS=Mus musculus GN=Kpnb1 PE=1 SV=2	5	10
ATP-dependent RNA helicase DDX1 OS=Mus musculus GN=Ddx1 PE=1 SV=1	5	10
26S proteasome regulatory subunit 10B OS=Mus musculus GN=Psmc6 PE=1 SV=1	5	10
ATP-dependent 6-phosphofructokinase, muscle type OS=Mus musculus GN=Pfkm PE=1 SV=3	5	10
26S proteasome non-ATPase regulatory subunit 2 OS=Mus musculus GN=Psmd2 PE=1 SV=1	5	10
Afadin OS=Mus musculus GN=Afdn PE=1 SV=1	5	11
Uncharacterized protein OS=Mus musculus GN=Tpp2 PE=2 SV=1	5	12
Phosphatidylinositol 4-kinase alpha OS=Mus musculus GN=Pi4ka PE=1 SV=1	5	12
Uncharacterized protein OS=Mus musculus GN=Sec23b PE=2 SV=1	5	12
Lysosomal alpha-glucosidase OS=Mus musculus GN=Gaa PE=1 SV=2	4
Valine--tRNA ligase, mitochondrial OS=Mus musculus GN=Vars2 PE=1 SV=2	4
Trifunctional purine biosynthetic protein adenosine-3 OS=Mus musculus GN=Gart PE=1 SV=3	4
Solute carrier family 30 (Zinc transporter), member 9 OS=Mus musculus GN=Slc30a9 PE=2 SV=1	4
Uncharacterized protein OS=Mus musculus GN=Scfd2 PE=2 SV=1	4
Ribosome-releasing factor 2, mitochondrial OS=Mus musculus GN=Gfm2 PE=1 SV=2	4
Ras and Rab interactor 1 OS=Mus musculus GN=Rin1 PE=1 SV=1	4
ER membrane protein complex subunit 7 OS=Mus musculus GN=Emc7 PE=1 SV=1	4	2
Mitochondrial import inner membrane translocase subunit TIM14 OS=Mus musculus GN=Dnajc19 PE=1 SV=1	4	2
MICOS complex subunit MIC13 OS=Mus musculus GN=Mic13 PE=1 SV=1	4	2
G-rich sequence factor 1 OS=Mus musculus GN=Grsf1 PE=1 SV=1	4	2
Actin-related protein 2/3 complex subunit 3 OS=Mus musculus GN=Arpc3 PE=1 SV=3	4	2
Versican core protein OS=Mus musculus GN=Vcan PE=1 SV=2	4	2
Arginine-hydroxylase NDUFAF5, mitochondrial OS=Mus musculus GN=Ndufaf5 PE=1 SV=1	4	2
Proteasome subunit alpha type-2 OS=Mus musculus GN=Psma2 PE=1 SV=3	4	2
Cytochrome c oxidase subunit 2 OS=Mus musculus musculus GN=COX2 PE=3 SV=1	4	2
Par-3 (Partitioning defective 3) homolog (C. elegans) OS=Mus musculus GN=Pard3 PE=1 SV=1	4	2
Evolutionarily conserved-signaling intermediate in Toll pathway, mitochondrial OS=Mus musculus GN=Ecsit PE=1 SV=1	4	2
NADH dehydrogenase [ubiquinone] 1 alpha subcomplex assembly factor 2 OS=Mus musculus GN=Ndufaf2 PE=1 SV=1	4	2
Vacuolar protein sorting 36 (Yeast) OS=Mus musculus GN=Vps36 PE=1 SV=1	4	2
Coiled-coil domain-containing protein 51 OS=Mus musculus GN=Ccdc51 PE=1 SV=1	4	2
Disintegrin and metalloproteinase domain-containing protein 9 OS=Mus musculus GN=Adam9 PE=1 SV=1	4	2
28S ribosomal protein S10, mitochondrial OS=Mus musculus GN=Mrps10 PE=1 SV=1	4	2
Aldhehyde dehydrogenase family 5, subfamily A1 OS=Mus musculus GN=Aldh5a1 PE=1 SV=1	4	2
DnaJ homolog subfamily C member 1 OS=Mus musculus GN=Dnajc1 PE=1 SV=1	4	2
Tumor necrosis factor receptor superfamily member 6 OS=Mus musculus GN=Fas PE=1 SV=2	4	2
Heme oxygenase 1 OS=Mus musculus GN=Hmox1 PE=1 SV=1	4	2
ATP-dependent Clp protease proteolytic subunit, mitochondrial OS=Mus musculus GN=Clpp PE=1 SV=1	4	3
Uncharacterized protein OS=Mus musculus GN=Ssr1 PE=2 SV=1	4	3
MCG115063, isoform CRA_a OS=Mus musculus GN=Rpl36a PE=1 SV=1	4	3
Mitochondrial pyruvate carrier 2 OS=Mus musculus GN=Mpc2 PE=1 SV=1	4	3
28S ribosomal protein S26, mitochondrial OS=Mus musculus GN=Mrps26 PE=1 SV=1	4	3
Mitochondrial Rho GTPase 2 OS=Mus musculus GN=Rhot2 PE=1 SV=1	4	3
ER membrane protein complex subunit 3 OS=Mus musculus GN=Emc3 PE=1 SV=3	4	3
NADH dehydrogenase [ubiquinone] 1 alpha subcomplex subunit 13 OS=Mus musculus GN=Ndufa13 PE=1 SV=3	4	3
Transmembrane 9 superfamily member 4 OS=Mus musculus GN=Tm9sf4 PE=1 SV=1	4	3
Protein NipSnap homolog 3B OS=Mus musculus GN=Nipsnap3b PE=1 SV=1	4	3
39S ribosomal protein L4, mitochondrial OS=Mus musculus GN=Mrpl4 PE=1 SV=1	4	3
ATP-dependent 6-phosphofructokinase, platelet type OS=Mus musculus GN=Pfkp PE=1 SV=1	4	3
CDK5 regulatory subunit-associated protein 3 OS=Mus musculus GN=Cdk5rap3 PE=1 SV=1	4	3
Amyloid-beta A4 protein OS=Mus musculus GN=App PE=1 SV=3	4	3
Sec24-related gene family, member D (S. cerevisiae) OS=Mus musculus GN=Sec24d PE=1 SV=1	4	3
55 kDa erythrocyte membrane protein OS=Mus musculus GN=Mpp1 PE=1 SV=1	4	3
39S ribosomal protein L55, mitochondrial OS=Mus musculus GN=Mrpl55 PE=1 SV=1	4	3
Collagen alpha-1(XII) chain OS=Mus musculus GN=Col12a1 PE=2 SV=3	4	3
Membrane-associated progesterone receptor component 1 OS=Mus musculus GN=Pgrmc1 PE=1 SV=4	4	3
Lysosome membrane protein 2 OS=Mus musculus GN=Scarb2 PE=1 SV=3	4	3
Protein FAM3C OS=Mus musculus GN=Fam3c PE=1 SV=1	4	3
Nucleosome assembly protein 1-like 1 OS=Mus musculus GN=Nap1l1 PE=1 SV=1	4	3
Aspartate--tRNA ligase, mitochondrial OS=Mus musculus GN=Dars2 PE=1 SV=1	4	3
Coiled-coil domain-containing protein 127 OS=Mus musculus GN=Ccdc127 PE=1 SV=2	4	3
Splicing factor, proline- and glutamine-rich OS=Mus musculus GN=Sfpq PE=1 SV=1	4	3
Probable C-mannosyltransferase DPY19L1 OS=Mus musculus GN=Dpy19l1 PE=1 SV=1	4	3
39S ribosomal protein L3, mitochondrial OS=Mus musculus GN=Mrpl3 PE=1 SV=1	4	3
Uncharacterized protein OS=Mus musculus GN=Snx2 PE=2 SV=1	4	3
Peroxisomal biogenesis factor 3 OS=Mus musculus GN=Pex3 PE=1 SV=1	4	3
39S ribosomal protein L2, mitochondrial OS=Mus musculus GN=Mrpl2 PE=1 SV=1	4	3
Fatty acid desaturase 1 OS=Mus musculus GN=Fads1 PE=1 SV=1	4	3
Ubiquinol-cytochrome-c reductase complex assembly factor 2 OS=Mus musculus GN=Uqcc2 PE=1 SV=1	4	3
Gsr protein (Fragment) OS=Mus musculus GN=Gsr PE=2 SV=1	4	3
2-methoxy-6-polyprenyl-1,4-benzoquinol methylase, mitochondrial OS=Mus musculus GN=Coq5 PE=1 SV=2	4	3
Iron-sulfur cluster assembly enzyme ISCU, mitochondrial OS=Mus musculus GN=Iscu PE=1 SV=1	4	3
Atlastin-2 OS=Mus musculus GN=Atl2 PE=1 SV=1	4	3
PDZ and LIM domain protein 7 OS=Mus musculus GN=Pdlim7 PE=1 SV=1	4	3
NADH dehydrogenase [ubiquinone] iron-sulfur protein 5 (Fragment) OS=Mus musculus GN=Ndufs5 PE=1 SV=1	4	3
Adhesion G protein-coupled receptor L2 OS=Mus musculus GN=Adgrl2 PE=1 SV=1	4	3
Thioredoxin-related transmembrane protein 2 OS=Mus musculus GN=Tmx2 PE=1 SV=1	4	3
Methionine--tRNA ligase, cytoplasmic OS=Mus musculus GN=Mars PE=1 SV=1	4	3
SUMO-conjugating enzyme UBC9 (Fragment) OS=Mus musculus GN=Ube2i PE=1 SV=1	4	3
Nuclear protein localization protein 4 homolog OS=Mus musculus GN=Nploc4 PE=1 SV=3	4	3
Hexosyltransferase OS=Mus musculus GN=Chpf2 PE=1 SV=1	4	3
AP-3 complex subunit mu-1 OS=Mus musculus GN=Ap3m1 PE=1 SV=1	4	3
DnaJ homolog subfamily B member 12 OS=Mus musculus GN=Dnajb12 PE=1 SV=2	4	3
Acyl-coenzyme A thioesterase 13 OS=Mus musculus GN=Acot13 PE=1 SV=1	4	4
UBX domain-containing protein 4 OS=Mus musculus GN=Ubxn4 PE=1 SV=1	4	4
Histone H2A OS=Mus musculus GN=H2afj PE=1 SV=1	4	4
Up-regulated during skeletal muscle growth protein 5 OS=Mus musculus GN=Usmg5 PE=1 SV=1	4	4
Very-long-chain enoyl-CoA reductase OS=Mus musculus GN=Tecr PE=1 SV=1	4	4
Neuroplastin OS=Mus musculus GN=Nptn PE=1 SV=3	4	4
40S ribosomal protein S27 (Fragment) OS=Mus musculus GN=Rps27 PE=1 SV=1	4	4
B-cell receptor-associated protein 31 OS=Mus musculus GN=Bcap31 PE=1 SV=4	4	4
GPI transamidase component PIG-T OS=Mus musculus GN=Pigt PE=1 SV=2	4	4
MCG13936 OS=Mus musculus GN=Rpl28 PE=1 SV=1	4	4
Anoctamin-10 OS=Mus musculus GN=Ano10 PE=1 SV=1	4	4
Peptidyl-prolyl cis-trans isomerase FKBP2 OS=Mus musculus GN=Fkbp2 PE=1 SV=1	4	4
Cytochrome b5 OS=Mus musculus GN=Cyb5a PE=1 SV=2	4	4
40S ribosomal protein S24 OS=Mus musculus GN=Rps24 PE=1 SV=1	4	4
Tubulin beta-2A chain OS=Mus musculus GN=Tubb2a PE=1 SV=1	4	4
Vacuolar protein sorting-associated protein 29 (Fragment) OS=Mus musculus GN=Vps29 PE=1 SV=1	4	4
Eukaryotic translation initiation factor 3 subunit E OS=Mus musculus GN=Eif3e PE=1 SV=1	4	4
Protein FAM136A OS=Mus musculus GN=Fam136a PE=1 SV=1	4	4
Sec62 protein (Fragment) OS=Mus musculus GN=Sec62 PE=2 SV=1	4	4
Sequestosome-1 OS=Mus musculus GN=Sqstm1 PE=1 SV=1	4	4
Copper-transporting ATPase 1 OS=Mus musculus GN=Atp7a PE=1 SV=1	4	4
Actin-related protein 2/3 complex subunit 4 OS=Mus musculus GN=Arpc4 PE=1 SV=3	4	4
Peptidyl-prolyl cis-trans isomerase FKBP7 OS=Mus musculus GN=Fkbp7 PE=1 SV=1	4	4
NADH dehydrogenase [ubiquinone] 1 alpha subcomplex subunit 8 OS=Mus musculus GN=Ndufa8 PE=1 SV=3	4	4
Ribosomal protein S23 OS=Mus musculus GN=Rps23 PE=2 SV=1	4	4
Translational activator of cytochrome c oxidase 1 OS=Mus musculus GN=Taco1 PE=1 SV=1	4	4
Sodium/potassium-transporting ATPase subunit beta-3 OS=Mus musculus GN=Atp1b3 PE=1 SV=1	4	4
Serpina3h protein OS=Mus musculus GN=Serpina3h PE=2 SV=1	4	4
Elongator complex protein 1 OS=Mus musculus GN=Elp1 PE=1 SV=2	4	4
Serum paraoxonase/arylesterase 2 OS=Mus musculus GN=Pon2 PE=1 SV=2	4	4
Eukaryotic translation initiation factor 3 subunit D OS=Mus musculus GN=Eif3d PE=1 SV=2	4	4
Transmembrane protein 33 OS=Mus musculus GN=Tmem33 PE=1 SV=1	4	4
Paraplegin OS=Mus musculus GN=Spg7 PE=1 SV=1	4	4
Developmentally-regulated GTP-binding protein 1 OS=Mus musculus GN=Drg1 PE=1 SV=1	4	4
Translation factor Guf1, mitochondrial (Fragment) OS=Mus musculus GN=Guf1 PE=1 SV=2	4	4
Calcium uptake protein 2, mitochondrial OS=Mus musculus GN=Micu2 PE=1 SV=2	4	4
DnaJ homolog subfamily A member 1 OS=Mus musculus GN=Dnaja1 PE=1 SV=1	4	4
Polypyrimidine tract-binding protein 3 OS=Mus musculus GN=Ptbp3 PE=1 SV=1	4	4
Serine--tRNA ligase, mitochondrial OS=Mus musculus GN=Sars2 PE=1 SV=2	4	4
39S ribosomal protein L46, mitochondrial OS=Mus musculus GN=Mrpl46 PE=1 SV=1	4	4
Angiopoietin-related protein 2 OS=Mus musculus GN=Angptl2 PE=2 SV=2	4	4
Protein lin-7 homolog C OS=Mus musculus GN=Lin7c PE=1 SV=2	4	4
PRA1 family protein 3 OS=Mus musculus GN=Arl6ip5 PE=1 SV=2	4	4
Omega-amidase NIT2 OS=Mus musculus GN=Nit2 PE=1 SV=1	4	4
Protein PRRC2C OS=Mus musculus GN=Prrc2c PE=1 SV=1	4	4
Dynamin-2 OS=Mus musculus GN=Dnm2 PE=1 SV=2	4	4
Zinc phosphodiesterase ELAC protein 2 OS=Mus musculus GN=Elac2 PE=1 SV=1	4	4
Zinc finger protein-like 1 OS=Mus musculus GN=Zfpl1 PE=1 SV=1	4	4
Leucyl-tRNA synthetase, mitochondrial OS=Mus musculus GN=Lars2 PE=2 SV=1	4	4
Putative ATP-dependent RNA helicase DHX30 OS=Mus musculus GN=Dhx30 PE=1 SV=1	4	4
Inducible heat shock protein 70 OS=Mus musculus PE=3 SV=1	4	4
Anoctamin-6 OS=Mus musculus GN=Ano6 PE=1 SV=1	4	4
Dynactin subunit 4 OS=Mus musculus GN=Dctn4 PE=1 SV=1	4	4
Deoxyuridine triphosphatase OS=Mus musculus GN=Dut PE=1 SV=1	4	4
Dihydropteridine reductase OS=Mus musculus GN=Qdpr PE=1 SV=1	4	4
Squalene synthase OS=Mus musculus GN=Fdft1 PE=1 SV=2	4	4
Peroxisomal acyl-coenzyme A oxidase 3 OS=Mus musculus GN=Acox3 PE=1 SV=2	4	4
E3 ubiquitin-protein ligase HUWE1 OS=Mus musculus GN=Huwe1 PE=1 SV=1	4	4
Copine-3 OS=Mus musculus GN=Cpne3 PE=1 SV=2	4	4
Peptidyl-tRNA hydrolase ICT1, mitochondrial OS=Mus musculus GN=Mrpl58 PE=1 SV=1	4	4
CD109 antigen OS=Mus musculus GN=Cd109 PE=1 SV=1	4	4
Uncharacterized aarF domain-containing protein kinase 1 OS=Mus musculus GN=Adck1 PE=1 SV=1	4	4
Synaptic functional regulator FMR1 OS=Mus musculus GN=Fmr1 PE=1 SV=1	4	4
ADP-ribose pyrophosphatase, mitochondrial OS=Mus musculus GN=Nudt9 PE=1 SV=1	4	4
Cytochrome c oxidase subunit 6B1 OS=Mus musculus GN=Cox6b1 PE=1 SV=2	4	5
Rho GDP-dissociation inhibitor 1 OS=Mus musculus GN=Arhgdia PE=1 SV=3	4	5
Receptor expression-enhancing protein OS=Mus musculus GN=Reep5 PE=1 SV=1	4	5
MCG15301, isoform CRA_a OS=Mus musculus GN=Rps17 PE=1 SV=1	4	5
Actin, alpha cardiac muscle 1 OS=Mus musculus GN=Actc1 PE=1 SV=1	4	5
Complement component receptor 1-like protein OS=Mus musculus GN=Cr1l PE=1 SV=1	4	5
Poly(RC) binding protein 2 OS=Mus musculus GN=Pcbp2 PE=2 SV=1	4	5
Uncharacterized protein OS=Mus musculus GN=Ptbp1 PE=2 SV=1	4	5
Ferritin heavy chain OS=Mus musculus GN=Fth1 PE=1 SV=2	4	5
14-3-3 protein gamma OS=Mus musculus GN=Ywhag PE=1 SV=2	4	5
GTPase Era, mitochondrial OS=Mus musculus GN=Eral1 PE=2 SV=1	4	5
Cysteine and glycine-rich protein 1 OS=Mus musculus GN=Csrp1 PE=1 SV=3	4	5
Mitochondrial import receptor subunit TOM34 OS=Mus musculus GN=Tomm34 PE=1 SV=1	4	5
Integrin beta-5 OS=Mus musculus GN=Itgb5 PE=1 SV=2	4	5
72 kDa type IV collagenase OS=Mus musculus GN=Mmp2 PE=1 SV=1	4	5
Protein canopy homolog 4 OS=Mus musculus GN=Cnpy4 PE=1 SV=1	4	5
Peptidyl-prolyl cis-trans isomerase NIMA-interacting 4 OS=Mus musculus GN=Pin4 PE=1 SV=1	4	5
Nidogen-1 OS=Mus musculus GN=Nid1 PE=1 SV=2	4	5
CDGSH iron-sulfur domain-containing protein 2 OS=Mus musculus GN=Cisd2 PE=1 SV=1	4	5
Peptidylprolyl isomerase OS=Mus musculus GN=Fkbp3 PE=1 SV=1	4	5
Ifi202b OS=Mus musculus PE=2 SV=1	4	5
Ferrochelatase, mitochondrial OS=Mus musculus GN=Fech PE=1 SV=2	4	5
60S ribosomal protein L18 OS=Mus musculus GN=Rpl18 PE=1 SV=1	4	5
Signal recognition particle subunit SRP68 OS=Mus musculus GN=Srp68 PE=1 SV=1	4	5
Uncharacterized protein OS=Mus musculus GN=Surf4 PE=2 SV=1	4	5
Erythrocyte band 7 integral membrane protein OS=Mus musculus GN=Stom PE=1 SV=3	4	5
Squalene monooxygenase OS=Mus musculus GN=Sqle PE=2 SV=1	4	5
Gamma-adducin OS=Mus musculus GN=Add3 PE=1 SV=2	4	5
Four and a half LIM domains protein 2 OS=Mus musculus GN=Fhl2 PE=1 SV=1	4	5
Transcriptional activator protein Pur-beta OS=Mus musculus GN=Purb PE=1 SV=3	4	5
Sorting nexin OS=Mus musculus GN=Snx9 PE=2 SV=1	4	5
Mitogen-activated protein kinase kinase kinase kinase 4 OS=Mus musculus GN=Map4k4 PE=1 SV=1	4	5
Malonyl-CoA-acyl carrier protein transacylase, mitochondrial OS=Mus musculus GN=Mcat PE=1 SV=3	4	5
Uncharacterized protein OS=Mus musculus GN=Snx1 PE=2 SV=1	4	5
Carboxypeptidase OS=Mus musculus GN=Scpep1 PE=2 SV=1	4	5
28S ribosomal protein S17, mitochondrial OS=Mus musculus GN=Mrps17 PE=1 SV=1	4	5
Actin-related protein 2/3 complex subunit 5 OS=Mus musculus GN=Arpc5 PE=1 SV=3	4	5
Inactive hydroxysteroid dehydrogenase-like protein 1 OS=Mus musculus GN=Hsdl1 PE=1 SV=1	4	5
Eukaryotic peptide chain release factor GTP-binding subunit ERF3A OS=Mus musculus GN=Gspt1 PE=1 SV=2	4	5
L-2-hydroxyglutarate dehydrogenase, mitochondrial OS=Mus musculus GN=L2hgdh PE=1 SV=1	4	5
Protocadherin gamma C3 OS=Mus musculus GN=Pcdhgc3 PE=1 SV=1	4	5
Aldose reductase OS=Mus musculus GN=Akr1b1 PE=1 SV=3	4	5
Uncharacterized protein (Fragment) OS=Mus musculus GN=Uap1l1 PE=2 SV=1	4	5
Elongation factor 1-beta OS=Mus musculus GN=Eef1b PE=1 SV=5	4	5
Eukaryotic translation initiation factor 4, gamma 2 OS=Mus musculus GN=Eif4g2 PE=2 SV=1	4	5
Protein NipSnap homolog 2 OS=Mus musculus GN=Nipsnap2 PE=1 SV=1	4	5
Glyoxalase domain-containing protein 4 OS=Mus musculus GN=Glod4 PE=1 SV=1	4	5
Uncharacterized protein OS=Mus musculus GN=Psmc5 PE=2 SV=1	4	5
Uncharacterized protein OS=Mus musculus GN=Tmod3 PE=2 SV=1	4	5
SH3-domain GRB2-like 1 OS=Mus musculus GN=Sh3gl1 PE=1 SV=1	4	5
Syntaxin-4 OS=Mus musculus GN=Stx4 PE=1 SV=1	4	5
Uncharacterized protein OS=Mus musculus GN=Cnbp PE=2 SV=1	4	5
Prolyl endopeptidase OS=Mus musculus GN=Prep PE=1 SV=1	4	5
Structural maintenance of chromosomes protein OS=Mus musculus GN=Smc2 PE=2 SV=1	4	5
Hematopoietic progenitor cell antigen CD34 OS=Mus musculus GN=Cd34 PE=1 SV=1	4	6
Signal peptidase complex subunit 2 OS=Mus musculus GN=Spcs2 PE=1 SV=1	4	6
Eukaryotic translation initiation factor 3 subunit B OS=Mus musculus GN=Eif3b PE=1 SV=1	4	6
Protein EFR3 homolog A OS=Mus musculus GN=Efr3a PE=1 SV=1	4	6
S-adenosylhomocysteine hydrolase-like protein 1 OS=Mus musculus GN=Ahcyl1 PE=1 SV=1	4	6
Protein phosphatase 1 regulatory subunit 12A OS=Mus musculus GN=Ppp1r12a PE=1 SV=2	4	6
Aspartate aminotransferase, cytoplasmic OS=Mus musculus GN=Got1 PE=1 SV=3	4	6
Hsc70-interacting protein OS=Mus musculus GN=St13 PE=1 SV=1	4	6
cAMP-dependent protein kinase type I-alpha regulatory subunit OS=Mus musculus GN=Prkar1a PE=1 SV=3	4	6
Mitogen-activated protein kinase 3 OS=Mus musculus GN=Mapk3 PE=1 SV=5	4	6
26S proteasome non-ATPase regulatory subunit 1 OS=Mus musculus GN=Psmd1 PE=1 SV=1	4	6
Lamin-B receptor OS=Mus musculus GN=Lbr PE=1 SV=2	4	6
Uncharacterized protein OS=Mus musculus GN=Hnrnpm PE=2 SV=1	4	6
Huntingtin-interacting protein 1 OS=Mus musculus GN=Hip1 PE=1 SV=2	4	6
E3 ubiquitin-protein ligase UBR4 OS=Mus musculus GN=Ubr4 PE=1 SV=1	4	6
Serine/threonine-protein phosphatase 2A catalytic subunit alpha isoform OS=Mus musculus GN=Ppp2ca PE=1 SV=1	4	6
High mobility group protein B1 (Fragment) OS=Mus musculus GN=Hmgb1 PE=1 SV=1	4	7
MCG12304 OS=Mus musculus GN=Rpl22 PE=1 SV=1	4	7
Rab22B OS=Mus musculus GN=Rab31 PE=1 SV=1	4	7
Peroxiredoxin-2 OS=Mus musculus GN=Prdx2 PE=1 SV=3	4	7
Calcyclin-binding protein OS=Mus musculus GN=Cacybp PE=1 SV=1	4	7
Arf-GAP with SH3 domain, ANK repeat and PH domain-containing protein 1 OS=Mus musculus GN=Asap1 PE=1 SV=2	4	8
Glutathione S-transferase omega-1 OS=Mus musculus GN=Gsto1 PE=1 SV=2	4	8
Acetyl-CoA carboxylase 1 OS=Mus musculus GN=Acaca PE=1 SV=1	4	9
Phosphatidylglycerophosphatase and protein-tyrosine phosphatase 1 OS=Mus musculus GN=Ptpmt1 PE=1 SV=1	3
NADH dehydrogenase [ubiquinone] flavoprotein 3, mitochondrial OS=Mus musculus GN=Ndufv3 PE=1 SV=1	3
Dual specificity mitogen-activated protein kinase kinase 2 OS=Mus musculus GN=Map2k2 PE=1 SV=2	3
Acylpyruvase FAHD1, mitochondrial OS=Mus musculus GN=Fahd1 PE=1 SV=2	3
Nuclear factor NF-kappa-B p100 subunit OS=Mus musculus GN=Nfkb2 PE=1 SV=1	3
Chloride channel CLIC-like 1, isoform CRA_a OS=Mus musculus GN=Clcc1 PE=1 SV=1	3
Cyclin-dependent kinase 1 OS=Mus musculus GN=Cdk1 PE=1 SV=3	3
Lysyl oxidase homolog 3 OS=Mus musculus GN=Loxl3 PE=1 SV=2	3
Eukaryotic translation initiation factor 4B OS=Mus musculus GN=Eif4b PE=1 SV=1	3
ATP-binding cassette sub-family D member 1 OS=Mus musculus GN=Abcd1 PE=1 SV=1	3
Heterogeneous nuclear ribonucleoprotein H2 OS=Mus musculus GN=Hnrnph2 PE=1 SV=1	3
Inositol 1,4,5-trisphosphate receptor type 2 OS=Mus musculus GN=Itpr2 PE=1 SV=4	3
1-acyl-sn-glycerol-3-phosphate acyltransferase gamma OS=Mus musculus GN=Agpat3 PE=1 SV=2	3
ATP-dependent RNA helicase DHX29 OS=Mus musculus GN=Dhx29 PE=1 SV=1	3
Ubiquitinyl hydrolase 1 OS=Mus musculus GN=Usp5 PE=1 SV=1	3
28S ribosomal protein S11, mitochondrial OS=Mus musculus GN=Mrps11 PE=1 SV=1	3
Gamma-glutamyl carboxylase OS=Mus musculus GN=Ggcx PE=1 SV=1	3
F-box/LRR-repeat protein 20 OS=Mus musculus GN=Fbxl20 PE=1 SV=3	3
Probable glutamate--tRNA ligase, mitochondrial OS=Mus musculus GN=Ears2 PE=1 SV=1	3
Interferon-induced, double-stranded RNA-activated protein kinase OS=Mus musculus GN=Eif2ak2 PE=1 SV=2	3
Far upstream element-binding protein 2 OS=Mus musculus GN=Khsrp PE=1 SV=2	3
Dystroglycan OS=Mus musculus GN=Dag1 PE=1 SV=4	3
Atypical kinase COQ8B, mitochondrial OS=Mus musculus GN=Coq8b PE=1 SV=1	3
Transmembrane protein 55b (Fragment) OS=Mus musculus GN=Tmem55b PE=1 SV=1	3
Endoplasmic reticulum lectin 1 OS=Mus musculus GN=Erlec1 PE=1 SV=1	3
Oxidoreductase NAD-binding domain-containing protein 1 OS=Mus musculus GN=Oxnad1 PE=1 SV=2	3
Isopentenyl-diphosphate Delta-isomerase 1 OS=Mus musculus GN=Idi1 PE=1 SV=1	3
39S ribosomal protein L51, mitochondrial OS=Mus musculus GN=Mrpl51 PE=1 SV=1	3
Twisted gastrulation protein homolog 1 OS=Mus musculus GN=Twsg1 PE=1 SV=1	3
Serum paraoxonase/lactonase 3 OS=Mus musculus GN=Pon3 PE=1 SV=2	3
Golgi SNAP receptor complex member 1 OS=Mus musculus GN=Gosr1 PE=1 SV=2	3
Superoxide dismutase [Cu-Zn] OS=Mus musculus GN=Sod3 PE=2 SV=1	3
Ribonuclease 4 OS=Mus musculus GN=Rnase4 PE=1 SV=1	3
Calcium-independent phospholipase A2-gamma OS=Mus musculus GN=Pnpla8 PE=1 SV=1	3
39S ribosomal protein L28, mitochondrial OS=Mus musculus GN=Mrpl28 PE=1 SV=3	3	2
BCL2-associated athanogene 3 OS=Mus musculus GN=Bag3 PE=2 SV=1	3	2
RIKEN cDNA 1110020P15, isoform CRA_b OS=Mus musculus GN=Uqcr10 PE=1 SV=1	3	2
Uncharacterized protein OS=Mus musculus GN=Cyb5b PE=2 SV=1	3	2
Mitochondrial import inner membrane translocase subunit TIM16 OS=Mus musculus GN=Pam16 PE=1 SV=1	3	2
Golgi integral membrane protein 4 OS=Mus musculus GN=Golim4 PE=1 SV=1	3	2
26S proteasome non-ATPase regulatory subunit 6 OS=Mus musculus GN=Psmd6 PE=1 SV=1	3	2
Transmembrane emp24 domain trafficking protein 2 OS=Mus musculus GN=Tmed2 PE=1 SV=1	3	2
Nbas protein (Fragment) OS=Mus musculus GN=Nbas PE=2 SV=1	3	2
Uncharacterized protein C17orf62 homolog OS=Mus musculus PE=1 SV=2	3	2
Nitric oxide-associated protein 1 OS=Mus musculus GN=Noa1 PE=1 SV=1	3	2
Vesicle transport protein USE1 OS=Mus musculus GN=Use1 PE=1 SV=1	3	2
NADH dehydrogenase [ubiquinone] iron-sulfur protein 7, mitochondrial OS=Mus musculus GN=Ndufs7 PE=1 SV=1	3	2
BolA-like protein 3 OS=Mus musculus GN=Bola3 PE=1 SV=1	3	2
Importin-7 OS=Mus musculus GN=Ipo7 PE=1 SV=2	3	2
Thbd protein OS=Mus musculus GN=Thbd PE=1 SV=1	3	2
ATPase inhibitor, mitochondrial OS=Mus musculus GN=Atpif1 PE=1 SV=2	3	2
Sorting nexin 3, isoform CRA_b OS=Mus musculus GN=Snx3 PE=1 SV=1	3	2
Derlin-1 OS=Mus musculus GN=Derl1 PE=1 SV=1	3	2
O-acetyl-ADP-ribose deacetylase MACROD1 OS=Mus musculus GN=Macrod1 PE=1 SV=2	3	2
Syntaxin-7 OS=Mus musculus GN=Stx7 PE=1 SV=1	3	2
Armadillo repeat-containing protein 1 OS=Mus musculus GN=Armc1 PE=1 SV=1	3	2
MCG5603 OS=Mus musculus GN=Ndufa11 PE=1 SV=1	3	2
Tryptophan--tRNA ligase, mitochondrial OS=Mus musculus GN=Wars2 PE=1 SV=2	3	2
Clasp2 protein OS=Mus musculus GN=Clasp2 PE=2 SV=1	3	2
Nuclear fragile X mental retardation-interacting protein 2 OS=Mus musculus GN=Nufip2 PE=1 SV=1	3	2
Importin subunit alpha-1 OS=Mus musculus GN=Kpna2 PE=1 SV=2	3	2
Chitobiosyldiphosphodolichol beta-mannosyltransferase OS=Mus musculus GN=Alg1 PE=1 SV=3	3	2
NADH dehydrogenase [ubiquinone] 1 alpha subcomplex subunit 6 OS=Mus musculus GN=Ndufa6 PE=1 SV=1	3	2
39S ribosomal protein L43, mitochondrial OS=Mus musculus GN=Mrpl43 PE=1 SV=1	3	2
ES1 protein homolog, mitochondrial OS=Mus musculus GN=D10Jhu81e PE=1 SV=1	3	2
GRAM domain-containing protein 4 OS=Mus musculus GN=Gramd4 PE=1 SV=1	3	2
Acid ceramidase OS=Mus musculus GN=Asah1 PE=1 SV=1	3	2
Basigin OS=Mus musculus GN=Bsg PE=1 SV=2	3	2
Torsin OS=Mus musculus GN=Tor1a PE=1 SV=1	3	2
Na(+)/H(+) exchange regulatory cofactor NHE-RF1 OS=Mus musculus GN=Slc9a3r1 PE=1 SV=3	3	2
Signal recognition particle 54 kDa protein OS=Mus musculus GN=Srp54b PE=1 SV=1	3	2
Semaphorin-3C OS=Mus musculus GN=Sema3c PE=1 SV=2	3	2
Lon protease homolog 2, peroxisomal OS=Mus musculus GN=Lonp2 PE=1 SV=1	3	2
Cytosolic phospholipase A2 OS=Mus musculus GN=Pla2g4a PE=1 SV=1	3	2
GTP-binding protein 1 OS=Mus musculus GN=Gtpbp1 PE=1 SV=2	3	2
NAD(P)H dehydrogenase [quinone] 1 OS=Mus musculus GN=Nqo1 PE=1 SV=3	3	2
Uncharacterized protein OS=Mus musculus GN=Ube2j1 PE=2 SV=1	3	2
Mixed lineage kinase domain-like protein OS=Mus musculus GN=Mlkl PE=1 SV=1	3	2
Acyl-CoA dehydrogenase family member 10 OS=Mus musculus GN=Acad10 PE=1 SV=1	3	2
Mitochondrial import inner membrane translocase subunit Tim13 OS=Mus musculus GN=Timm13 PE=1 SV=1	3	2
Calpain-6 OS=Mus musculus GN=Capn6 PE=1 SV=2	3	2
Histocompatibility 13 (Fragment) OS=Mus musculus GN=H13 PE=1 SV=1	3	2
Optic atrophy 3 protein homolog OS=Mus musculus GN=Opa3 PE=1 SV=1	3	2
Vacuolar protein sorting-associated protein 26B OS=Mus musculus GN=Vps26b PE=1 SV=1	3	2
Armadillo repeat-containing X-linked protein 2 OS=Mus musculus GN=Armcx2 PE=2 SV=2	3	2
Cyclin-dependent kinase 6 OS=Mus musculus GN=Cdk6 PE=1 SV=2	3	2
Caveolae-associated protein 3 OS=Mus musculus GN=Cavin3 PE=1 SV=1	3	2
Protein CDV3 OS=Mus musculus GN=Cdv3 PE=1 SV=1	3	2
Protein-L-isoaspartate O-methyltransferase OS=Mus musculus GN=Pcmt1 PE=1 SV=1	3	2
Uncharacterized protein OS=Mus musculus GN=Serpinb9b PE=2 SV=1	3	2
Mammalian sterile twenty 3 kinase OS=Mus musculus GN=Stk24 PE=1 SV=1	3	2
28S ribosomal protein S16, mitochondrial OS=Mus musculus GN=Mrps16 PE=1 SV=1	3	2
Matrilin-2 OS=Mus musculus GN=Matn2 PE=1 SV=1	3	2
Uncharacterized protein OS=Mus musculus GN=Rpl37a PE=2 SV=1	3	3
Myeloid-associated differentiation marker OS=Mus musculus GN=Myadm PE=1 SV=2	3	3
Gag protein OS=Mus musculus GN=gag PE=4 SV=1	3	3
Type I epidermal keratin mRNA, 3'end (Fragment) OS=Mus musculus PE=2 SV=1	3	3
LIM and senescent cell antigen-like-containing domain protein OS=Mus musculus GN=Lims1 PE=1 SV=1	3	3
Protein S100-A4 (Fragment) OS=Mus musculus GN=S100a4 PE=1 SV=1	3	3
ATP synthase subunit e, mitochondrial OS=Mus musculus GN=Atp5i PE=1 SV=2	3	3
Myeloid-derived growth factor OS=Mus musculus GN=Mydgf PE=1 SV=1	3	3
39S ribosomal protein L14, mitochondrial OS=Mus musculus GN=Mrpl14 PE=1 SV=1	3	3
Peptidyl-prolyl cis-trans isomerase F, mitochondrial OS=Mus musculus GN=Ppif PE=1 SV=1	3	3
Eukaryotic translation initiation factor 1A OS=Mus musculus GN=Eif1a PE=2 SV=3	3	3
Regulator of microtubule dynamics protein 3 OS=Mus musculus GN=Rmdn3 PE=1 SV=2	3	3
Cytochrome b-c1 complex subunit 6, mitochondrial OS=Mus musculus GN=Uqcrh PE=1 SV=2	3	3
FERM, ARHGEF and pleckstrin domain-containing protein 1 OS=Mus musculus GN=Farp1 PE=1 SV=1	3	3
Microtubule-associated protein 1A OS=Mus musculus GN=Map1a PE=1 SV=1	3	3
ATP synthase subunit epsilon, mitochondrial OS=Mus musculus GN=Atp5e PE=1 SV=2	3	3
Col4a5 protein OS=Mus musculus GN=Col4a5 PE=1 SV=1	3	3
MCG116386, isoform CRA_a OS=Mus musculus GN=Rbm3 PE=1 SV=1	3	3
C-type mannose receptor 2 OS=Mus musculus GN=Mrc2 PE=1 SV=3	3	3
Transmembrane 9 superfamily member (Fragment) OS=Mus musculus GN=Tm9sf3 PE=2 SV=1	3	3
NADH dehydrogenase [ubiquinone] 1 beta subcomplex subunit 4 OS=Mus musculus GN=Ndufb4 PE=1 SV=3	3	3
Nascent polypeptide-associated complex subunit alpha OS=Mus musculus GN=Naca PE=1 SV=1	3	3
RAB1B, member RAS oncogene family, isoform CRA_c OS=Mus musculus GN=Rab1b PE=1 SV=1	3	3
Prostaglandin E synthase 3 OS=Mus musculus GN=Ptges3 PE=1 SV=1	3	3
Phosphatidylserine decarboxylase proenzyme, mitochondrial OS=Mus musculus GN=Pisd PE=3 SV=1	3	3
Aminoacyl tRNA synthase complex-interacting multifunctional protein 2 OS=Mus musculus GN=Aimp2 PE=1 SV=2	3	3
Carboxypeptidase E OS=Mus musculus GN=Cpe PE=1 SV=2	3	3
Mitochondrial glutamate carrier 1 OS=Mus musculus GN=Slc25a22 PE=1 SV=1	3	3
Calcium uptake protein 1, mitochondrial OS=Mus musculus GN=Micu1 PE=1 SV=1	3	3
RAB8A, member RAS oncogene family, isoform CRA_a OS=Mus musculus GN=Rab8a PE=1 SV=1	3	3
Serine hydrolase-like protein OS=Mus musculus GN=Serhl PE=1 SV=1	3	3
Coiled-coil domain-containing protein 134 OS=Mus musculus GN=Ccdc134 PE=1 SV=1	3	3
Reticulon-3 OS=Mus musculus GN=Rtn3 PE=1 SV=2	3	3
MICOS complex subunit Mic26 OS=Mus musculus GN=Apoo PE=1 SV=2	3	3
Estradiol 17-beta-dehydrogenase 11 OS=Mus musculus GN=Hsd17b11 PE=1 SV=1	3	3
Signal peptidase complex catalytic subunit SEC11 OS=Mus musculus GN=Sec11a PE=1 SV=1	3	3
39S ribosomal protein L23, mitochondrial OS=Mus musculus GN=Mrpl23 PE=1 SV=1	3	3
Activator of 90 kDa heat shock protein ATPase homolog 1 OS=Mus musculus GN=Ahsa1 PE=1 SV=2	3	3
Protein FAM98A OS=Mus musculus GN=Fam98a PE=1 SV=1	3	3
Thioredoxin OS=Mus musculus GN=Txn PE=1 SV=3	3	3
Guanine nucleotide-binding protein G(q) subunit alpha OS=Mus musculus GN=Gnaq PE=1 SV=4	3	3
Rab3 GTPase-activating protein non-catalytic subunit OS=Mus musculus GN=Rab3gap2 PE=1 SV=1	3	3
Pyridoxal kinase OS=Mus musculus GN=Pdxk PE=1 SV=1	3	3
COP9 signalosome complex subunit 4 OS=Mus musculus GN=Cops4 PE=1 SV=1	3	3
Ancient ubiquitous protein 1 OS=Mus musculus GN=Aup1 PE=1 SV=1	3	3
Choline transporter-like protein 2 OS=Mus musculus GN=Slc44a2 PE=1 SV=1	3	3
Uncharacterized protein OS=Mus musculus GN=Zyx PE=2 SV=1	3	3
Oncostatin-M-specific receptor subunit beta OS=Mus musculus GN=Osmr PE=1 SV=1	3	3
Caveolae-associated protein 2 OS=Mus musculus GN=Cavin2 PE=1 SV=3	3	3
Protein transport protein Sec61 subunit beta OS=Mus musculus GN=Sec61b PE=1 SV=3	3	3
Glutamyl-tRNA(Gln) amidotransferase subunit B, mitochondrial OS=Mus musculus GN=Gatb PE=1 SV=1	3	3
DbpA murine homologue OS=Mus musculus GN=Ybx3 PE=2 SV=1	3	3
Secretory carrier-associated membrane protein OS=Mus musculus GN=Gm45927 PE=2 SV=1	3	3
Fermitin family homolog 2 OS=Mus musculus GN=Fermt2 PE=1 SV=1	3	3
Unconventional myosin-VI OS=Mus musculus GN=Myo6 PE=1 SV=1	3	3
Methionine aminopeptidase 1 OS=Mus musculus GN=Metap1 PE=1 SV=1	3	3
Mammalian ependymin-related protein 1 OS=Mus musculus GN=Epdr1 PE=1 SV=1	3	3
Glucosylceramidase OS=Mus musculus GN=Gba PE=1 SV=1	3	3
NSFL1 cofactor p47 OS=Mus musculus GN=Nsfl1c PE=1 SV=1	3	3
Adenylate kinase isoenzyme 1 OS=Mus musculus GN=Ak1 PE=1 SV=1	3	3
MICOS complex subunit OS=Mus musculus GN=Chchd6 PE=1 SV=1	3	3
Obg-like ATPase 1 OS=Mus musculus GN=Ola1 PE=1 SV=1	3	3
Tumor protein D54 OS=Mus musculus GN=Tpd52l2 PE=1 SV=1	3	3
Actin-related protein 10 OS=Mus musculus GN=Actr10 PE=1 SV=2	3	3
[3-methyl-2-oxobutanoate dehydrogenase [lipoamide]] kinase, mitochondrial OS=Mus musculus GN=Bckdk PE=1 SV=1	3	3
Eukaryotic translation initiation factor 4H OS=Mus musculus GN=Eif4h PE=1 SV=3	3	3
Growth arrest-specific protein 1 OS=Mus musculus GN=Gas1 PE=1 SV=1	3	3
Oxysterol-binding protein OS=Mus musculus GN=Osbpl8 PE=1 SV=1	3	3
UPF0160 protein MYG1, mitochondrial (Fragment) OS=Mus musculus GN=Myg1 PE=1 SV=1	3	3
40S ribosomal protein S21 OS=Mus musculus GN=mCG_6739 PE=2 SV=1	3	3
Coatomer subunit gamma-2 OS=Mus musculus GN=Copg2 PE=1 SV=1	3	3
Volume-regulated anion channel subunit LRRC8C OS=Mus musculus GN=Lrrc8c PE=1 SV=1	3	3
Lethal(2) giant larvae protein homolog 1 OS=Mus musculus GN=Llgl1 PE=1 SV=1	3	3
Protein PRRC2A OS=Mus musculus GN=Prrc2a PE=1 SV=1	3	3
Cdc42-interacting protein 4 OS=Mus musculus GN=Trip10 PE=1 SV=2	3	3
Copine-1 OS=Mus musculus GN=Cpne1 PE=1 SV=1	3	3
AHNAK nucleoprotein 2 (Fragment) OS=Mus musculus GN=Ahnak2 PE=1 SV=8	3	3
Vesicle transport through interaction with t-SNAREs homolog 1B (Fragment) OS=Mus musculus GN=Vti1b PE=1 SV=1	3	3
Coiled-coil domain-containing protein 90B, mitochondrial OS=Mus musculus GN=Ccdc90b PE=1 SV=1	3	3
Mitochondrial ornithine transporter 1 OS=Mus musculus GN=Slc25a15 PE=1 SV=1	3	3
Mitochondrial fission regulator 1-like OS=Mus musculus GN=Mtfr1l PE=1 SV=1	3	3
Retinol dehydrogenase 10 OS=Mus musculus GN=Rdh10 PE=1 SV=2	3	3
Prenylcysteine oxidase-like OS=Mus musculus GN=Pcyox1l PE=1 SV=1	3	3
Armadillo repeat protein deleted in velo-cardio-facial syndrome homolog OS=Mus musculus GN=Arvcf PE=1 SV=2	3	3
Pyruvate dehydrogenase phosphatase regulatory subunit, mitochondrial OS=Mus musculus GN=Pdpr PE=1 SV=1	3	3
28S ribosomal protein S5, mitochondrial OS=Mus musculus GN=Mrps5 PE=1 SV=1	3	3
Nardilysin, N-arginine dibasic convertase, NRD convertase 1 OS=Mus musculus GN=Nrd1 PE=1 SV=1	3	3
Keratin, type II cytoskeletal 1 OS=Mus musculus GN=Krt1 PE=1 SV=4	3	4
MCG13615, isoform CRA_a OS=Mus musculus GN=Rpl38 PE=1 SV=1	3	4
MCG3574 OS=Mus musculus GN=Rps20 PE=1 SV=1	3	4
40S ribosomal protein S25 OS=Mus musculus GN=Rps25 PE=1 SV=1	3	4
Cytochrome b-c1 complex subunit Rieske, mitochondrial OS=Mus musculus GN=Uqcrfs1 PE=1 SV=1	3	4
Microsomal glutathione S-transferase 3 OS=Mus musculus GN=Mgst3 PE=1 SV=1	3	4
Mitotic checkpoint protein BUB3 OS=Mus musculus GN=Bub3 PE=1 SV=1	3	4
Protein canopy homolog 3 OS=Mus musculus GN=Cnpy3 PE=1 SV=1	3	4
Acyl-CoA-binding protein OS=Mus musculus GN=Dbi PE=1 SV=2	3	4
Dynein light chain 2, cytoplasmic OS=Mus musculus GN=Dynll2 PE=1 SV=1	3	4
Heterogeneous nuclear ribonucleoprotein F OS=Mus musculus GN=Hnrnpf PE=1 SV=3	3	4
Laminin receptor (Fragment) OS=Mus musculus GN=Rpsa PE=2 SV=1	3	4
Peptidyl-prolyl cis-trans isomerase FKBP1A OS=Mus musculus GN=Fkbp1a PE=1 SV=2	3	4
Putative phospholipase B-like 2 OS=Mus musculus GN=Plbd2 PE=1 SV=2	3	4
39S ribosomal protein L40, mitochondrial OS=Mus musculus GN=Mrpl40 PE=1 SV=1	3	4
Flap endonuclease 1 OS=Mus musculus GN=Fen1 PE=2 SV=1	3	4
STIP1 homology and U box-containing protein 1 OS=Mus musculus GN=Stub1 PE=1 SV=1	3	4
3-ketodihydrosphingosine reductase OS=Mus musculus GN=Kdsr PE=1 SV=1	3	4
Lysosome-associated membrane glycoprotein 1 OS=Mus musculus GN=Lamp1 PE=1 SV=2	3	4
MCG127675 OS=Mus musculus GN=Ube2v2 PE=2 SV=1	3	4
Sphingolipid delta(4)-desaturase DES1 OS=Mus musculus GN=Degs1 PE=1 SV=1	3	4
MCG1032217 OS=Mus musculus GN=Ube2l3 PE=1 SV=1	3	4
Metaxin-2 OS=Mus musculus GN=Mtx2 PE=1 SV=1	3	4
Coagulation factor V OS=Mus musculus GN=F5 PE=1 SV=1	3	4
Peroxiredoxin-6 OS=Mus musculus GN=Prdx6 PE=1 SV=1	3	4
Ras-related protein Rab-34 OS=Mus musculus GN=Rab34 PE=1 SV=1	3	4
X-prolyl aminopeptidase (Aminopeptidase P) 1, soluble, isoform CRA_b OS=Mus musculus GN=Xpnpep1 PE=1 SV=1	3	4
Thioredoxin reductase 1, cytoplasmic OS=Mus musculus GN=Txnrd1 PE=1 SV=3	3	4
DnaJ homolog subfamily C member 25 OS=Mus musculus GN=Dnajc25 PE=1 SV=1	3	4
Transmembrane emp24 domain containing 1 OS=Mus musculus GN=Tmed1 PE=2 SV=1	3	4
Torsin-3A OS=Mus musculus GN=Tor3a PE=1 SV=2	3	4
Probable glutathione peroxidase 8 OS=Mus musculus GN=Gpx8 PE=1 SV=1	3	4
Cystatin-C OS=Mus musculus GN=Cst3 PE=1 SV=2	3	4
Neudesin OS=Mus musculus GN=Nenf PE=1 SV=1	3	4
Epsin-2 OS=Mus musculus GN=Epn2 PE=1 SV=1	3	4
Uncharacterized protein OS=Mus musculus GN=Trim25 PE=2 SV=1	3	4
Receptor-type tyrosine-protein phosphatase alpha OS=Mus musculus GN=Ptpra PE=1 SV=3	3	4
ADP-ribosylation factor GTPase-activating protein 1 OS=Mus musculus GN=Arfgap1 PE=1 SV=2	3	4
Microtubule-actin cross-linking factor 1 (Fragment) OS=Mus musculus GN=Macf1 PE=1 SV=1	3	4
Sialic acid synthase OS=Mus musculus GN=Nans PE=1 SV=1	3	4
Kelch-like protein 22 OS=Mus musculus GN=Klhl22 PE=1 SV=1	3	4
Uncharacterized protein OS=Mus musculus GN=Wls PE=2 SV=1	3	4
THO complex subunit 4 OS=Mus musculus GN=Alyref PE=1 SV=3	3	5
Embigin OS=Mus musculus GN=Emb PE=1 SV=2	3	5
Proteasome subunit beta type-4 OS=Mus musculus GN=Psmb4 PE=1 SV=1	3	5
Neural cell adhesion molecule 1 OS=Mus musculus GN=Ncam1 PE=1 SV=1	3	5
Proteasome subunit beta type-5 OS=Mus musculus GN=Psmb5 PE=1 SV=3	3	5
Endoplasmic reticulum aminopeptidase 1 OS=Mus musculus GN=Erap1 PE=1 SV=2	3	5
GTPase NRas (Fragment) OS=Mus musculus GN=Nras PE=1 SV=1	3	5
Serine/threonine kinase receptor associated protein OS=Mus musculus GN=Strap PE=1 SV=1	3	5
Heterogeneous nuclear ribonucleoprotein A/B OS=Mus musculus GN=Hnrnpab PE=1 SV=1	3	5
Annexin OS=Mus musculus GN=Anxa7 PE=1 SV=1	3	5
DNA-(apurinic or apyrimidinic site) lyase OS=Mus musculus GN=Apex1 PE=1 SV=2	3	5
Collectin-12 OS=Mus musculus GN=Colec12 PE=1 SV=1	3	5
Methylglutaconyl-CoA hydratase, mitochondrial OS=Mus musculus GN=Auh PE=1 SV=1	3	5
Protein/nucleic acid deglycase DJ-1 OS=Mus musculus GN=Park7 PE=1 SV=1	3	5
ATPase Asna1 OS=Mus musculus GN=Asna1 PE=1 SV=2	3	5
Ufm1-specific protease 2 OS=Mus musculus GN=Ufsp2 PE=1 SV=1	3	5
Transmembrane protein 120A OS=Mus musculus GN=Tmem120a PE=1 SV=1	3	5
Vacuolar protein sorting-associated protein 26A OS=Mus musculus GN=Vps26a PE=1 SV=1	3	5
Syntaxin-binding protein 3 OS=Mus musculus GN=Stxbp3 PE=1 SV=1	3	5
Kinesin light chain 1 OS=Mus musculus GN=Klc1 PE=1 SV=1	3	5
Ataxin-2-like protein OS=Mus musculus GN=Atxn2l PE=1 SV=1	3	5
39S ribosomal protein L41, mitochondrial OS=Mus musculus GN=Mrpl41 PE=1 SV=1	3	5
Transcriptional activator protein Pur-alpha OS=Mus musculus GN=Pura PE=1 SV=1	3	5
Syntaxin 5A OS=Mus musculus GN=Stx5a PE=1 SV=1	3	5
Uncharacterized protein (Fragment) OS=Mus musculus GN=Rdx PE=2 SV=1	3	6
Nckap1 protein (Fragment) OS=Mus musculus GN=Nckap1 PE=2 SV=1	3	6
Beta-hexosaminidase subunit alpha OS=Mus musculus GN=Hexa PE=1 SV=2	3	6
Formin-like protein 3 OS=Mus musculus GN=Fmnl3 PE=1 SV=2	3	6
Proteasome subunit alpha type-4 OS=Mus musculus GN=Psma4 PE=1 SV=1	3	6
MCG129810, isoform CRA_c OS=Mus musculus GN=Pdxdc1 PE=1 SV=1	3	6
ATP-binding cassette, sub-family C (CFTR/MRP), member 1 OS=Mus musculus GN=Abcc1 PE=1 SV=1	3	6
Dehydrogenase/reductase SDR family member 7B OS=Mus musculus GN=Dhrs7b PE=1 SV=1	3	6
Ubiquitin associated protein 2-like, isoform CRA_g OS=Mus musculus GN=Ubap2l PE=1 SV=1	3	6
Protein FAM162A OS=Mus musculus GN=Fam162a PE=1 SV=1	3	7
Eukaryotic translation initiation factor 5B OS=Mus musculus GN=Eif5b PE=1 SV=2	3	7
26S proteasome non-ATPase regulatory subunit 12 OS=Mus musculus GN=Psmd12 PE=1 SV=4	3	7
Probable ATP-dependent RNA helicase DDX17 OS=Mus musculus GN=Ddx17 PE=1 SV=1	3	7
Arf-GAP with coiled-coil, ANK repeat and PH domain-containing protein 2 OS=Mus musculus GN=Acap2 PE=1 SV=2	3	7
Uncharacterized protein OS=Mus musculus GN=Dars PE=2 SV=1	3	7
tRNA methyltransferase 10 homolog C OS=Mus musculus GN=Trmt10c PE=1 SV=2	3	7
Heat shock protein 105 kDa OS=Mus musculus GN=Hsph1 PE=1 SV=1	3	8
Peroxisomal acyl-coenzyme A oxidase 1 OS=Mus musculus GN=Acox1 PE=1 SV=5	3	9
Reactive oxygen species modulator 1 OS=Mus musculus GN=Romo1 PE=2 SV=1	2
Uncharacterized protein OS=Mus musculus GN=Srpk1 PE=1 SV=1	2
Ankyrin repeat and LEM domain-containing protein 2 OS=Mus musculus GN=Ankle2 PE=1 SV=2	2
Transmembrane emp24 domain-containing protein 3 OS=Mus musculus GN=Tmed3 PE=1 SV=1	2
39S ribosomal protein L53, mitochondrial OS=Mus musculus GN=Mrpl53 PE=1 SV=1	2
Protein BUD31 homolog OS=Mus musculus GN=Bud31 PE=1 SV=1	2
Proteasome subunit beta type OS=Mus musculus GN=Psmb2 PE=2 SV=1	2
Serine/threonine-protein phosphatase OS=Mus musculus GN=Ppp6c PE=1 SV=1	2
UMP-CMP kinase OS=Mus musculus GN=Cmpk1 PE=1 SV=1	2
28S ribosomal protein S18b, mitochondrial (Fragment) OS=Mus musculus GN=Mrps18b PE=1 SV=1	2
Thioredoxin reductase 2, mitochondrial OS=Mus musculus GN=Txnrd2 PE=1 SV=1	2
Lysosomal acid phosphatase OS=Mus musculus GN=Acp2 PE=1 SV=2	2
Glycerol-3-phosphate dehydrogenase [NAD(+)] OS=Mus musculus GN=Gpd1l PE=2 SV=1	2
Trim47 protein (Fragment) OS=Mus musculus GN=Trim47 PE=2 SV=1	2
NADH dehydrogenase [ubiquinone] iron-sulfur protein 6, mitochondrial OS=Mus musculus GN=Ndufs6 PE=1 SV=2	2
Clustered mitochondria protein homolog OS=Mus musculus GN=Cluh PE=1 SV=1	2
Transmembrane 9 superfamily member OS=Mus musculus GN=Tm9sf2 PE=2 SV=1	2
Beta-1,3-glucosyltransferase OS=Mus musculus GN=B3glct PE=1 SV=3	2
Enoyl-CoA hydratase domain-containing protein 3, mitochondrial OS=Mus musculus GN=Echdc3 PE=1 SV=1	2
Tetraspanin-6 (Fragment) OS=Mus musculus GN=Tspan6 PE=1 SV=8	2
SAP domain-containing ribonucleoprotein OS=Mus musculus GN=Sarnp PE=1 SV=1	2
IgG receptor FcRn large subunit p51 OS=Mus musculus GN=Fcgrt PE=1 SV=1	2
NADH dehydrogenase [ubiquinone] iron-sulfur protein 4, mitochondrial OS=Mus musculus GN=Ndufs4 PE=1 SV=1	2
MCG14259, isoform CRA_b OS=Mus musculus GN=U2af1 PE=1 SV=1	2
Mitochondrial import inner membrane translocase subunit Tim22 OS=Mus musculus GN=Timm22 PE=1 SV=1	2
Glutaminase kidney isoform, mitochondrial (Fragment) OS=Mus musculus GN=Gls PE=1 SV=1	2
Cerebellar degeneration-related protein 2-like OS=Mus musculus GN=Cdr2l PE=2 SV=1	2
Uveal autoantigen with coiled-coil domains and ankyrin repeats OS=Mus musculus GN=Uaca PE=1 SV=1	2
Mapk-regulated corepressor-interacting protein 1 OS=Mus musculus GN=Mcrip1 PE=1 SV=1	2
Vasorin OS=Mus musculus GN=Vasn PE=2 SV=2	2
Importin subunit alpha-7 OS=Mus musculus GN=Kpna6 PE=1 SV=2	2
Keratin, type II cytoskeletal 2 oral OS=Mus musculus GN=Krt76 PE=1 SV=1	2
ADP-ribosylation factor GTPase-activating protein 2 OS=Mus musculus GN=Arfgap2 PE=1 SV=1	2
Fibronectin type-III domain-containing protein 3A (Fragment) OS=Mus musculus GN=Fndc3a PE=1 SV=1	2
Golgi SNAP receptor complex member 2 OS=Mus musculus GN=Gosr2 PE=1 SV=1	2
Carboxypeptidase D OS=Mus musculus GN=Cpd PE=1 SV=2	2
Mitochondrial inner membrane protein OXA1L OS=Mus musculus GN=Oxa1l PE=1 SV=1	2
Pentatricopeptide repeat-containing protein 2, mitochondrial OS=Mus musculus GN=Ptcd2 PE=1 SV=1	2
Methylmalonic aciduria type A homolog, mitochondrial OS=Mus musculus GN=Mmaa PE=1 SV=1	2
39S ribosomal protein L10, mitochondrial OS=Mus musculus GN=Mrpl10 PE=1 SV=2	2
MCG2852, isoform CRA_a OS=Mus musculus GN=Mrpl48 PE=2 SV=1	2
Solute carrier family 39 OS=Mus musculus GN=Slc39a7 PE=1 SV=1	2
3-hydroxybutyrate dehydrogenase type 2 OS=Mus musculus GN=Bdh2 PE=1 SV=1	2
Erlin-1 OS=Mus musculus GN=Erlin1 PE=1 SV=1	2
Keratin 19 OS=Mus musculus GN=Krt19 PE=1 SV=1	2
DNA-directed RNA polymerase OS=Mus musculus GN=Polrmt PE=1 SV=1	2
28S ribosomal protein S15, mitochondrial OS=Mus musculus GN=Mrps15 PE=1 SV=2	2
Tubulin alpha chain (Fragment) OS=Mus musculus GN=Tuba4a PE=1 SV=1	2
Uncharacterized protein OS=Mus musculus GN=Kras PE=2 SV=1	2
Predicted gene 42957 OS=Mus musculus GN=Gm42957 PE=1 SV=1	2
cAMP-dependent protein kinase type II-alpha regulatory subunit OS=Mus musculus GN=Prkar2a PE=1 SV=1	2
CTP synthase 2 OS=Mus musculus GN=Ctps2 PE=1 SV=1	2
Arylsulfatase A OS=Mus musculus GN=Arsa PE=1 SV=2	2
MCG16762, isoform CRA_a OS=Mus musculus GN=Mrps21 PE=1 SV=1	2
Ribonucleoside-diphosphate reductase (Fragment) OS=Mus musculus GN=Rrm1 PE=2 SV=1	2
Peroxisomal membrane protein PEX14 OS=Mus musculus GN=Pex14 PE=1 SV=1	2
Polypeptide N-acetylgalactosaminyltransferase 1 OS=Mus musculus GN=Galnt1 PE=1 SV=1	2
NEDD8-conjugating enzyme Ubc12 (Fragment) OS=Mus musculus GN=Ube2m PE=1 SV=1	2
CTTNBP2 N-terminal-like protein OS=Mus musculus GN=Cttnbp2nl PE=1 SV=1	2
MARCKS-related protein OS=Mus musculus GN=Marcksl1 PE=1 SV=2	2
Dudulin OS=Mus musculus GN=Steap1 PE=2 SV=1	2
tRNA pseudouridine synthase-like 1 OS=Mus musculus GN=Pusl1 PE=1 SV=1	2
Transmembrane protein 237 (Fragment) OS=Mus musculus GN=Tmem237 PE=1 SV=1	2
Aldo-keto reductase family 1, member B10 (aldose reductase) OS=Mus musculus GN=Akr1b10 PE=1 SV=1	2
NADH dehydrogenase OS=Mus musculus GN=Ndufa7 PE=2 SV=1	2
Synaptosomal-associated protein 29 OS=Mus musculus GN=Snap29 PE=1 SV=1	2
Arylsulfatase B OS=Mus musculus GN=Arsb PE=1 SV=1	2
Zinc transporter 7 OS=Mus musculus GN=Slc30a7 PE=1 SV=1	2
Peptidyl-prolyl cis-trans isomerase NIMA-interacting 1 OS=Mus musculus GN=Pin1 PE=1 SV=1	2
Uncharacterized protein OS=Mus musculus GN=Wipf1 PE=2 SV=1	2
TROVE domain family, member 2 OS=Mus musculus GN=Trove2 PE=1 SV=1	2
EGF-containing fibulin-like extracellular matrix protein 2 OS=Mus musculus GN=Efemp2 PE=1 SV=1	2
Growth arrest and DNA damage-inducible proteins-interacting protein 1 OS=Mus musculus GN=Gadd45gip1 PE=1 SV=1	2
Predicted gene 20498 OS=Mus musculus GN=Gm20498 PE=1 SV=1	2
tRNA pseudouridine synthase OS=Mus musculus GN=Pus1 PE=1 SV=1	2
Dystrobrevin OS=Mus musculus GN=Dtna PE=2 SV=1	2
Mitochondrial RNA pseudouridine synthase Rpusd4 OS=Mus musculus GN=Rpusd4 PE=2 SV=1	2
Endoribonuclease LACTB2 OS=Mus musculus GN=Lactb2 PE=1 SV=1	2
LanC-like protein 2 (Fragment) OS=Mus musculus GN=Lancl2 PE=1 SV=1	2
Alpha-N-acetylgalactosaminidase OS=Mus musculus GN=Naga PE=1 SV=2	2
Transcription factor 25 OS=Mus musculus GN=Tcf25 PE=1 SV=1	2
Bcl-2-like protein 1 (Fragment) OS=Mus musculus GN=Bcl2l1 PE=1 SV=1	2
Ubiquinone biosynthesis O-methyltransferase, mitochondrial OS=Mus musculus GN=Coq3 PE=1 SV=1	2
Growth factor receptor bound protein 14 OS=Mus musculus GN=Grb14 PE=1 SV=1	2
Glycosaminoglycan xylosylkinase OS=Mus musculus GN=Fam20b PE=1 SV=1	2
Small nuclear ribonucleoprotein D3 OS=Mus musculus GN=Snrpd3 PE=2 SV=1	2
Solute carrier family 25 member 33 OS=Mus musculus GN=Slc25a33 PE=2 SV=1	2
Jupiter microtubule associated homolog 2 OS=Mus musculus GN=Jpt2 PE=1 SV=1	2
Retinol dehydrogenase 14 (All-trans and 9-cis) OS=Mus musculus GN=Rdh14 PE=2 SV=1	2
Uncharacterized protein OS=Mus musculus GN=Ppfia1 PE=2 SV=1	2
Alpha-(1,3)-fucosyltransferase OS=Mus musculus GN=Fut11 PE=1 SV=1	2
Keratin, type II cytoskeletal 75 OS=Mus musculus GN=Krt75 PE=1 SV=1	2
Protein phosphatase 1G OS=Mus musculus GN=Ppm1g PE=1 SV=1	2
Hsp90 co-chaperone Cdc37 OS=Mus musculus GN=Cdc37 PE=1 SV=1	2
COP9 signalosome complex subunit 1 OS=Mus musculus GN=Gps1 PE=1 SV=1	2
Neuropilin-2 OS=Mus musculus GN=Nrp2 PE=1 SV=2	2
Uncharacterized protein OS=Mus musculus GN=Nsun2 PE=2 SV=1	2
Alpha-galactosidase A OS=Mus musculus GN=Gla PE=1 SV=1	2
Cytochrome c oxidase subunit 5A, mitochondrial OS=Mus musculus GN=Cox5a PE=1 SV=2	2
Rab GTPase-activating protein 1 (Fragment) OS=Mus musculus GN=Rabgap1 PE=1 SV=1	2
1-phosphatidylinositol 4,5-bisphosphate phosphodiesterase beta-3 OS=Mus musculus GN=Plcb3 PE=1 SV=2	2
Protein FAM173A OS=Mus musculus GN=Fam173a PE=1 SV=1	2
NADH dehydrogenase [ubiquinone] 1 beta subcomplex subunit 7 OS=Mus musculus GN=Ndufb7 PE=1 SV=3	2
Choline-phosphate cytidylyltransferase A OS=Mus musculus GN=Pcyt1a PE=1 SV=1	2
DnaJ homolog subfamily C member 8 OS=Mus musculus GN=Dnajc8 PE=1 SV=1	2
Adrenodoxin, mitochondrial OS=Mus musculus GN=Fdx1 PE=1 SV=1	2
Ankyrin-2 OS=Mus musculus GN=Ank2 PE=1 SV=2	2
Uncharacterized protein OS=Mus musculus GN=Ston1 PE=2 SV=1	2
Acyl-CoA synthetase family member 3, mitochondrial OS=Mus musculus GN=Acsf3 PE=1 SV=1	2
Integral membrane protein 2B OS=Mus musculus GN=Itm2b PE=1 SV=1	2
Nuclear autoantigenic sperm protein OS=Mus musculus GN=Nasp PE=1 SV=1	2
39S ribosomal protein L34, mitochondrial OS=Mus musculus GN=Mrpl34 PE=1 SV=1	2
Nuclear transcription factor, X-box-binding-like 1 OS=Mus musculus GN=Nfxl1 PE=1 SV=1	2
Transporter 1 ATP-binding cassette sub-family B OS=Mus musculus GN=Tap1 PE=2 SV=1	2
Protein Niban OS=Mus musculus GN=Fam129a PE=1 SV=1	2
Phosphoenolpyruvate carboxykinase [GTP], mitochondrial OS=Mus musculus GN=Pck2 PE=1 SV=1	2
28S ribosomal protein S18a, mitochondrial OS=Mus musculus GN=Mrps18a PE=1 SV=1	2
Unconventional myosin-IXb OS=Mus musculus GN=Myo9b PE=1 SV=1	2
Apoptosis-inducing factor 2 OS=Mus musculus GN=Aifm2 PE=1 SV=1	2
MKIAA0971 protein (Fragment) OS=Mus musculus GN=mKIAA0971 PE=4 SV=1	2
Fibrillin-1 OS=Mus musculus GN=Fbn1 PE=1 SV=2	2
Receptor protein-tyrosine kinase (Fragment) OS=Mus musculus GN=Axl PE=2 SV=1	2
Spastin OS=Mus musculus GN=Spast PE=1 SV=1	2
Sphingomyelin phosphodiesterase 4 OS=Mus musculus GN=Smpd4 PE=1 SV=1	2
28S ribosomal protein S14, mitochondrial OS=Mus musculus GN=Mrps14 PE=1 SV=1	2
Selenoprotein N OS=Mus musculus GN=Selenon PE=3 SV=2	2
Xyloside xylosyltransferase 1 OS=Mus musculus GN=Xxylt1 PE=1 SV=2	2
Peptide deformylase OS=Mus musculus GN=Pdf PE=1 SV=1	2
ADP-ribosylation factor-like protein 2 OS=Mus musculus GN=Arl2 PE=1 SV=1	2
Endothelial differentiation-related factor 1 OS=Mus musculus GN=Edf1 PE=1 SV=1	2
Snx4 protein OS=Mus musculus PE=2 SV=1	2
Splicing factor 1 (Fragment) OS=Mus musculus GN=Sf1 PE=1 SV=1	2
Solute carrier family 25 member 46 OS=Mus musculus GN=Slc25a46 PE=1 SV=1	2
EGF domain-specific O-linked N-acetylglucosamine transferase OS=Mus musculus GN=Eogt PE=1 SV=1	2
Mitochondrial chaperone BCS1 OS=Mus musculus GN=Bcs1l PE=1 SV=1	2
Focal adhesion kinase 1 OS=Mus musculus GN=Ptk2 PE=1 SV=3	2
Serine/threonine-protein kinase N2 OS=Mus musculus GN=Pkn2 PE=1 SV=1	2
Uncharacterized protein OS=Mus musculus GN=Slc27a1 PE=2 SV=1	2
Calpain-5 OS=Mus musculus GN=Capn5 PE=1 SV=1	2
Anthrax toxin receptor 1 OS=Mus musculus GN=Antxr1 PE=1 SV=1	2
RIKEN cDNA 0610012G03 gene OS=Mus musculus GN=0610012G03Rik PE=1 SV=1	2
MCG55337 OS=Mus musculus GN=Jcad PE=1 SV=1	2
Dehydrogenase/reductase SDR family member 13 OS=Mus musculus GN=Dhrs13 PE=1 SV=1	2
Krt78 protein (Fragment) OS=Mus musculus GN=Krt78 PE=2 SV=1	2	2
S100 calcium binding protein A10 (Calpactin), isoform CRA_a OS=Mus musculus GN=S100a10 PE=1 SV=1	2	2
Uncharacterized protein OS=Mus musculus GN=Actb PE=2 SV=1	2	2
Tubulin alpha-1B chain OS=Mus musculus GN=Tuba1b PE=1 SV=2	2	2
ATP synthase subunit f, mitochondrial OS=Mus musculus GN=Atp5j2 PE=1 SV=3	2	2
Oligoribonuclease, mitochondrial OS=Mus musculus GN=Rexo2 PE=1 SV=2	2	2
40S ribosomal protein S26 OS=Mus musculus GN=Rps26 PE=1 SV=1	2	2
40S ribosomal protein S30 OS=Mus musculus PE=2 SV=1	2	2
40S ribosomal protein S29 OS=Mus musculus GN=Rps29 PE=3 SV=2	2	2
Tyrosine-protein phosphatase non-receptor type 11 OS=Mus musculus GN=Ptpn11 PE=1 SV=2	2	2
Inositol monophosphatase 3 OS=Mus musculus GN=Impad1 PE=1 SV=1	2	2
Succinate dehydrogenase cytochrome b560 subunit, mitochondrial OS=Mus musculus GN=Sdhc PE=1 SV=1	2	2
Epididymal secretory protein E1 OS=Mus musculus GN=Npc2 PE=1 SV=1	2	2
Basic leucine zipper and W2 domain-containing protein 1 OS=Mus musculus GN=Bzw1 PE=1 SV=1	2	2
RAB5B, member RAS oncogene family OS=Mus musculus GN=Rab5b PE=1 SV=1	2	2
MCG10168 OS=Mus musculus GN=Rplp1 PE=1 SV=1	2	2
Phosphatidate cytidylyltransferase OS=Mus musculus GN=Cds2 PE=1 SV=1	2	2
Glycosylphosphatidylinositol anchor attachment 1 protein OS=Mus musculus GN=Gpaa1 PE=1 SV=3	2	2
Tctex-1 OS=Mus musculus PE=2 SV=1	2	2
Probable UDP-sugar transporter protein SLC35A4 OS=Mus musculus GN=Slc35a4 PE=1 SV=1	2	2
Inosine-5'-monophosphate dehydrogenase 2 OS=Mus musculus GN=Impdh2 PE=1 SV=2	2	2
Anthrax toxin receptor 2 OS=Mus musculus GN=Antxr2 PE=1 SV=1	2	2
Cytochrome c oxidase assembly factor 6 homolog OS=Mus musculus GN=Coa6 PE=1 SV=1	2	2
Tissue factor OS=Mus musculus GN=F3 PE=1 SV=1	2	2
MCG16976, isoform CRA_c OS=Mus musculus GN=Rpl22l1 PE=2 SV=1	2	2
Translationally-controlled tumor protein OS=Mus musculus GN=Tpt1 PE=1 SV=1	2	2
Mitochondrial import inner membrane translocase subunit Tim29 OS=Mus musculus GN=Timm29 PE=1 SV=1	2	2
TATA-box-binding protein-associated factor 15 (Fragment) OS=Mus musculus GN=Taf15 PE=1 SV=1	2	2
Interferon-induced transmembrane protein 3 OS=Mus musculus GN=Ifitm3 PE=1 SV=1	2	2
40S ribosomal protein S27-like OS=Mus musculus GN=Rps27l PE=1 SV=3	2	2
2-oxoisovalerate dehydrogenase subunit beta, mitochondrial OS=Mus musculus GN=Bckdhb PE=1 SV=2	2	2
Keratin, type II cytoskeletal 1b OS=Mus musculus GN=Krt77 PE=1 SV=1	2	2
UDP-glucuronic acid decarboxylase 1 OS=Mus musculus GN=Uxs1 PE=1 SV=1	2	2
Gag OS=Mus musculus GN=gag PE=2 SV=1	2	2
TAR DNA-binding protein 43 (Fragment) OS=Mus musculus GN=Tardbp PE=1 SV=1	2	2
Ras-related protein Rab-5A OS=Mus musculus GN=Rab5a PE=1 SV=1	2	2
Sulfatase-modifying factor 1 OS=Mus musculus GN=Sumf1 PE=1 SV=1	2	2
Microsomal glutathione S-transferase 1 OS=Mus musculus GN=Mgst1 PE=1 SV=1	2	2
H-2K-sm1 OS=Mus musculus GN=H2-K1 PE=2 SV=1	2	2
NADH dehydrogenase [ubiquinone] iron-sulfur protein 8, mitochondrial OS=Mus musculus GN=Ndufs8 PE=1 SV=1	2	2
28S ribosomal protein S28, mitochondrial OS=Mus musculus GN=Mrps28 PE=1 SV=1	2	2
Mitochondrial fission 1 protein OS=Mus musculus GN=Fis1 PE=1 SV=1	2	2
Pyrroline-5-carboxylate reductase 3 OS=Mus musculus GN=Pycr3 PE=1 SV=2	2	2
Solute carrier family 2, facilitated glucose transporter member 1 OS=Mus musculus GN=Slc2a1 PE=1 SV=4	2	2
Sarcolemmal membrane-associated protein OS=Mus musculus GN=Slmap PE=1 SV=1	2	2
GH3 domain-containing protein OS=Mus musculus GN=Ghdc PE=2 SV=2	2	2
V-type proton ATPase subunit a OS=Mus musculus GN=Atp6v0a1 PE=1 SV=1	2	2
N-acetylgalactosaminyltransferase 7 OS=Mus musculus GN=Galnt7 PE=1 SV=2	2	2
Uncharacterized protein OS=Mus musculus GN=Hnrnpl PE=2 SV=1	2	2
Membrane protein, palmitoylated 6 (MAGUK p55 subfamily member 6) OS=Mus musculus GN=Mpp6 PE=2 SV=1	2	2
Molybdenum cofactor biosynthesis protein 1 OS=Mus musculus GN=Mocs1 PE=1 SV=2	2	2
Growth hormone-inducible transmembrane protein OS=Mus musculus GN=Ghitm PE=1 SV=1	2	2
FAD-linked sulfhydryl oxidase ALR OS=Mus musculus GN=Gfer PE=1 SV=2	2	2
Kynurenine--oxoglutarate transaminase 3 OS=Mus musculus GN=Kyat3 PE=1 SV=1	2	2
Lysyl oxidase homolog 1 OS=Mus musculus GN=Loxl1 PE=1 SV=1	2	2
Uncharacterized protein (Fragment) OS=Mus musculus GN=Rbms1 PE=2 SV=1	2	2
Cytochrome c oxidase subunit 7A-related protein, mitochondrial OS=Mus musculus GN=Cox7a2l PE=1 SV=1	2	2
Multiple inositol polyphosphate phosphatase 1 OS=Mus musculus GN=Minpp1 PE=1 SV=3	2	2
Dimethyladenosine transferase 1, mitochondrial OS=Mus musculus GN=Tfb1m PE=1 SV=1	2	2
Uncharacterized protein OS=Mus musculus GN=Tfg PE=2 SV=1	2	2
Bax inhibitor 1 OS=Mus musculus GN=Tmbim6 PE=1 SV=1	2	2
Eukaryotic translation initiation factor 3 subunit H OS=Mus musculus GN=Eif3h PE=1 SV=1	2	2
SCY1-like 1 splice variant 13 OS=Mus musculus GN=Scyl1 PE=2 SV=1	2	2
Alcohol dehydrogenase class-3 OS=Mus musculus GN=Adh5 PE=1 SV=3	2	2
ADP-ribosylation factor-like protein 6 OS=Mus musculus GN=Arl6 PE=1 SV=1	2	2
MCG10089 OS=Mus musculus GN=Tomm20 PE=1 SV=1	2	2
Spermatogenesis-associated serine-rich protein 2 OS=Mus musculus GN=Spats2 PE=1 SV=1	2	2
Annexin A11 OS=Mus musculus GN=Anxa11 PE=1 SV=2	2	2
Ceramide synthase 2 OS=Mus musculus GN=Cers2 PE=1 SV=1	2	2
Ras-related GTP-binding protein C OS=Mus musculus GN=Rragc PE=1 SV=1	2	2
Transmembrane protein 65 OS=Mus musculus GN=Tmem65 PE=1 SV=1	2	2
CD276 antigen OS=Mus musculus GN=Cd276 PE=2 SV=1	2	2
Uncharacterized protein (Fragment) OS=Mus musculus GN=Fxr2 PE=2 SV=1	2	2
Coiled-coil domain-containing protein 167 OS=Mus musculus GN=Ccdc167 PE=1 SV=2	2	2
ATP synthase subunit delta, mitochondrial OS=Mus musculus GN=Atp5d PE=1 SV=1	2	2
Arf-GAP domain and FG repeat-containing protein 1 OS=Mus musculus GN=Agfg1 PE=1 SV=1	2	2
High affinity cationic amino acid transporter 1 OS=Mus musculus GN=Slc7a1 PE=1 SV=1	2	2
Amino acid transporter OS=Mus musculus GN=Slc1a4 PE=2 SV=1	2	2
Vesicle transport protein GOT1B OS=Mus musculus GN=Golt1b PE=1 SV=1	2	2
Cleft lip and palate transmembrane protein 1-like protein OS=Mus musculus GN=Clptm1l PE=1 SV=1	2	2
Endophilin-B1 OS=Mus musculus GN=Sh3glb1 PE=1 SV=1	2	2
Mycophenolic acid acyl-glucuronide esterase, mitochondrial OS=Mus musculus GN=Abhd10 PE=1 SV=1	2	2
TBC1 domain family member 15 OS=Mus musculus GN=Tbc1d15 PE=2 SV=1	2	2
40S ribosomal protein S28 (Fragment) OS=Mus musculus GN=Rps28 PE=1 SV=1	2	2
Alpha-parvin OS=Mus musculus GN=Parva PE=1 SV=1	2	2
LEM domain-containing protein 2 OS=Mus musculus GN=Lemd2 PE=1 SV=1	2	2
Uncharacterized protein OS=Mus musculus GN=Txnl1 PE=2 SV=1	2	2
Epidermal growth factor receptor substrate 15-like 1 OS=Mus musculus GN=Eps15l1 PE=1 SV=1	2	2
DENN domain-containing protein 4C OS=Mus musculus GN=Dennd4c PE=1 SV=1	2	2
Mannosyltransferase IV(V) OS=Mus musculus GN=Alg11 PE=2 SV=1	2	2
Proteasome subunit alpha type-5 OS=Mus musculus GN=Psma5 PE=1 SV=1	2	2
Basement membrane-specific heparan sulfate proteoglycan core protein OS=Mus musculus GN=Hspg2 PE=1 SV=1	2	2
RHEB-like protein OS=Mus musculus GN=Rheb PE=1 SV=1	2	2
Rap1A-retro1 OS=Mus musculus GN=Gm9392 PE=2 SV=1	2	2
AP-1 complex subunit sigma-1A OS=Mus musculus GN=Ap1s1 PE=1 SV=1	2	2
Bcl-2 homologous antagonist/killer OS=Mus musculus GN=Bak1 PE=1 SV=3	2	2
Sodium/hydrogen exchanger OS=Mus musculus GN=Slc9a1 PE=2 SV=1	2	2
AP-1 complex subunit mu-1 OS=Mus musculus GN=Ap1m1 PE=1 SV=3	2	2
COX assembly mitochondrial protein homolog OS=Mus musculus GN=Cmc1 PE=1 SV=1	2	2
Cysteine and histidine-rich domain-containing protein 1 OS=Mus musculus GN=Chordc1 PE=1 SV=1	2	2
Synaptosomal-associated protein 47 OS=Mus musculus GN=Snap47 PE=1 SV=1	2	2
Keratin, type I cytoskeletal 13 OS=Mus musculus GN=Krt13 PE=1 SV=2	2	2
O-acyltransferase OS=Mus musculus GN=Soat1 PE=2 SV=1	2	2
Selenoprotein F OS=Mus musculus GN=Selenof PE=1 SV=1	2	2
Fibroblast growth factor receptor 1 OS=Mus musculus GN=Fgfr1 PE=1 SV=2	2	2
TBC1 domain family member 10A OS=Mus musculus GN=Tbc1d10a PE=1 SV=1	2	2
NADH dehydrogenase (Ubiquinone) 1 beta subcomplex, 5, isoform CRA_e OS=Mus musculus GN=Ndufb5 PE=1 SV=1	2	2
Tubulin gamma chain OS=Mus musculus GN=Tubg1 PE=1 SV=1	2	2
Uncharacterized protein C6orf203 homolog OS=Mus musculus PE=1 SV=1	2	2
Ras GTPase-activating protein-binding protein 2 OS=Mus musculus GN=G3bp2 PE=1 SV=2	2	2
Serine/threonine-protein kinase OSR1 OS=Mus musculus GN=Oxsr1 PE=1 SV=1	2	2
Phosphatidate cytidylyltransferase, mitochondrial OS=Mus musculus GN=Tamm41 PE=1 SV=1	2	2
Palmitoyl-protein thioesterase 1 OS=Mus musculus GN=Ppt1 PE=1 SV=2	2	2
Irgm1 OS=Mus musculus GN=OTTMUSPWKG00059374 PE=4 SV=1	2	2
Tetratricopeptide repeat domain 7 OS=Mus musculus GN=Ttc7 PE=1 SV=1	2	2
Peptidyl-prolyl cis-trans isomerase FKBP14 OS=Mus musculus GN=Fkbp14 PE=1 SV=1	2	2
Uncharacterized protein OS=Mus musculus GN=Srsf2 PE=2 SV=1	2	2
Dual-specificity protein phosphatase 3 OS=Mus musculus GN=Dusp3 PE=1 SV=1	2	2
SURF1-like protein (Fragment) OS=Mus musculus GN=Surf1 PE=1 SV=1	2	2
Guanine monphosphate synthetase OS=Mus musculus GN=Gmps PE=1 SV=1	2	2
Death-associated protein kinase 3 OS=Mus musculus GN=Dapk3 PE=1 SV=1	2	2
Microtubule-associated proteins 1A/1B light chain 3B OS=Mus musculus GN=Map1lc3b PE=1 SV=3	2	2
Fatty acid desaturase splice variant OS=Mus musculus GN=Fads3 PE=2 SV=1	2	2
Transmembrane protein 11, mitochondrial OS=Mus musculus GN=Tmem11 PE=1 SV=1	2	2
Ubiquitin carboxyl-terminal hydrolase 30 OS=Mus musculus GN=Usp30 PE=1 SV=1	2	2
Beta-2-microglobulin OS=Mus musculus GN=B2m PE=1 SV=2	2	2
Methionine aminopeptidase 1D, mitochondrial OS=Mus musculus GN=Metap1d PE=2 SV=1	2	2
Thioredoxin domain-containing protein 15 OS=Mus musculus GN=Txndc15 PE=1 SV=1	2	2
Pumilio homolog 1 OS=Mus musculus GN=Pum1 PE=1 SV=2	2	2
PC4 and SFRS1-interacting protein OS=Mus musculus GN=Psip1 PE=1 SV=1	2	2
Saccharopine dehydrogenase-like oxidoreductase OS=Mus musculus GN=Sccpdh PE=1 SV=1	2	2
Scavenger receptor class B member 1 OS=Mus musculus GN=Scarb1 PE=1 SV=1	2	2
Uncharacterized protein OS=Mus musculus GN=Sptlc1 PE=2 SV=1	2	2
Bone morphogenetic protein receptor type-2 OS=Mus musculus GN=Bmpr2 PE=1 SV=1	2	2
MCG17902, isoform CRA_a OS=Mus musculus GN=Srsf7 PE=2 SV=1	2	2
Protein MEMO1 OS=Mus musculus GN=Memo1 PE=1 SV=1	2	2
Uncharacterized protein OS=Mus musculus GN=Calu PE=2 SV=1	2	2
Choline/ethanolaminephosphotransferase 1 (Fragment) OS=Mus musculus GN=Cept1 PE=1 SV=1	2	2
Antileukoproteinase OS=Mus musculus GN=Slpi PE=1 SV=1	2	3
Cleft lip and palate transmembrane protein 1 homolog OS=Mus musculus GN=Clptm1 PE=1 SV=1	2	3
Ras-related protein R-Ras2 OS=Mus musculus GN=Rras2 PE=1 SV=1	2	3
Importin-9 OS=Mus musculus GN=Ipo9 PE=1 SV=1	2	3
MCG130675 OS=Mus musculus GN=Zbed5 PE=2 SV=1	2	3
28S ribosomal protein S2, mitochondrial OS=Mus musculus GN=Mrps2 PE=1 SV=1	2	3
Calcium load-activated calcium channel (Fragment) OS=Mus musculus GN=Tmco1 PE=1 SV=1	2	3
Ectonucleotide pyrophosphatase/phosphodiesterase family member 3 OS=Mus musculus GN=Enpp3 PE=1 SV=2	2	3
Tetraspanin (Fragment) OS=Mus musculus GN=Cd63 PE=1 SV=1	2	3
UPF0598 protein C8orf82 homolog OS=Mus musculus PE=1 SV=1	2	3
Rho GTPase-activating protein 10 OS=Mus musculus GN=Arhgap10 PE=1 SV=2	2	3
Chitinase domain-containing protein 1 OS=Mus musculus GN=Chid1 PE=1 SV=1	2	3
NADH dehydrogenase [ubiquinone] 1 alpha subcomplex subunit 12 OS=Mus musculus GN=Ndufa12 PE=1 SV=1	2	3
Calcineurin B homologous protein 1 OS=Mus musculus GN=Chp1 PE=1 SV=1	2	3
Armadillo repeat-containing protein 10 OS=Mus musculus GN=Armc10 PE=1 SV=1	2	3
Double-stranded RNA-binding protein Staufen homolog 1 OS=Mus musculus GN=Stau1 PE=1 SV=1	2	3
Protein FAM234A OS=Mus musculus GN=Fam234a PE=1 SV=1	2	3
Uncharacterized protein OS=Mus musculus GN=Pvr PE=2 SV=1	2	3
26S proteasome regulatory subunit 4 OS=Mus musculus GN=Psmc1 PE=1 SV=1	2	3
Niemann-Pick C1 protein OS=Mus musculus GN=Npc1 PE=1 SV=2	2	3
Serine/arginine-rich-splicing factor 1 OS=Mus musculus GN=Srsf1 PE=1 SV=1	2	3
MCG21131, isoform CRA_a OS=Mus musculus GN=Srsf3 PE=2 SV=1	2	3
MFLJ00023 protein (Fragment) OS=Mus musculus GN=Mrps25 PE=2 SV=1	2	3
FUN14 domain-containing protein 2 OS=Mus musculus GN=Fundc2 PE=1 SV=1	2	3
Uncharacterized protein OS=Mus musculus GN=Stx12 PE=2 SV=1	2	3
ELAV-like protein 1 OS=Mus musculus GN=Elavl1 PE=1 SV=2	2	3
Centromere/kinetochore protein zw10 homolog OS=Mus musculus GN=Zw10 PE=1 SV=3	2	3
Uncharacterized protein (Fragment) OS=Mus musculus GN=Rftn1 PE=2 SV=1	2	3
Peptidyl-prolyl cis-trans isomerase FKBP4 OS=Mus musculus GN=Fkbp4 PE=1 SV=5	2	3
LIM and SH3 domain protein 1 OS=Mus musculus GN=Lasp1 PE=1 SV=1	2	3
Protein Hook homolog 3 OS=Mus musculus GN=Hook3 PE=1 SV=2	2	3
Uncharacterized protein OS=Mus musculus GN=Clint1 PE=2 SV=1	2	3
MCG2960, isoform CRA_b OS=Mus musculus GN=Steap2 PE=1 SV=1	2	3
PDZ and LIM domain protein 1 OS=Mus musculus GN=Pdlim1 PE=1 SV=4	2	3
Coiled-coil domain-containing protein 22 OS=Mus musculus GN=Ccdc22 PE=1 SV=1	2	3
Cytochrome c oxidase assembly protein COX15 homolog OS=Mus musculus GN=Cox15 PE=1 SV=1	2	3
Ras homolog gene family, member B OS=Mus musculus GN=Rhob PE=1 SV=1	2	3
Serine/threonine-protein kinase Nek7 OS=Mus musculus GN=Nek7 PE=1 SV=1	2	3
Mitochondrial import inner membrane translocase subunit TIM23 OS=Mus musculus GN=Gm10273 PE=1 SV=1	2	3
Uncharacterized protein OS=Mus musculus GN=Srm PE=2 SV=1	2	3
Lysophosphatidylcholine acyltransferase 1 OS=Mus musculus GN=Lpcat1 PE=1 SV=1	2	3
Proliferating cell nuclear antigen OS=Mus musculus GN=Pcna-ps2 PE=3 SV=1	2	3
Interleukin-6 signal transductor OS=Mus musculus GN=il6st PE=4 SV=1	2	3
Nuclear export mediator factor Nemf OS=Mus musculus GN=Nemf PE=1 SV=2	2	3
Naglu OS=Mus musculus GN=Naglu PE=2 SV=1	2	3
Uncharacterized protein OS=Mus musculus GN=Rab10 PE=2 SV=1	2	3
High mobility group protein B2 OS=Mus musculus GN=Hmgb2 PE=1 SV=3	2	3
Clathrin light chain OS=Mus musculus GN=Cltb PE=2 SV=1	2	3
Eukaryotic translation initiation factor 6 OS=Mus musculus GN=Eif6 PE=1 SV=2	2	3
Tudor and KH domain-containing protein OS=Mus musculus GN=Tdrkh PE=1 SV=1	2	3
Scr3 OS=Mus musculus GN=Rbms2 PE=2 SV=1	2	3
Alpha-1,6-mannosyl-glycoprotein 2-beta-N-acetylglucosaminyltransferase OS=Mus musculus GN=Mgat2 PE=1 SV=1	2	3
MCG140066 OS=Mus musculus GN=Rtraf PE=1 SV=1	2	3
Enhancer of mRNA-decapping protein 4 OS=Mus musculus GN=Edc4 PE=1 SV=1	2	3
FAST kinase domain-containing protein 5, mitochondrial OS=Mus musculus GN=Fastkd5 PE=1 SV=1	2	3
mRNA export factor (Fragment) OS=Mus musculus GN=Rae1 PE=1 SV=1	2	3
Glycerol kinase OS=Mus musculus GN=Gk PE=1 SV=1	2	3
Sorbs3 protein OS=Mus musculus GN=Sorbs3 PE=2 SV=1	2	3
UbiE1 OS=Mus musculus GN=Mettl7a1 PE=2 SV=1	2	3
Motile sperm domain-containing protein 2 OS=Mus musculus GN=Mospd2 PE=1 SV=1	2	3
Transcription elongation factor, mitochondrial OS=Mus musculus GN=Tefm PE=1 SV=1	2	3
E3 SUMO-protein ligase RanBP2 OS=Mus musculus GN=Ranbp2 PE=1 SV=2	2	3
La-related protein 1 OS=Mus musculus GN=Larp1 PE=1 SV=3	2	3
UTP--glucose-1-phosphate uridylyltransferase OS=Mus musculus GN=Ugp2 PE=2 SV=1	2	3
2-iminobutanoate/2-iminopropanoate deaminase OS=Mus musculus GN=Rida PE=1 SV=3	2	3
Heterogeneous nuclear ribonucleoprotein A0 OS=Mus musculus GN=Hnrnpa0 PE=1 SV=1	2	3
Ataxin-2 OS=Mus musculus GN=Atxn2 PE=1 SV=1	2	3
Golgin subfamily A member 2 OS=Mus musculus GN=Golga2 PE=1 SV=1	2	3
Piezo-type mechanosensitive ion channel component OS=Mus musculus GN=Piezo1 PE=1 SV=1	2	3
COP9 signalosome complex subunit 3 OS=Mus musculus GN=Cops3 PE=1 SV=3	2	3
PDZ domain-containing protein 8 OS=Mus musculus GN=Pdzd8 PE=2 SV=1	2	3
Cyclin-like protein 3 OS=Mus musculus GN=Cnnm3 PE=2 SV=1	2	3
Lactoylglutathione lyase OS=Mus musculus GN=Glo1 PE=1 SV=1	2	3
Transcription termination factor 1a, mitochondrial OS=Mus musculus GN=Mterf1a PE=2 SV=1	2	3
E3 ubiquitin-protein ligase TM129 OS=Mus musculus GN=Tmem129 PE=2 SV=1	2	3
Probable ATP-dependent RNA helicase DDX28 OS=Mus musculus GN=Ddx28 PE=2 SV=2	2	3
Glutaredoxin-3 OS=Mus musculus GN=Glrx3 PE=1 SV=1	2	3
26S proteasome non-ATPase regulatory subunit 14 OS=Mus musculus GN=Psmd14 PE=1 SV=2	2	3
Aflatoxin B1 aldehyde reductase member 2 OS=Mus musculus GN=Akr7a2 PE=1 SV=3	2	3
MCG4297 OS=Mus musculus GN=Ube2n PE=1 SV=1	2	3
Insulin-degrading enzyme (Fragment) OS=Mus musculus GN=Ide PE=1 SV=1	2	3
MCG123182 OS=Mus musculus GN=Tsg101 PE=1 SV=1	2	3
Sorcin OS=Mus musculus GN=Sri PE=1 SV=1	2	3
Antithrombin-III OS=Mus musculus GN=Serpinc1 PE=1 SV=1	2	3
Metaxin-1 OS=Mus musculus GN=Mtx1 PE=1 SV=1	2	4
Transmembrane emp24 protein transport domain containing 5 OS=Mus musculus GN=Tmed5 PE=1 SV=1	2	4
Microtubule-associated protein 6 OS=Mus musculus GN=Map6 PE=1 SV=1	2	4
V-type proton ATPase subunit E 1 OS=Mus musculus GN=Atp6v1e1 PE=1 SV=2	2	4
Pyridoxal phosphate homeostasis protein (Fragment) OS=Mus musculus GN=Plpbp PE=1 SV=1	2	4
Ezrin OS=Mus musculus GN=Ezr PE=1 SV=3	2	4
Destrin OS=Mus musculus GN=Dstn PE=1 SV=3	2	4
Sphingosine-1-phosphate phosphatase 1, isoform CRA_a OS=Mus musculus GN=Sgpp1 PE=1 SV=1	2	4
Choline transporter-like protein 1 OS=Mus musculus GN=Slc44a1 PE=1 SV=1	2	4
NADH dehydrogenase [ubiquinone] 1 alpha subcomplex subunit 2 OS=Mus musculus GN=Ndufa2 PE=1 SV=3	2	4
Engulfment and cell motility protein 2 OS=Mus musculus GN=Elmo2 PE=1 SV=1	2	4
DnaJ homolog subfamily B member 1 OS=Mus musculus GN=Dnajb1 PE=1 SV=3	2	4
Nicastrin OS=Mus musculus GN=Ncstn PE=1 SV=3	2	4
Transportin-1 (Fragment) OS=Mus musculus GN=Tnpo1 PE=1 SV=1	2	4
Abl interactor 1 OS=Mus musculus GN=Abi1 PE=1 SV=3	2	4
Ras-related protein Rab-12 OS=Mus musculus GN=Rab12 PE=1 SV=1	2	4
Beta-galactosidase OS=Mus musculus GN=Glb1 PE=1 SV=1	2	4
S-adenosyl-L-methionine-dependent tRNA 4-demethylwyosine synthase OS=Mus musculus GN=Tyw1 PE=1 SV=1	2	4
Rho GTPase-activating protein 1 OS=Mus musculus GN=Arhgap1 PE=1 SV=1	2	4
Proteasome subunit beta type-6 OS=Mus musculus GN=Psmb6 PE=1 SV=3	2	4
ADP-ribosylation factor 4 OS=Mus musculus GN=Arf4 PE=1 SV=2	2	4
Transmembrane emp24 domain-containing protein 4 OS=Mus musculus GN=Tmed4 PE=1 SV=1	2	4
Transcription elongation factor A protein 1 OS=Mus musculus GN=Tcea1 PE=1 SV=1	2	4
Cytoplasmic dynein 1 light intermediate chain 2 OS=Mus musculus GN=Dync1li2 PE=1 SV=2	2	4
Complex I intermediate-associated protein 30, mitochondrial OS=Mus musculus GN=Ndufaf1 PE=1 SV=1	2	4
Tubulin--tyrosine ligase-like protein 12 OS=Mus musculus GN=Ttll12 PE=1 SV=1	2	4
Histone-binding protein RBBP4 OS=Mus musculus GN=Rbbp4 PE=1 SV=5	2	4
AP-2 complex subunit sigma OS=Mus musculus GN=Ap2s1 PE=1 SV=1	2	4
Signal peptidase complex subunit 3 OS=Mus musculus GN=Spcs3 PE=1 SV=1	2	4
Eukaryotic translation initiation factor 1b (Fragment) OS=Mus musculus GN=Eif1b PE=1 SV=1	2	4
Ubiquitin-conjugating enzyme E2 K OS=Mus musculus GN=Ube2k PE=1 SV=1	2	4
Uncharacterized protein OS=Mus musculus GN=Wars PE=2 SV=1	2	5
Nucleotide exchange factor SIL1 OS=Mus musculus GN=Sil1 PE=1 SV=2	2	5
Phosphoglucomutase-1 OS=Mus musculus GN=Pgm1 PE=1 SV=4	2	5
Prostaglandin reductase 1 OS=Mus musculus GN=Ptgr1 PE=1 SV=2	2	5
ADP-ribosylation factor-interacting protein 1 OS=Mus musculus GN=Arfip1 PE=1 SV=1	2	5
BCL2 associated-X protein (Fragment) OS=Mus musculus GN=Bax PE=2 SV=1	2	5
NADH dehydrogenase [ubiquinone] flavoprotein 2, mitochondrial OS=Mus musculus GN=Ndufv2 PE=1 SV=2	2	5
Phosphatidylinositol-binding clathrin assembly protein OS=Mus musculus GN=Picalm PE=1 SV=1	2	5
Dehydrogenase/reductase SDR family member 7 OS=Mus musculus GN=Dhrs7 PE=1 SV=2	2	5
Glutathione S-transferase P 1 OS=Mus musculus GN=Gstp1 PE=1 SV=2	2	5
26S proteasome non-ATPase regulatory subunit 5 OS=Mus musculus GN=Psmd5 PE=1 SV=4	2	5
Epidermal growth factor receptor substrate 15 OS=Mus musculus GN=Eps15 PE=1 SV=1	2	5
Beta-hexosaminidase subunit beta OS=Mus musculus GN=Hexb PE=1 SV=2	2	6
5'-nucleotidase domain-containing protein 3 OS=Mus musculus GN=Nt5dc3 PE=1 SV=1	2	6
Synaptobrevin homolog YKT6 OS=Mus musculus GN=Ykt6 PE=1 SV=1	2	6
Annexin A8 OS=Mus musculus GN=Anxa8 PE=1 SV=2	2	6
Lupus La protein homolog OS=Mus musculus GN=Ssb PE=1 SV=1	2	6
Proteasome (Prosome, macropain) 26S subunit, non-ATPase, 13 OS=Mus musculus GN=Psmd13 PE=1 SV=1	2	9
39S ribosomal protein L27, mitochondrial OS=Mus musculus GN=Mrpl27 PE=1 SV=1		2
RAB35, member RAS oncogene family OS=Mus musculus GN=Rab35 PE=1 SV=1		2
MCG1050941 OS=Mus musculus GN=Gm5414 PE=1 SV=1		2
Protein YIF1B (Fragment) OS=Mus musculus GN=Yif1b PE=1 SV=1		2
39S ribosomal protein L17, mitochondrial OS=Mus musculus GN=Mrpl17 PE=1 SV=1		2
Formin-like protein 2 OS=Mus musculus GN=Fmnl2 PE=1 SV=1		2
Developmentally-regulated GTP-binding protein 2 OS=Mus musculus GN=Drg2 PE=1 SV=1		2
Nucleoside diphosphate kinase, mitochondrial OS=Mus musculus GN=Nme4 PE=1 SV=1		2
cDNA sequence BC017158 OS=Mus musculus GN=BC017158 PE=1 SV=1		2
Carbonic anhydrase 5B, mitochondrial OS=Mus musculus GN=Ca5b PE=1 SV=2		2
Far upstream element (FUSE)-binding protein 3 OS=Mus musculus GN=Fubp3 PE=1 SV=1		2
Very-long-chain (3R)-3-hydroxyacyl-CoA dehydratase 3 OS=Mus musculus GN=Hacd3 PE=1 SV=2		2
Plasminogen receptor (KT) OS=Mus musculus GN=Plgrkt PE=1 SV=1		2
V-type proton ATPase subunit a OS=Mus musculus GN=Tcirg1 PE=2 SV=1		2
Exportin-1 OS=Mus musculus GN=Xpo1 PE=1 SV=1		2
Proteasome (Prosome, macropain) 26S subunit, non-ATPase, 7 OS=Mus musculus GN=Psmd7 PE=1 SV=1		2
Serum albumin OS=Mus musculus GN=Alb PE=1 SV=3		2
Glyoxylate reductase/hydroxypyruvate reductase OS=Mus musculus GN=Grhpr PE=1 SV=1		2
Diacylglycerol O-acyltransferase 1 OS=Mus musculus GN=Dgat1 PE=1 SV=1		2
Uncharacterized protein OS=Mus musculus GN=St3gal1 PE=2 SV=1		2
Chromatin modifying protein 6 OS=Mus musculus GN=Chmp6 PE=1 SV=1		2
Uncharacterized protein OS=Mus musculus GN=Atp6ap1 PE=2 SV=1		2
Catechol O-methyltransferase domain-containing protein 1 OS=Mus musculus GN=Comtd1 PE=1 SV=1		2
PTB domain-containing engulfment adapter protein 1 OS=Mus musculus GN=Gulp1 PE=1 SV=1		2
Dynein light chain 1, cytoplasmic OS=Mus musculus GN=Dynll1 PE=1 SV=1		2
Serine/threonine-protein phosphatase 2A 56 kDa regulatory subunit OS=Mus musculus GN=Ppp2r5d PE=2 SV=1		2
Thy-1 membrane glycoprotein (Fragment) OS=Mus musculus GN=Thy1 PE=1 SV=1		2
Segment polarity protein dishevelled homolog DVL-2 OS=Mus musculus GN=Dvl2 PE=1 SV=2		2
IQ motif and SEC7 domain-containing protein 1 OS=Mus musculus GN=Iqsec1 PE=1 SV=1		2
Calmodulin-1 OS=Mus musculus GN=Calm1 PE=1 SV=1		2
MCG7614, isoform CRA_c OS=Mus musculus GN=Srsf5 PE=1 SV=1		2
Serine/threonine-protein phosphatase OS=Mus musculus GN=Ppp3ca PE=2 SV=1		2
Serine/threonine-protein kinase 3 OS=Mus musculus GN=Stk3 PE=1 SV=1		2
14-3-3 protein sigma OS=Mus musculus GN=Sfn PE=1 SV=2		2
Nuclear pore complex protein Nup93 OS=Mus musculus GN=Nup93 PE=1 SV=1		2
Serine/threonine-protein kinase PAK 2 OS=Mus musculus GN=Pak2 PE=1 SV=1		2
Membrane magnesium transporter 1 OS=Mus musculus GN=Mmgt1 PE=1 SV=1		2
Ubiquitin-like modifier-activating enzyme ATG7 OS=Mus musculus GN=Atg7 PE=1 SV=1		2
Transporter 2 ATP-binding cassette sub-family B OS=Mus musculus GN=Tap2 PE=2 SV=1		2
Leukotriene A-4 hydrolase OS=Mus musculus GN=Lta4h PE=1 SV=4		2
S-adenosylmethionine synthase OS=Mus musculus GN=Mat2a PE=1 SV=1		2
Glutamine--fructose-6-phosphate aminotransferase [isomerizing] 1 OS=Mus musculus GN=Gfpt1 PE=1 SV=3		2
Voltage-gated potassium channel subunit beta-2 OS=Mus musculus GN=Kcnab2 PE=1 SV=1		2
TraB domain-containing protein (Fragment) OS=Mus musculus GN=Trabd PE=1 SV=8		2
RIKEN cDNA 4432406C05 OS=Mus musculus GN=Tmem186 PE=1 SV=2		2
Importin-13 OS=Mus musculus GN=Ipo13 PE=1 SV=1		2
Myc box-dependent-interacting protein 1 OS=Mus musculus GN=Bin1 PE=1 SV=1		2
Vacuolar protein sorting 52 OS=Mus musculus GN=Vps52 PE=2 SV=1		2
Alcohol dehydrogenase class 4 OS=Mus musculus GN=Adh7 PE=2 SV=1		2
GPI ethanolamine phosphate transferase 1 OS=Mus musculus GN=Pign PE=1 SV=1		2
Glycerol-3-phosphate acyltransferase 3 OS=Mus musculus GN=Gpat3 PE=1 SV=1		2
Branched-chain-amino-acid aminotransferase, cytosolic OS=Mus musculus GN=Bcat1 PE=1 SV=2		2
Endoplasmic reticulum-Golgi intermediate compartment protein 3 OS=Mus musculus GN=Ergic3 PE=1 SV=1		2
RAB4A, member RAS oncogene family OS=Mus musculus GN=Rab4a PE=2 SV=1		2
MCG13921, isoform CRA_b OS=Mus musculus GN=March5 PE=1 SV=1		2
Latexin OS=Mus musculus GN=Lxn PE=1 SV=2		2
[truncated: 157 more rows]
